# Supplementary material
Source: Research Square preprint supplement (doi:10.21203/rs.3.rs-9256128/v1)
Supplement: Supplementary file 1 [file 5136680642f68ff1e5fb14af.doc]

Synergistic integration of LED illumination and sex pheromones: Advancing the trapping efficacy for *Anoplophora glabripennis*

Short title: Developing a multimodal trapping strategy for ALB

Zepeng Yang†, Huangling Wang†, Mengyao Wang, Juyun Yao, Xiaoxia Hai, Fei Lyu[[1]](#footnote-2)

College of Forestry, Hebei Agricultural University, Baoding, Hebei, China

**Key message**

1. Effective detection tools of ALB are urgently needed. 365 nm LEDs are the optimal wavelength for attracting adult ALB.

2. LED traps outperform pheromones in overall adult capture efficiency.

3. LEDs serve as visual anchors, extending attraction distance of chemical cues.

4. LED-pheromone synergy enhances male capture, though results vary by site.

5. Multimodal traps significantly improve surveillance efficacy for invasive ALB.

**Abstract：***Anoplophora glabripennis* is a highly destructive forest pest native to East Asia and poses a high-risk invasion threat to North America and Europe. While semiochemical-based lures are essential for monitoring *A. glabripennis*, their field efficacy remains insufficient. Given the potential of visual stimuli to enhance insect attraction, we systematically evaluated the integration of monochromatic light-emitting diodes (LEDs) wavelengths and their integration with semiochemicals-including both sex pheromones and host volatiles- to develop a high-efficiency multimodal trapping strategy. Initial screening of 14 monochromatic LED wavelengths revealed that 365-nm illumination was the most potent attractant for both male and female *A. glabripennis*. Notably, the addition of 365-nm illumination significantly enhanced the behavioral response to suboptimal chemical concentrations; specifically, it boosted female attraction to low concentrations of (-)-linalool and male-produced pheromones [4-(n-heptyloxy) butanol and 4-(n-heptyloxy) butanal], while increasing male sensitivity to female-emitted blends (heptanal, nonanal, and hexadecanal). Semi-field trials in greenhouse cages confirmed a synergistic effect, where the combination of 365-nm LEDs and female pheromones attracted significantly more males within a 100-cm radius than either stimulus alone. In contrast, no such synergy was observed for female attraction when male-produced pheromones were added to LED-baited traps. Finally, field experiments validated the enhanced efficacy of this multimodal approach for male capture, although this effect varied between study sites. Collectively, these results suggest that integrating visual (UVA-LED) and olfactory (semiochemical) cues can improve trapping efficiency compared to single-stimulus methods, providing a promising multimodal framework for the precision monitoring and capture of *A. glabripennis*.

**Keywords:** *Anoplophora glabripennis*; multimodal trapping strategies; 365 nm LED light; semiochemical

**1 Introduction**

The Asian longhorned beetle, *Anoplophora glabripennis*, an invasive species that causes severe damage to forest trees, has spread on many continents via wood packaging materials, wood products, round logs, and live plants (Haack et al., 2010). In the United States, an *A. glabripennis* outbreak could potentially damage 35% of urban trees, resulting in economic losses exceeding US$1 trillion  (Branco et al., 2022). In eastern Canada, potential *A. glabripennis*-related economic losses were estimated at approximately CDN$10 billion, including impacts on street trees, finished timber products, and maple food products (Pedlar et al., 2019). Diven by global climate change and the continuous expansion of transportation networks, the spread of *A. glabripennis* has accelerated, posing a significant challenge to global forestry management (Byeon et al., 2021; Ding et al., 2025). Therefore, effective surveillance strategies are crucial for the early detection and management of invasive pests to mitigate the ecological and economic impacts of this invasive species (Alonso Chávez et al., 2025).

Various semiochemicals have been reported as trapping lures for monitoring adult *A. glabripennis*, including male-produced volatile pheromones [4-(n-heptyloxy) butanol, 4-(n-heptyloxy) butanal] and female-produced long-range sex pheromones [heptanal, nonanal, hexadecanal]. Additionally, host kairomones including (*-*)-linalool and (*Z*)-3-hexen-1-ol have demonstrated significant potential in enhancing trap attraction (Wickham, 2009; Wickham et al., 2012; Zhang et al., 2002). Significantly, the integration of these pheromones with plant volatiles often creates a synergistic effect, maximizing trap efficacy (Meng et al., 2014). For instance, in Harbin, China, an average of 0.5 beetles per trap were captured using flight intercept panel traps with a combination of sex pheromones and plant volatiles over a period of 27 days (Meng et al., 2014). Despite the significant attraction of *A. glabripennis*to synthetic female-produced *α*-longipinene isomers, low field recovery rates suggest these pheromones alone are insufficient for robust monitoring (Xu et al., 2020).

Phytophagous insects rely on multiple cues to discriminate and recognize host plants and mates, including odor (olfactory cues), color, size and shape (visual cues), rather than solely semiochemical cues (Lyu et al., 2021; Lyu et al., 2015; Van Der Kooi et al., 2021). Consequently, the integration of visual and olfactory cues has been investigated and applied as an effective strategy in pest management (Nieri et al., 2022). This integration of multiple signaling modalities can effectively compensate for the limitations of single signal trapping methods, thereby enhancing capture efficiency (Nielsen, 2013; Van Tol et al., 2022). For example, the combination of green light with a semiochemical lure significantly enhances trap efficacy for the sweet potato weevil compared to the use of either green light or a semiochemical lure alone (Mcquate, 2014). The capture efficiency of *Xylotrechus longitarsis* and *Monochamus scutellatus* is significantly greater when semiochemicals are used in conjunction with black traps compared to white traps (Campbell & Borden, 2009).

For *A. glabripennis*, it have been demonstrated that adults exhibit a preference for host bark color over non-host bark color, suggesting that visual cues are also a potential influencing factor in the host location and recognition of adults (Lyu et al., 2021). Further research revealed that adult *A. glabripennis* is a positively phototactic insect, the phototactic behavioral responses of small populations are influenced by diel rhythm, sex, light exposure time, light wavelength and intensity (Jiang et al., 2023). Both female and male of *A. glabripennis* exhibit a pronounced positive phototaxis towards specific light-emitting diode (LED) wavelengths, particularly at the 365 nm and 420 nm spectra (Yao et al. 2024). While recent studies have demonstrated the fundamental attraction of small populations (e.g., 20 individuals) to these monochromatic cues (Jiang et al., 2023; Yao et al., 2024). Interestingly, Yao et al. (2024) recently confirmed the synergistic potential of UV-LED and high-concentration semiochemicals as a promising strategy for attracting *A. glabripennis* within laboratory settings, however, several critical knowledge gaps hinder the operational deployment of this multimodal technology. First, previous research primarily relied on collective behavioral assays (e.g., groups of 20 insects), which may introduce social interactions and mask the precise sensory limits of individuals. Second, the spatial synergistic dynamics across realistic scales have yet to be quantified. Current evidence relies heavily on restricted indoor assays (Yao et al. 2024), leaving a lack of quantitative data on the effective synergistic radius—specifically, how visual and olfactory cues interact as spatial distance increases(Van breugel et al., 2015). Finally, the transition from laboratory-scale evidence to field-level efficacy requires rigorous validation. Controlled environments fail to simulate the complex ambient light interference, shifting wind patterns, and heterogenous population dynamics of forest ecosystems (Hofmann et al., 2025).

To bridge these knowledge gaps, we established a multi-scale evaluation framework to systematically decipher the integration of visual and olfactory cues in *A.* *glabripennis* attraction. Specifically, we first (i) screened the spectral sensitivity of individual adults across 14 monochromatic LED wavelengths to identify the optimal "visual anchor" for orientation. Building on this optimal wavelength, we then (ii) utilized individual-based behavioral assays to eliminate inter-insect interference, specifically to decipher the compensatory mechanism by which the optimal 365-nm UV-LEDs lower olfactory response thresholds for an exhaustive library of known semiochemicals. Finally, to address the challenge of field scaling, we (iii) characterized the spatial recruitment dynamics at increased distances and validated the synergistic efficacy through both semi-field greenhouse assays and multi-site field trials. Ultimately, this study provides a theoretical foundation and practical guidance for developing high-sensitivity, multimodal monitoring systems for the management of *A. glabripennis*.

**2** **Materials and methods**

**2.1 Insects**

Wild *A. glabri**pennis* adults were collected from *Salix babylonica* L. in Baoding, Hebei Province, China, during the peak emergence periods (early June and mid-September) from 2023 to 2025. Collected adults were maintained in rearing cages (diameter = 24 cm; height = 22 cm) at a density of three pairs (females and males) in each cage. Cages were secured with 16–20 mesh nylon screening to prevent escape. Fresh *S. babylonica* cuttings (2–3 cm in diameter and 10–15 cm in length) were provided as a food source and replaced at 2-day intervals. Only physiologically vigorous individuals (10–20 days old) capable of mating and oviposition were selected for bioassays. All cages were maintained at 30 ± 1℃ and 60 ± 10 % relative humidity under a natural photoperiod (Sunrise: 05:00–05:30; Sunset: 19:30–20:00 GMT+8). Before behavioral testing, adults were starved for ~24 h before being used in the behavioral tests. Each adult was used only once to ensure the independence of observations.

**2.2 Light sources and behavioral test chamber**

To systematically characterize the spectral preference of *A. glabripennis*, fourteen monochromatic light-emitting diodes (LEDs) were employed as stimulation sources, spanning the ultraviolet to red spectra (365, 385, 400, 420, 435, 455, 475, 500, 515, 560, 595, 600, 630, and 660 nm). All lamps were manufactured by Shenzhen Xinhongxian Electronic Technology, Ltd (Shenzhen, China), with a power of 20 W per lamp, and the detailed parameters refer to (Jiang et al., 2023). A rheostat was connected to regulate the light intensity. To ensure that behavioral responses were driven by wavelength rather than photon flux, the light intensity at the center of the activity chamber was standardized across all treatments. Irradiance was measured using a high-speed spectrometer (HSU-100S, Asahi Spectra, Tokyo) equipped with a specialized sensor fiber. The photon flux was meticulously calibrated and maintained at a constant level of 6.31 × 1018 (photons/m²/s) (Miyatake et al., 2016).

To determine the relative attraction rate of the LED spectrum on the orientation behavior of female and male *A. glabripennis*, we designed a six-arm choice apparatus based on the insect's biological characteristics (Fig. S1), modified from Yao et al. (Yao et al., 2024). The apparatus (Yao et al., 2024)consists of a central arena and six connected test chambers (L = 50 cm × H = 20 cm × W = 20 cm). The central arena is a hexagonal prism (side length: 30 cm; height: 30 cm) featuring a 10-cm diameter aperture on the top panel for insect release. To minimize light reflection, opaque black acrylic boards were used indoors and outdoors, with the exception of a transparent top panel to facilitate observation. Bioassays were conducted in a dark, climate-controlled room at 25 ± 1 °C and 65 ± 10% RH.

**2.3** **The relative** **attractiveness of the LED spectrum on the orientation behavior**

To determine the relative attractiveness of the LED spectrum to the orientation behavior of adults, six-way choice experiments were performed in a completely dark indoor environment between 19:00–24:00. In each trial, six test chambers were connected to the lateral sides of the octahedron at an angle to the horizontal plane, thereby preventing light from being emitted into the opposite test chambers (Fig. S1 B). Five arms were randomly assigned different LED wavelengths, while the sixth served as a dark control. A single adult (female or male) was released into the center of the arena (Fig. S1a), and timing began immediately. The trial concluded when the insect entered a test arm or after a maximum duration of 10 min. A 'choice' was recorded if an insect entered the decision zone (region 'c', Fig. S1c) and remained for at least 10 s. Insects that failed to make a choice within 10 min were classified as non-responders and excluded from further analysis (Lyu et al., 2015). Between trials, the activity and test chambers were cleaned with alcohol and subsequently air-dried to eliminate any residual volatile cues from adults. Four wavelength combinations were tested in the following order: (a) 365 nm, 420 nm, 475 nm, 520 nm, 660 nm vs. dark control; (b) 365 nm, 420 nm, 385 nm, 455 nm, 630 nm vs. dark control; (c) 365 nm, 420 nm, 400 nm, 560 nm, 600 nm vs. dark control; and (d) 365 nm, 420 nm, 435 nm, 500 nm, 595 nm vs. dark control. Females and males were tested separately.

**2.****4 The attractiveness of** **semiochemicals under white and 365 nm LED lights** **on the orientation behavior**

2.4.1 Test chemicals and treatment groups

Synthetic semiochemicals were obtained from Sigma-Aldrich (Berlin, Germany) and diluted in paraffin oil to concentrations of 0.1, 1, 10, and 100 μg/μL (Xu et al., 2020; Yang et al., 2023). For bioassays, these compounds were categorized into two functional groups:

(i) Host Kairomones: This group included (*-*)-linalool, 3-carene, *D*-limonene, and heptanal (95% purity); *α*-pinene, (*Z*)-3-hexen-1-ol (98% purity); and *β*-caryophyllene (80% purity) (Xu & Teale, 2021).

(ii) Sex Pheromones: This group consisted of single components and multi-component blends. Single compounds included nonanal (95% purity), hexadecanal (97% purity). Two pheromone blends were prepared for testing:

Binary Blend: A 1:1 mixture of 4-(n-heptyloxy)butanal and 4-(n-heptyloxy)butanol (98% purity) (Zhang et al., 2002).

Ternary Blend: A 1:7:1 mixture of heptanal, nonanal, and hexadecanal (Wickham et al., 2012).

2.4.2 Y-tube olfactometer bioassays

Based on results from the initial spectral preference trials (Section 2.3), we selected the most attractive wavelength (365 nm) to evaluate whether UV illumination enhances the attractiveness of semiochemicals to adult *A. glabripennis*. Y-tube olfactometer bioassays were conducted under a white LED lamp (LED12WE27CD, 220–240 V, 50 Hz; Philips Holland, Shenzhen, Guangdong, China) and a 365 LED lamp. The light intensity for both sources was adjusted to 6.31 × 1018 (photons/m²/s). The Y-tube olfactometer was designed following (Yang et al., 2023)the design of Yang et al. (Yang et al., 2023), featuring an internal diameter of 8 cm, a base tube length of 40 cm, and arm lengths of 35 cm. Each arm was connected to a 2 000 mL spherical glass trap. Charcoal filtered air was pumped into two ball-shaped traps at a flow rate of 300 mL/min. All devices were connected by Teflon tubes.

For each trial, 10 μL of semiochemicals at concentrations of 0.1, 1, 10, and 100 μg/μL were dropped onto filter paper (30 mm × 30 mm) and introduced randomly into one of arms of the olfactometer, and the other arm was placed into filter paper with 10 μL of paraffin oil as a control (Yao et al., 2024). The olfactometer was cleaned with alcohol after each trial. The control and treatment groups were randomly assigned in each trial. Each female or male was individually placed in the central tube of the olfactometer and allowed to move upward toward the bifurcation of the “Y”-shaped arms. A 'choice' was recorded if the beetle entered the ball trap, whereas insects failing to enter either trap within 5 min were recorded as 'non-responders' and excluded from analysis. Females and males were tested separately with thirty to fifty biological replicates per group. These two choice bioassays were conducted in the following order: (i) host kairomones: (a) (-)-linalool vs. control, (b) (Z)-3-hexen-1-ol vs. control, (c) *D*-limonene vs. control, (d) 3-carene vs. control, (e) *α*-pinene vs. control, (f) *β*-caryophyllene vs. control under white and 365 nm LED lights; (ii) sex pheromones: (a) nonanal vs. control, (b) hexadecanal vs. control, (c) a blend of heptanal, nonanal, and hexadecanal [1:7:1] vs. control, (d) a blend of 4-(n-heptyloxy) butanal and 4-(n-heptyloxy)butanol [1:1] vs. control under white and 365 nm LED lights; (iii) Semiochemical comparison: (a) (-)-linalool vs. a blend of 4-(n-heptyloxy) butanal and 4-(n-heptyloxy)butanol [1:1] for female, and (b) nonanal vs. a blend of heptanal, nonanal, and hexadecanal [1:7:1] for male under 365 nm LED lights.

**2.****5 365 nm LED light and/or pheromones attract*****A. glabripennis* in semi-field experiments**

Based on the optimal attraction observed in the laboratory trials, we selected 365 nm LED light and specific pheromone blends to evaluate their combined trapping effects in a semi-field environment. Semi-field bioassays in an insect cage were conducted in the greenhouse between July and August 2024 and 2025 (Nehme et al. 2009). The volume of the insect cage is 32 m3 (L = 4 m × W = 4 m × H = 2 m), which is made of stainless-steel frame and nylon screening (Fig. 1 A). Lures were prepared using a filter paper sheet (30 mm × 30 mm) containing chemical compounds diluted in 20 μL of paraffin oil or of pheromone mixtures (10 μg/μL). Each lure was hung in the center of black flight-intercept panel traps (Pherobio Technology Co., Ltd., Beijing, China) (Xu et al., 2020)(Fig. 1 B). For light treatments, four 365 nm LED tape lights (10 W, 50 cm length × 2 cm width) were attached to the four surfaces of the trap. A trap was positioned on one side of the cage, and 20 adults (females or males, tested separately) were released from the opposite side (Fig. 1A, a). The number of beetles captured in the trap and the distance from the trap were recorded at 30 min intervals for a total duration of 180 minutes. Females and males were tested separately. Five biological replicates were measured for each treatment, a total of 100 different males and 100 different females were tested. Trapping experiments were conducted nightly from 19:00 to 24:00, evaluating five distinct treatments: (a) 365 nm LEDs with 20 μL paraffin oil (control); (b) 20 μL of a 1:1 blend of 4-(n-heptyloxy) butanal and 4-(n-heptyloxy) butanol; (c) 20 μL of a 1:7:1 blend of heptanal, nonanal, and hexadecanal; (d) 365 nm LEDs combined with treatment (b); and (e) 365 nm LEDs combined with treatment (c).

**2.6 365 nm LED light and/or pheromones attract*****A. glabripennis* in field experiments**

The attraction of 365 nm LED light and/or pheromones for adults was tested at a weeping willow (*Salix babylonica*) plantation with known *A. glabripennis* population in Dingzhou (114.92°-115.00° E, 38.62°-38.63° N) and Cangzhou (116.52°-116.62° E, 38.30°-38.35° N), Hebei Province, China, in August 2025. Lures were prepared by heat-sealing polyethylene tubing containing 1 mL sex pheromones diluted in 10 μg/μL of a blend of heptanal, nonanal, and hexadecanal [1:7:1] (Xu et al., 2020). Lures were hung in the center of black flight-intercept panel traps (Fig. 1 B). All lures were replaced every 12 h to maintain a consistent release rate. Traps were randomly suspended from host tree trunks at a height of 1–2 m above the ground, with a minimum horizontal distance of 100 m between adjacent traps to mitigate potential inter-trap interference (Nehme et al., 2010). Given that each study site consisted of a linear border forest (approximately 600 m × 5 m), we deployed three distinct trap types daily—365-nm LED, semiochemical-only, and the bimodal combination—to ensure independent sampling within the available space. The trapping experiments were conducted for six consecutive days at each site. During the trials, collection cups were kept dry to facilitate live capture. All *A. glabripennis* individuals were recorded and collected every 24 hours (between 8:00 PM and 8:00 AM the following day) and immediately transported to the laboratory to prevent re-capture or further field interference.(Nehme et al., 2010) The results from greenhouse cage experiment (2.6) revealed that the traps baited with the combination of 365 nm and the blend of heptanal, nonanal, and hexadecanal attracted the most males (Fig. 8). Therefore, 365 nm LED light and the sex pheromones heptanal, nonanal, and hexadecanal [1:7:1] were selected and mixed to test the attraction rates of the combinations for adults. Three types of traps were used in field experiment: (a) the trap including 365 nm LED lights with paraffin oil, (b) the trap involving 10 μg/μL of a blend of heptanal, nonanal, and hexadecanal [1:7:1], (c) the trap comprising 365 nm LED lights with 10 μg/μL of a blend of heptanal, nonanal, and hexadecanal [1:7:1]. Six biological replicates were measured per treatment.

**2.7 Statistical analysis**

For the six-way choice and Y-tube olfactometer bioassay, we used Chi-squared tests to assess the differences in the first-visit responses of adults to the different treatments. The first choice (%) in six-way choice and choice (%) in Y-tube olfactometer experiments was calculated using the following formulas:

In six-way choice tests:


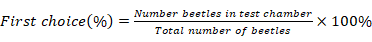
 (1)

In Y-tube olfactometer bioassay:


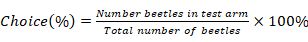
 (2)

In semi-field and field experiments, the differences in attraction rates and trapping catch numbers of females and males between treatments were measured using generalized linear models (GLMs) with a Poisson distribution and a log link function, followed by the Tukey-Kramer test. All the experimental data were statistically performed using SPSS Statistics v. 21.0 (IBM Corp., Armonk, NY, USA) for Windows.

**3 Results**

**3.1** **The relative attractive effectiveness of** **spectrum on the orientation behavior of adults**

When comparing the relative attraction of different spectra to female and male *A. glabripennis* in the six-way choice bioassays, the first choice of both sexes differed significantly among the LED treatments (Fig. 2; χ2 ≥11.8, P <0.05). Both sexes were more frequently observed orienting towards the sectors that contained LEDs in the range of 365–420 nm than to those with 435–660 nm LEDs or the dark control (Fig. 2 A–H). These findings indicate that the ultraviolet-to-violet spectra (365–420 nm) serve as the dominant visual cues driving the phototactic orientation of *A. glabripennis*.

**3.2 Attraction efficacy of** **semiochemicals under 365 nm and white LED light cues**

When six host kairomones were used to test the attraction effect on female and male adults, (-)-linalool and *D*-limonene significantly attracted females and *β*-caryophyllene attracted males at concentration of 0.1 μg/μL (Fig. 3). When 365 nm LED lights were added to the six host kairomones, the attraction effects of (-)-linalool at concentrations of 0.1 μg/μL and 1 μg/μL increased for females (Fig. 3 A). Neither females nor males showed a significant preference for the other chemical compoundsat different concentrations under 365 nm LED light (Fig. 3 B and C, Fig. S2). The results demonstrated addition of 365-nm UV-LEDs significantly enhanced the attraction efficacy of (-)-linalool at suboptimal concentrations for female *A. glabripennis*.

We also analyzed the attraction effectiveness of four sex pheromone treatments: nonanal, hexadecanal, a binary blend of 4-(n-heptyloxy)butanol and 4-(n-heptyloxy)butanal (1:1), and a ternary blend of heptanal, nonanal, and hexadecanal (1:7:1). For females, the hexadecanal and the binary blend elicited significant attraction at a concentration of 10 μg/μL (Fig. 4 B and C). The addition of 365 nm LED light significantly enhanced female attraction to the binary blend at concentrations of 0.1, 1, and 10μg/μL(Fig. 4C). Under white light, males were significantly attracted to nonanal at 0.1 μg/μL, 1μg/μL (Fig. 4 A), and to the female pheromone blend [heptanal: nonanal: hexadecanal = 1:7:1] at 100 μg/μL (Fig. 4 D). In contrast, under 365 nm LED light, males were significantly attracted to the nonanal at 1 μg/μL and the ternary blend at 10 μg/μL (Fig. 4 A and D). Our results confirm that 365-nm illumination effectively lowers the behavioral response thresholds of female, enabling a 100-fold reduction in the effective concentration.

Females were significantly more attracted to the male-produced pheromones than to linalool when both were presented at concentrations of 10 μg/μL (Fig. 5A). However, no significant differences were observed in the response of males to nonanal *vs.* the 1:7:1 blends of nonanal, heptanal, and hexadecanal at any of the concentrations tested (Fig. 5B).

**3.3 365 nm LED light and/or pheromones attract*****A. glabripennis* under semi-field conditions**

To validate the synergistic efficacy under natural conditions, we evaluated the capture performance of three trap configurations—365-nm UV-LEDs alone, two suboptimal pheromone blends (1:1 and 1:7:1) alone, and their respective multimodal combinations with UV-LEDs. During the female-targeted trapping assays, individuals were observed to initiate directed orientation, exhibiting clear behavioral trajectories from the release point toward the stimulus source (Fig. 6 A and B). At a spatial scale of 100 cm from the trapping point, the multimodal configurations—integrating 365-nm LEDs with either the blends heptanal: nonanal: hexadecanal [1:7:1] or 4-(n-heptyloxy) butanol: 4-(n-heptyloxy) butanal [1:1]—yielded significantly higher female attraction rates than single sex pheromone treatments throughout the 30–180 min observation period (Fig. 6B). After 180 min of exposure, the cumulative proportion of females attracted within the 100-cm radius reached 34%, 37%, and 40% for the UV-LED alone, the UV-LED + 1:7:1 blend, and the UV-LED + 1:1 blend, respectively (Fig. 6B). These findings demonstrate that the addition of a visual anchor not only initiates orientation but also sustains attract efficacy at increased spatial distances where chemical signals alone are insufficient.

Consistent with the observations in females, males displayed directed orientation toward the trapping point within a 100-cm radius (Fig. 7A). Among all five treatments, multimodal combination (365 LED lights + blends [heptanal: nonanal: hexadecanal = 1:7:1]) attracted a significantly higher number of males than any other group throughout the 30–180 min interval (Fig. 7 B). Within the 100-cm radius, this recruitment efficacy peaked at 150 min, with the same multimodal trap successfully attracting 73% of released males, demonstrating a robust synergistic attraction for the male population (Fig. 7 B).

Furthermore, we also analyzed the capture efficiency of the five treatments for both sexes over a 180-min period (Fig. 8). For females, 365-nm UV-LEDs alone consistently outperformed all other treatments from 30 to 180 min (Fig. 8A–F). By the end of the 180-min interval, the 365-nm LED traps secured an average of 3.80 ± 0.37 captures, significantly exceeding the catch of both single pheromone cues and their multimodal combinations (Fig. 8F). In contrast, males exhibited a pronounced synergistic response to multimodal stimuli. The integration of 365-nm LEDs with female-produced pheromones (365 nm + FPP) yielded significantly higher capture rates than any other treatment throughout the observation period (Fig. 8A–F). At 180 min, this synergistic combination achieved a peak capture of 4.40 ± 1.17 individuals, accounting for 22% of the total released male population (Fig. 8F). These results indicate that while visual cues serve as a primary attractant for females, the integration of 365-nm LEDs and pheromones provides a robust compensatory mechanism for males, effectively overcoming the attenuation of chemical signals to maintain high attraction efficiency at realistic spatial scales.

**3.4 365 nm LED light and/or pheromones attract*****A. glabripennis* in field experiments**

In Dingzhou, traps equipped with the bimodal combination (365-nm LED + 1:7:1 pheromone blend) captured more adults than those using light or chemical cues alone; however, this increase was statistically significant only for females (Fig. 9 A, females: *X*2=8.000 p=0.018, males: *X*2=1.875, p=0.395). In Cangzhou, the bimodal traps with a combination 365 nm LED lights and sex pheromone blends [heptanal:nonanal:hexadecanal = 1:7:1] captured significantly more individuals of both sexes compared to all other treatments (Fig. 9 B, females: *X*2=9.000, p=0.011, males: *X*2=7.000, p = 0.030). When males and females were analyzed together, the combination 365 nm LED lights with sex pheromones consistently outperformed the single-stimulus treatments, particularly the pheromones alone (Fig. 9, Dingzhou: *X*2=8.032, p=0.018, Cangzhou: *X*2=16.000, p<0.001). Overall, a total of 17 females and 14 males were captured throughout the field assays. These field-level results confirm the practical efficacy of integrating 365-nm LEDs with semiochemicals for the detection of *A. glabripennis* in natural forest ecosystems.

**4 Discussion**

Semiochemical-based trapping has been widely utilized for detecting, monitoring, and potentially controlling longhorned beetles (Allison & Redak, 2017; Leal, 2013; Nahrung et al., 2023). However, to date, trapping with semiochemical lures has not achieved operational efficacy in the monitoring and surveillance of cerambycids, particularly *A. glabripennis* (Lyu et al., 2023; L. Wang et al., 2023; Xu & Teale, 2021). Current monitoring strategies for Cerambycidae are severely hindered by a pervasive 'low-catch' bottleneck. Our systematic review of trapping data for 43 species within the Cerambycinae and Lamiinae subfamilies reveals that approximately 80% (34 species) yield fewer than 10 individuals per 10-14 days trapping period (Fig. S3) (Hanks & Millar, 2013; Nehme et al., 2010; Ray et al., 2012; Silva et al., 2016; Wickham et al., 2012; J. D. Wickham et al., 2014; J. D. Wickham et al., 2016; Xu et al., 2020; N. Zhu et al., 2017). This pervasive inefficiency is well-documented in previous efforts to optimize chemical lures for *A. glabripennis*. For instance, Xu et al. 2020 (Xu et al., 2020) demonstrated that traps baited with α-longipinene and host compounds or sex pheromones, total captures reached only 14 males and 10 females over an entire peak season (July 29 to September 2, 2017(Xu et al., 2020)(Wickham et al., 2012)). These collective findings underscore the inherent limitations of relying solely on single-modality chemical cues, regardless of how precisely the blend mimics biological profiles. To transcend these limits, our study moves beyond chemical optimization to a comprehensive spectral and semiochemical integration. By utilizing 365-nm UV-LEDs as a 'visual anchor,' we successfully lowered behavioral response thresholds by 10- to 100-fold, providing a high-sensitivity framework for early-stage detection where standard lures consistently fail. This sensory potentiation was further validated in both semi-field and field experiments, where bimodal traps (365-nm LED + sex pheromones) captured significantly more males, as well as a greater number of both sexes than those with the other treatments, especially single semiochemical cues (Figs. 8 and 9). These findings confirm that integrating visual and olfactory stimuli effectively converts suboptimal chemical signals into robust attractants, overcoming the pervasive 'low-catch' bottleneck in forest monitoring.

Field trials demonstrated that traps integrating 365-nm LEDs with female-produced pheromones outperformed single-stimulus lures, yielding a total of 10 females and 10 males through a rigorous regime of 12 trapping events per day, whereas only 1 male was trapped by female-produced pheromones. These results suggested the addition of 365-nm LEDs significantly enhanced the attraction capacity of semiochemical cues, yet the absolute capture rates under natural forest conditions remained relatively low. This is likely attributable to several ecological and environmental factors: (1) Due to the scheduling of pre-experiments, the field experiments were unfortunately postponed until late August. In Northern China, adults typically exhibit a phenological window spanning from early June to late August (Haack et al., 2010). Consequently, conducting experiments at the end of this period coincides with a natural population senescence; the declining adult density in late August (Haack et al., 2010)significantly reduces the probability of encounter and recruitment, inevitably leading to the observed lower capture rates. (2) In semi-field and field experiments, we observed that a portion of beetles were successfully attracted to the trapping boards but failed to enter the collection cups, eventually flying away. To address this, replacing the trapping boards with sticky surfaces in future designs could significantly improve trapping efficiency by preventing beetles from leaving, thereby increasing maximizing the practical utility of the 365-nm LED and pheromone synergy. (3) The suboptimal attraction observed in field conditions may stem from the incomplete composition, inappropriate proportions, or inadequate concentrations of the current lures. Therefore, further research should systematically determine the optimal ratio of 365-nm LED and pheromone blends to maximize attraction efficiency.

The efficacy of multimodal lures is heavily dictated by the interplay of composition, ratio, and concentration. Our findings reveal a distinct dose-dependent attraction profile, where a 100 μg/μL pheromone blend (heptanal, nonanal, and hexadecanal) significantly recruited males, whereas lower concentrations failed to elicit a behavioral response (Fig. 4D). This requirement for higher chemical titers aligns with the established sensory thresholds observed in previous studies, where host volatiles such as R-α-pinene, S-α-pinene, S-β-pinene, and phellandrene necessitated high concentrations (0.04–2 mol/L) to trigger effective orientation (Fan et al., 2013). However, we observed a notable divergence in sensitivity between single and mixed cues, in which the individual pheromone nonanal-unlike the multi-component mixture-exhibited potent attractiveness at lower concentrations, with its efficacy paradoxically diminishing at higher doses (Fig. 4A). Furthermore, we observed a distinct sex-specific response divergence characterized by the fact that integrating 365-nm LEDs with female-produced pheromones yielded peak male attraction. Conversely, the addition of male-produced pheromones unexpectedly reduced female attraction compared to the 365-nm LED cue alone, suggesting a potential sensory interference in females when specific bimodal signals are combined. These findings underscore the necessity of further research into the gender-specific responses to the composition, proportion, and concentration of lures derived from both host plants and conspecific mates (Xu and Teale 2021).

(Fan et al., 2013)(Xu & Teale, 2021)(Lyu et al., 2023; L. Wang et al., 2023; Wickham, 2009; Wickham et al., 2012; Xu & Teale, 2021; Zhang et al., 2002)(Li et al., 2017)(Nehme et al., 2009)(Fan et al., 2012)So far, approximately 13 attractive host kairomones and 20 pheromones have been identified as chemical cues for adult *A. glabripennis*, including (-)-linalool, *cis*-3-hexen-1-ol, and 4-(n-heptyloxy) butanol, 4-(n-heptyloxy) butanal, and heptanal, nonanal, hexadecanal (Lyu et al., 2023; L. Wang et al., 2023; Wickham, 2009; Wickham et al., 2012; Xu & Teale, 2021; Zhang et al., 2002). While screen sleeve traps baited with (-)-linalool previously demonstrated field efficacy (Nehme et al., 2009), our results clarify the gender-specific and concentration-dependent nature of this attraction. Specifically, (-)-linalool alone exhibited significant recruitment of females at 0.1 μg/μL. Crucially, the integration of 365-nm LEDs functioned as a sensory catalyst, significantly amplifying the attraction of (-)-linalool for females across both suboptimal and moderate concentrations (0.1 and 1 μg/μL). Furthermore, our study addresses long-standing discrepancies between electrophysiological and behavioral data. Although (Z)-3-hexen-1-ol elicits robust EAG responses in both sexes, these physiological signals often fail to translate into effective orientation behavior (Fan et al., 2012). Indeed, our behavioral assays revealed that neither sex exhibited a significant preference for (Z)-3-hexen-1-ol, regardless of concentration or the presence of 365-nm LED light. This suggests that while certain volatiles trigger antennal excitation, they may not act as primary orientation cues unless integrated into a more complex multimodal matrix (Kishore et al., 2024).

Despite the traditional focus on chemical lures (Y. Wang et al., 2022), herbivorous insects (Y. Wang et al., 2022)rely on a complex integration of olfactory, visual, and tactile stimuli to locate hosts (Nieri et al., 2022; Vinauger et al., 2019; Z. Zhu et al., 2024). Previous studies confirm that host recognition in this species is not driven by isolated signals, but by the synergistic interaction of visual and olfactory cues (Lyu et al., 2021; Lyu et al., 2015). Our research builds on this multimodal framework, utilizing 365-nm -LEDs to address the inherent limitations of single-modality chemical monitoring in diverse forest ecosystems. In Y-tube olfactometer tests, the integration of 365-nm LEDs with either (-)-linalool or sex pheromones, the attraction effect of these semiochemicals was significantly enhanced for both females and males compared with single chemicals. This synergistic effect was further validated under semi-field and field conditions, where the pheromone mixture [heptanal: nonanal: hexadecanal = 1:7:1] combined with 365 nm LEDs yielded significantly higher male attraction rate than single semiochemicals. These findings showed that the synergistic effects of semiochemical and light cues could improve the detection efficiency of adult *A. glabripennis*.

Adults *A. glabripennis* attack healthy trees across an expansive range of 209 deciduous species, a polyphagy that has driven the evolution of sophisticated host recognition mechanisms based on complex chemical cues (Lyu et al., 2023). Given this complexity, relying on single chemical compounds for monitoring is often insufficient. Previous studies have suggested that visual cues are often more effective than olfactory signals for long-range attraction in this species (Song et al., 2015). To address these limitations, we developed a synergistic strategy integrating close-range semiochemicals with long-range 365 nm LED attraction, overcoming the constraints of single-signal approaches. In this multimodal approach, LEDs attract adults from a long-distance, while contact and short-range pheromones facilitate final capture (Fig. 10). Our results confirm that this integration significantly outperforms single-cue treatments under both semi-field and field conditions, providing a more robust tool for *A. glabripennis* monitoring.

In conclusion, we developed a novel strategy that integrates 365 nm LED lights with semiochemicals to provide both long-range and close-range cues simultaneously, effectively overcoming the inherent limitations of semiochemicals-only trapping. In this dual-signal framework, LED lights serve as macro-scale attractants to attract adults toward the trapping area, while close-range and contact pheromones facilitate micro-scale localization, significantly boosting trapping efficiency (Fig. 10). Our results demonstrate the integration of LED lights with sex pheromones outperforms conventional single-cue approaches under both semi-field and field conditions, representing a substantial advancement over currently available chemical attractants.

**Author contributions**

FL and HW conceived and designed the experiments; ZY, MW, JY and XH collected the experimental data; ZY, JY and XH analyzed the data; and FL, HW, ZY and XH wrote the manuscript. All the authors read and approved the manuscript.

**Acknowledgments**

We would like to thank the personnel at Hebei Agricultural University (Zhao Feng, Hao Kaixing, and He Yanjun) for their assistance with insect collection in the field. We also thank the Natural Science Foundation of Hebei Province of China (No. C 2025204107) and the National Natural Science Foundation of China (No. 32171800) for their generous support.

**Compliance with Ethical Standards**

Funding: This research was funded by the Natural Science Foundation of Hebei Province of China (No. C2025204107) and the National Natural Science Foundation of China (No. 32171800) .

Conflict of interest: The authors declare that they have no conflicts of interest.

Ethical approval: This article does not contain any studies with human participants or animals performed by any of the authors.

**References**

Allison JD, Redak RA (2017) The impact of trap type and design features on survey and detection of bark and woodboring beetles and their associates: a review and meta-analysis. Annu Rev Entomol. 62: 127-146. <https://doi.org/10.1146/annurev-ento-010715-023516>

Alonso Chávez V, Brown N, van den Bosch F, Parnell S, Dyke A, Hall C, Karlsdottir B, Marzano M, Morris J, O'Brien L, Williams D, Milne AE (2025) Early detection strategies for invading tree pests: Targeted surveillance and stakeholder perspectives. J Appl Ecol. 62: 857-871. https://doi.org/10.1111/1365-2664.70009

Branco S, Faccoli M, Brockerhoff EG, Roux G, Jactel H, Desneux N, Gachet E, Mouttet R, Streito JC, Branco M (2022) Preventing invasions of Asian longhorn beetle and citrus longhorn beetle: are we on the right track? J Pest Sci. 95: 41-66. https://doi.org/10.1007/s10340-021-01431-x

Byeon Dh, Kim SH, Jung JM, Jung S, Kim KH, Lee WH (2021) Climate‐based ensemble modelling to evaluate the global distribution of *Anoplophora glabripennis* (Motschulsky). Agr Forest Entomol. 23: 569-583. https://doi.org/10.1111/afe.12462

Campbell SA, Borden JH (2009) Additive and synergistic integration of multimodal cues of both hosts and non‐hosts during host selection by woodboring insects. Oikos. 118: 553-563. https://doi.org/10.1111/j.1600-0706.2009.16761.x

Ding W, Li H, Wen C, Wen J (2025) The ecological niche of two invasive species, Asian Longhorned Beetle and its host Russian Olive, has been affected by invasion and climate change. Entomol Gen. 45: 105-116. https://doi.org/10.1127/entomologia/2024/2907

Fan L, Yan S, Cheng H, Sun Z (2012) Antennal activity and EAG responses of Asian longhorn beetle *Anoplophora glabripennis* (Coleoptera: Cerambycidae) to plant terpenes. J Northeast Forestry University. 40: 143-146. https://doi.org/10.13759/j.cnki.dlxb.2012.11.018

Fan L, Yan S, Sun Z, Meng Z (2013) EAG and behavioral responses of Asian longhorn beetle Anoplophora glabripennis (Coleoptera: Cerambycidae) to plant volatiles. Chinese J Ecol. 32: 142-148. https://doi.org/10.13292/j.1000-4890.2013.0055

Haack RA, Herard F, Sun J, Turgeon JJ (2010) Managing invasive populations of Asian longhorned beetle and citrus longhorned beetle: a worldwide perspective. Annu Rev Entomol. 55: 521-546. https://doi.org/10.1146/annurev-ento-112408-085427

Hanks LM, Millar JG (2013) Field bioassays of cerambycid pheromones reveal widespread parsimony of pheromone structures, enhancement by host plant volatiles, and antagonism by components from heterospecifics. Chemoecology. 23: 21-44. <https://doi.org/10.1007/s00049-012-0116-8>

Hofmann S, Kautz M, Sonnemann S, Otto L (2025) Significant uncertainty in bark beetle trap catches due to varying pheromone release from dispensers and local trap position. J Pest Sci 98, 2065-2076. https://doi.org/10.1007/s10340-025-01924-z.

Jiang X, Hai X, Bi Y, Zhao F, Wang Z, Lyu F (2023) Research on photoinduction-based technology for trapping Asian longhorned beetle *Anoplophora glabripennis* (Motschulsky, 1853) (Coleoptera: Cerambycidae). Insects. 14: 465. <https://doi.org/10.3390/insects14050465>.

Kishore SM, Hanumantharaya L, Sujith KM (2024). Unveiling insect olfaction: advances and applications of electroantennography and single sensillum recording. Insect Environ 4: 452-457. https://doi.org/10.3390/10.55278/MQWN1676.

Leal WS (2013) Odorant reception in insects: roles of receptors, binding proteins, and degrading enzymes. Annu Rev Entomol. 58: 373-391. https://doi.org/10.1146/annurev-ento-120811-153635

Lyu F, Hai X, Wang Z (2021) Green-colored paperboard enhances the Asian longhorned beetle response to host plant odor cues. J Pest Sci. 94: 1345-1355. https://doi.org/10.1007/s10340-020-01318-3

Lyu F, Hai X, Wang Z (2023) A review of the host plant location and recognition mechanisms of Asian longhorn beetle. Insects 14 (3):292. https://doi.org/10.3390/ insects14030292

Lyu F, Hai X, Wang Z, Yan A, Liu B, Bi Y (2015) Integration of visual and olfactory cues in host plant identification by the Asian Longhorned Beetle, *Anoplophora glabripennis* (Motschulsky) (Coleoptera: Cerambycidae). PLoS One 10: e0142752. https://doi.org/10.1371/journal.pone.0142752

McQuate GT (2014) Green light synergistally enhances male sweetpotato weevil response to sex pheromone. Sci Rep. 4: 4499. https://doi.org/10.1038/srep04499

Meng PS, Trotter RT, Keena MA, Baker TC, Yan S, Schwartzberg EG, Hoover K (2014) Effects of pheromone and plant volatile release rates and ratios on trapping *Anoplophora glabripennis* (Coleoptera: Cerambycidae) in China. Environ Entomol. 43 (5):1379-1388. https://doi.org/10.1603/EN14129

Miyatake T, Yokoi T, Fuchikawa T, Korehisa N, Kamura T, Nanba K, Ryouji S, Kamioka N, Hironaka M, Osada M, Hariyama T, Sasaki R, Shinoda K (2016) Monitoring and detecting the cigarette beetle (Coleoptera: Anobiidae) using ultraviolet (LED) direct and reflected lights and/or pheromone traps in a laboratory and a storehouse. J Econ Entomol. 109: 2551-2560. https://doi.org/10.1093/jee/tow225

Nahrung HF, Liebhold AM, Brockerhoff EG, Rassati D (2023) Forest insect biosecurity: processes, patterns, predictions, pitfalls. Annu Rev Entomol. 68: 211-229. https://doi.org/10.1146/annurev-ento-120220-010854

Nehme ME, Keena MA, Zhang A, Baker TC, Hoover K (2009) Attraction of *Anoplophora glabripennis* to male-produced pheromone and plant volatiles. Environ Entomol. 38 (6):1745-1755. https://doi.org/10.1603/022.038.0628

Nehme ME, Keena MA, Zhang A, Baker TC, Xu Z, Hoover K (2010) Evaluating the use of male-produced pheromone components and plant volatiles in two trap designs to monitor *Anoplophora glabripennis*. Environ Entomol 39: 169-176. https://doi.org/10.1603/EN09177

Nielsen M (2013) Factors affecting the response of thrips to an olfactory cue. Ph.D. dissertation, Lincoln University, Lincoln.

Nieri R, Anfora G, Mazzoni V, Stacconi M (2022) Semiochemicals, semiophysicals and their integration for the development of innovative multi-modal systems for agricultural pests' monitoring and control. Entomol Gen. 42: 167-183. https://doi.org/10.1127/entomologia/2021/1236

Pedlar JH, Mckenney DW, Denys Y, Hope ES (2019) Potential economic impacts of the Asian longhorned beetle (Coleoptera: Cerambycidae) in eastern Canada. J Econ Entomol. 113: 839-850. https://doi.org/10.1093/jee/toz317

Ray AM, Barbour JD, McElfresh JS, Moreira JA, Swift I, Wright IM, Žunič A, Mitchell RF, Graham EE, Alten RL, Millar JG, Hanks LM (2012) 2,3-Hexanediols as sex attractants and a female-produced sex pheromone for cerambycid beetles in the prionine genus *Tragosoma*. J Chem Ecol. 38: 1151-1158. https://doi.org/10.1007/s10886-012-0181-z

Silva WD, Millar JG, Hanks LM, Bento JM (2016) (6E,8Z)-6,8-pentadecadienal, a novel attractant pheromone produced by males of the Cerambycid beetles *Chlorida festiva* and *Chlorida costata*. J Chem Ecol. 42: 1082-1085. https://doi.org/10.1007/s10886-016-0742-7

Song B, Niu Y, Jürg S, Chen G, Peng D, Gao Y, Sun H (2015) Pollinator attraction in *Cornus capitata* (Cornaceae): The relative role of visual and olfactory cues. J Plant Ecol. 8: 173-181. https://doi.org/10.1093/jpe/rtv012

Van der Kooi CJ, Stavenga DG, Arikawa K, Belusic G, Kelber A (2021) Evolution of insect color vision: from spectral sensitivity to visual ecology. Annu Rev Entomol. 66: 435-461. https://doi.org/10.1146/annurev-ento-061720-071644

van Tol RW, Diaz Rodriguez CM, de Bruin A, Yang D, Taparia T, Griepink FC (2022) Visual attraction of the European tarnished plant bug *Lygus rugulipennis* (Hemiptera: Miridae) to a water trap with LED light in chrysanthemum greenhouses and olfactory attraction to novel compounds in Y‐tube tests. Pest Manag Sci. 78: 2523-2533. <https://doi.org/10.1002/ps.6881>

Van Breugel F, Riffell J, Fairhall A, Dickinson MH (2015). Mosquitoes use vision to associate odor plumes with thermal targets. Curr Biol 25: 2123-2129. https://doi.org/10.1016/j.cub.2015.06.046

Vinauger C, Van Breugel F, Locke LT, Tobin KKS, Dickinson MH, Fairhall AL, Akbari OS, Riffell JA (2019) Visual-olfactory integration in the Human disease vector mosquito *Aedes aegypti*. Curr Biol. 29: 2509-2516. https://doi.org/10.1016/j.cub.2019.06.043

Wang L, Li C, Luo Y, Wang G, Dou Z, Haq IU, Shang S, Cui M (2023) Current and future control of the wood-boring pest *Anoplophora glabripennis*. Insect Sci. 30: 1534-1551. https://doi.org/10.1111/1744-7917.13187

Wang Y, Fang G, Xu P, Gao B, Liu X, Qi X, Zhang G, Cao S, Li Z, Ren X, Wang H, Cao Y, Pereira R, Huang Y, Niu C, Zhan S (2022) Behavioral and genomic divergence between a generalist and a specialist fly. Cell Rep. 41: 111654. https://doi.org/10.1016/j.celrep.2022.111654

Wickham (2009) Semiochemicals of the Asian longhorned beetle, *Anoplophora glabripennis* (Motschulsky), (Coleoptera: Cerambycidae). Ph.D. dissertation, State University of New York, USA.

Wickham, Xu Z, Teale SA (2012) Evidence for a female-produced, long range pheromone of *Anoplophora glabripennis* (Coleoptera: Cerambycidae). Insect Sci. 19: 355-371. https://doi.org/10.1111/j.1744-7917.2012.01504.x

Wickham JD, Harrison RD, Lu W, Guo Z, Millar JG, Hanks LM, Chen Y (2014) Generic lures attract cerambycid beetles in a tropical montane rain forest in southern China. J Econ Entomol. 107: 259-267. https://doi.org/10.1603/ec13333

Wickham JD, Millar JG, Hanks LM, Zou Y, Wong JC, Harrison RD, Chen Y (2016) (2R,3S)-2,3-Octanediol, a female-produced sex pheromone of Megopis costipennis (Coleoptera: Cerambycidae: Prioninae). Environ Entomol. 45: 223-228. https://doi.org/10.1093/ee/nvv176

Xu T, Hansen L, Cha DH, Hao D, Zhang L, Teale SA (2020) Identification of a female-produced pheromone in a destructive invasive species: Asian longhorn beetle, *Anoplophora glabripennis*. J Pest Sci. 93: 1321-1332. https://doi.org/10.1007/s10340-020-01229-3

Xu T, Teale SA (2021) Chemical ecology of the Asian longhorn beetle, *Anoplophora glabripennis*. J Chem Ecol. 47: 489-503. https://doi.org/10.1007/s10886-021-01280-z

Yang B, Cao D, Su Z, Wei J (2023) The attractive host volatiles can enhance oviposition of *Anoplophora glabripennis* on a non-host tree. Pest Manag Sci. 79: 3538-3547. https://doi.org/10.1002/ps.7535

Yao J, Jiang X, Wang X, Hai X, Wang Z, Lyu F (2024) Ultraviolet and violet light enhance the attraction efficacy of semiochemicals for the Asian longhorned beetle. Entomol Gen. 44: 1161-1172. https://doi.org/10.1127/entomologia/2024/2737

Zhang A, Oliver JE, Aldrich JR, Wang B, Mastro VC (2002) Stimulatory beetle volatiles for the Asian longhorned beetle, *Anoplophora glabripennis* (Motschulsky). Zeitschrift fur Naturforschung C 57: 553-558. https://doi.org/10.1515/znc-2002-5-626

Zhu N, Zhang D, Wu L, Hu Q, Fan J (2017) Attractiveness of aggregation pheromone and host plant volatiles to *Anoplophora glabripennis* and *A. chinensis* (Coleoptera: Cerambycidae). Acta Entomologica Sinica. 60: 421-430. <https://doi.org/10.16380/j. kcxb. 2017.04.007>Zhu Z, Di N, Kou J, Zhang Y, Harwood JD, Wang S, Desneux N, Xu Z (2024) Different LED light qualities alter tomato plant growth and performance of two herbivores. Entomol Gen. 44: 1173-1181. https://doi.org/10.1127/entomologia/2024/2728**Figures**

Fig. 1 Diagram of the insect cage (A) and black flight-intercept panel trap (B) used in the semi-field and field bioassays. The release point of the test insect (a). The suspended location of the black flight-intercept panel trap (b).


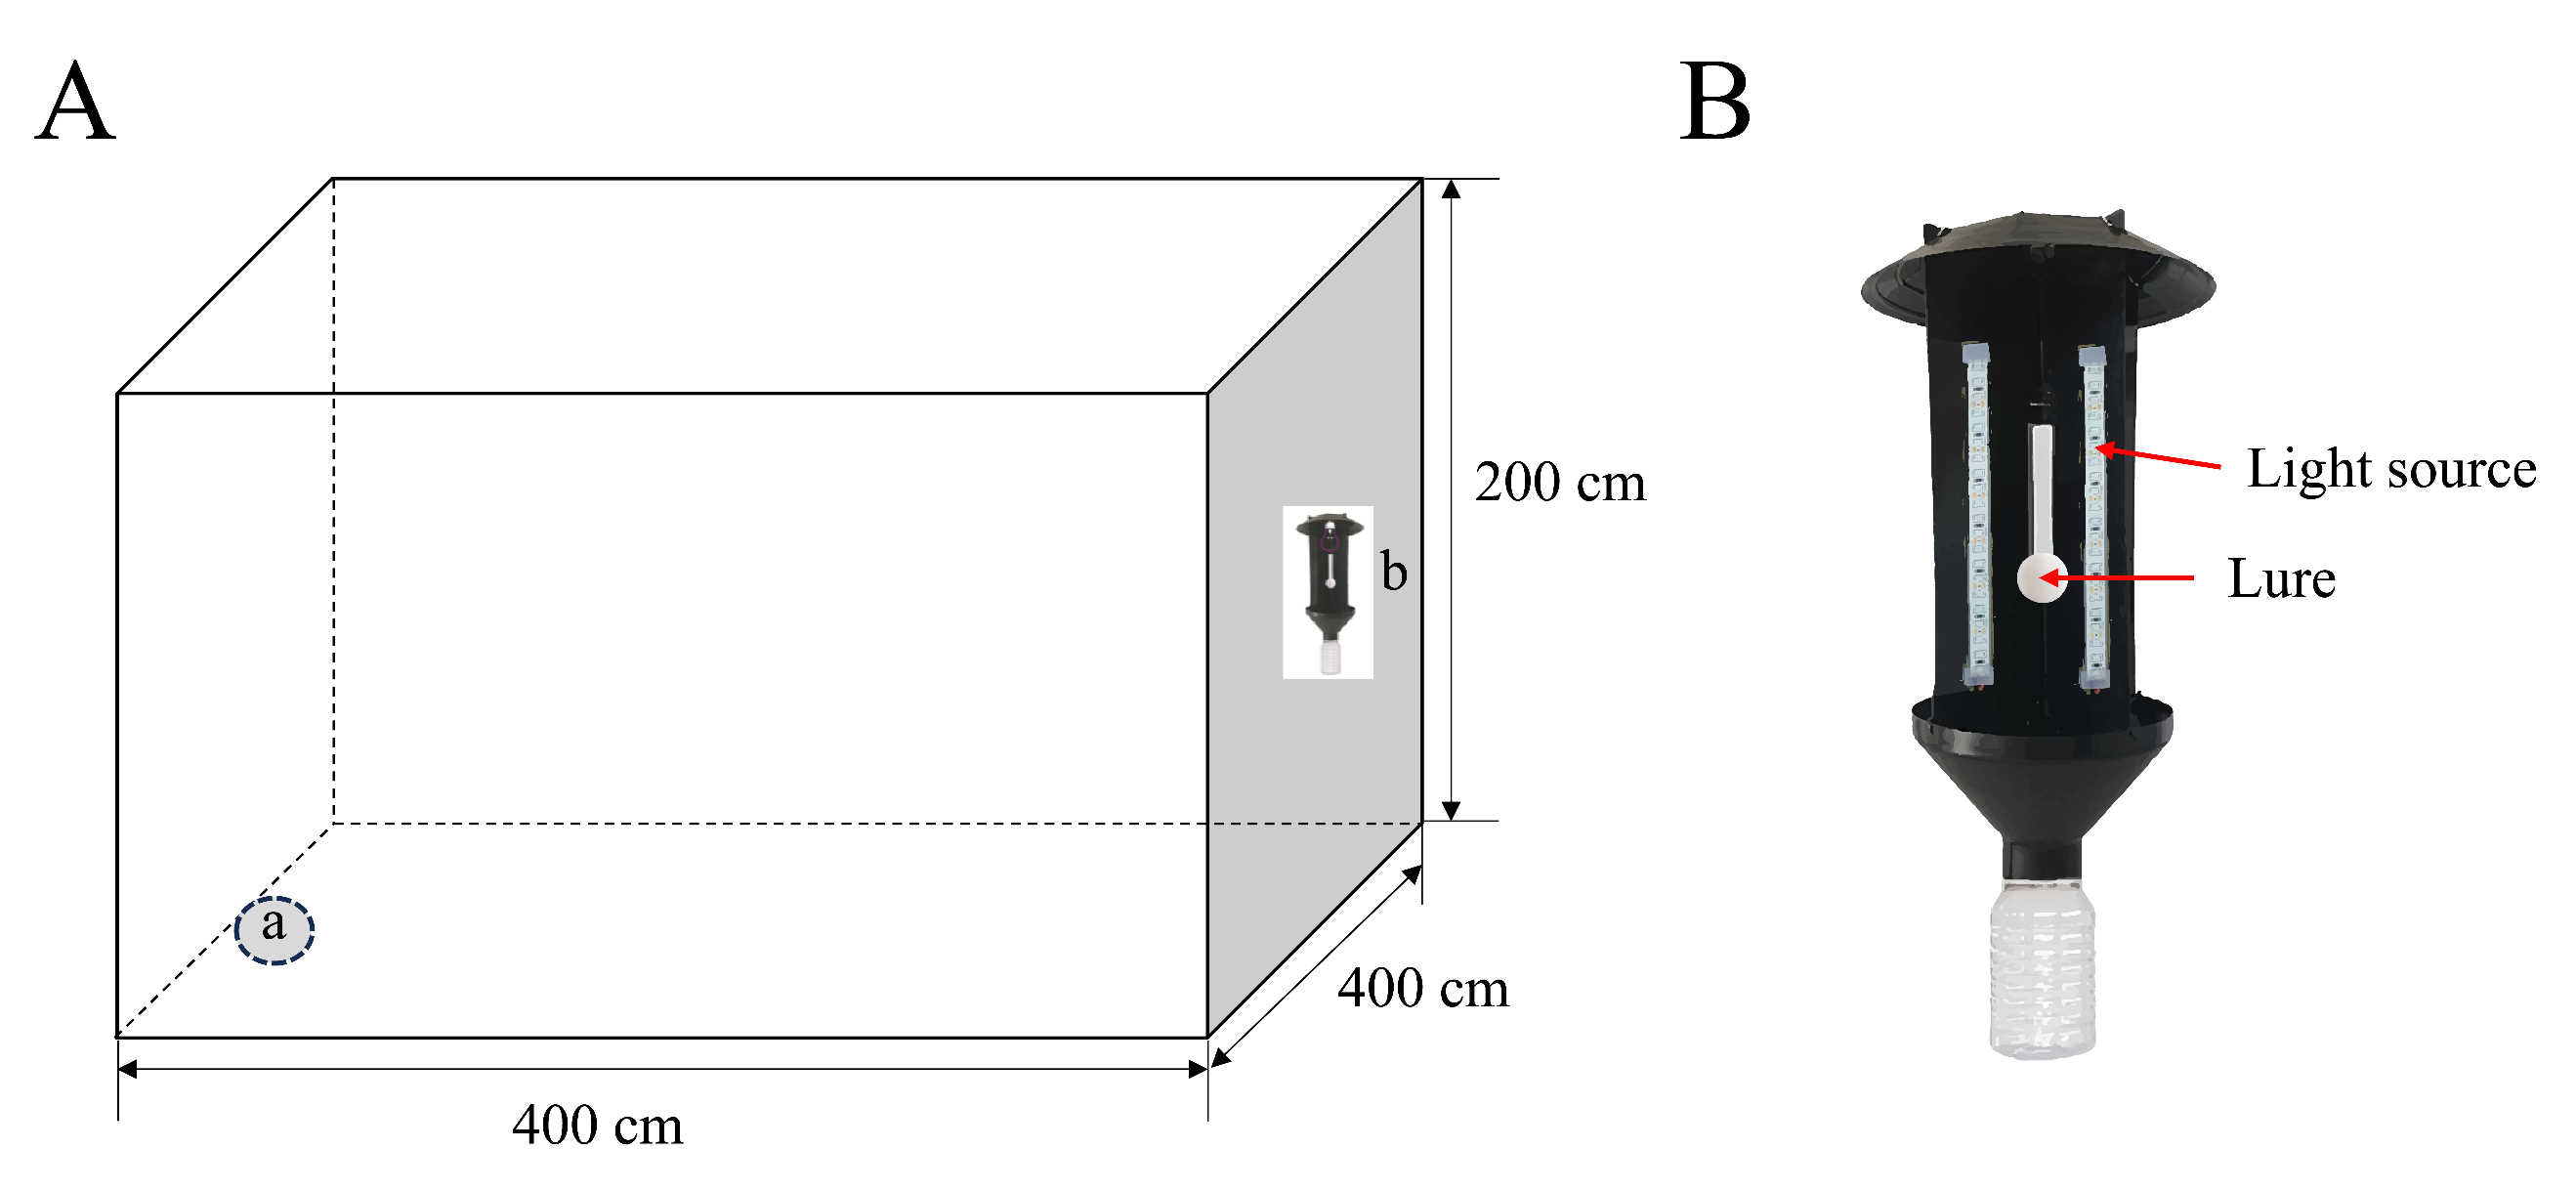


Fig. 2 Preference of female and male *A. glabripennis* for LED light with different wavelengths in six-way choice experiments. The first-choice responses of adults to the LED lights of different wavelengths were assessed by Chi-squared tests. Sample sizes: (A, B) n = 68 females, n = 63 males; (C–F) n = 30 per sex.


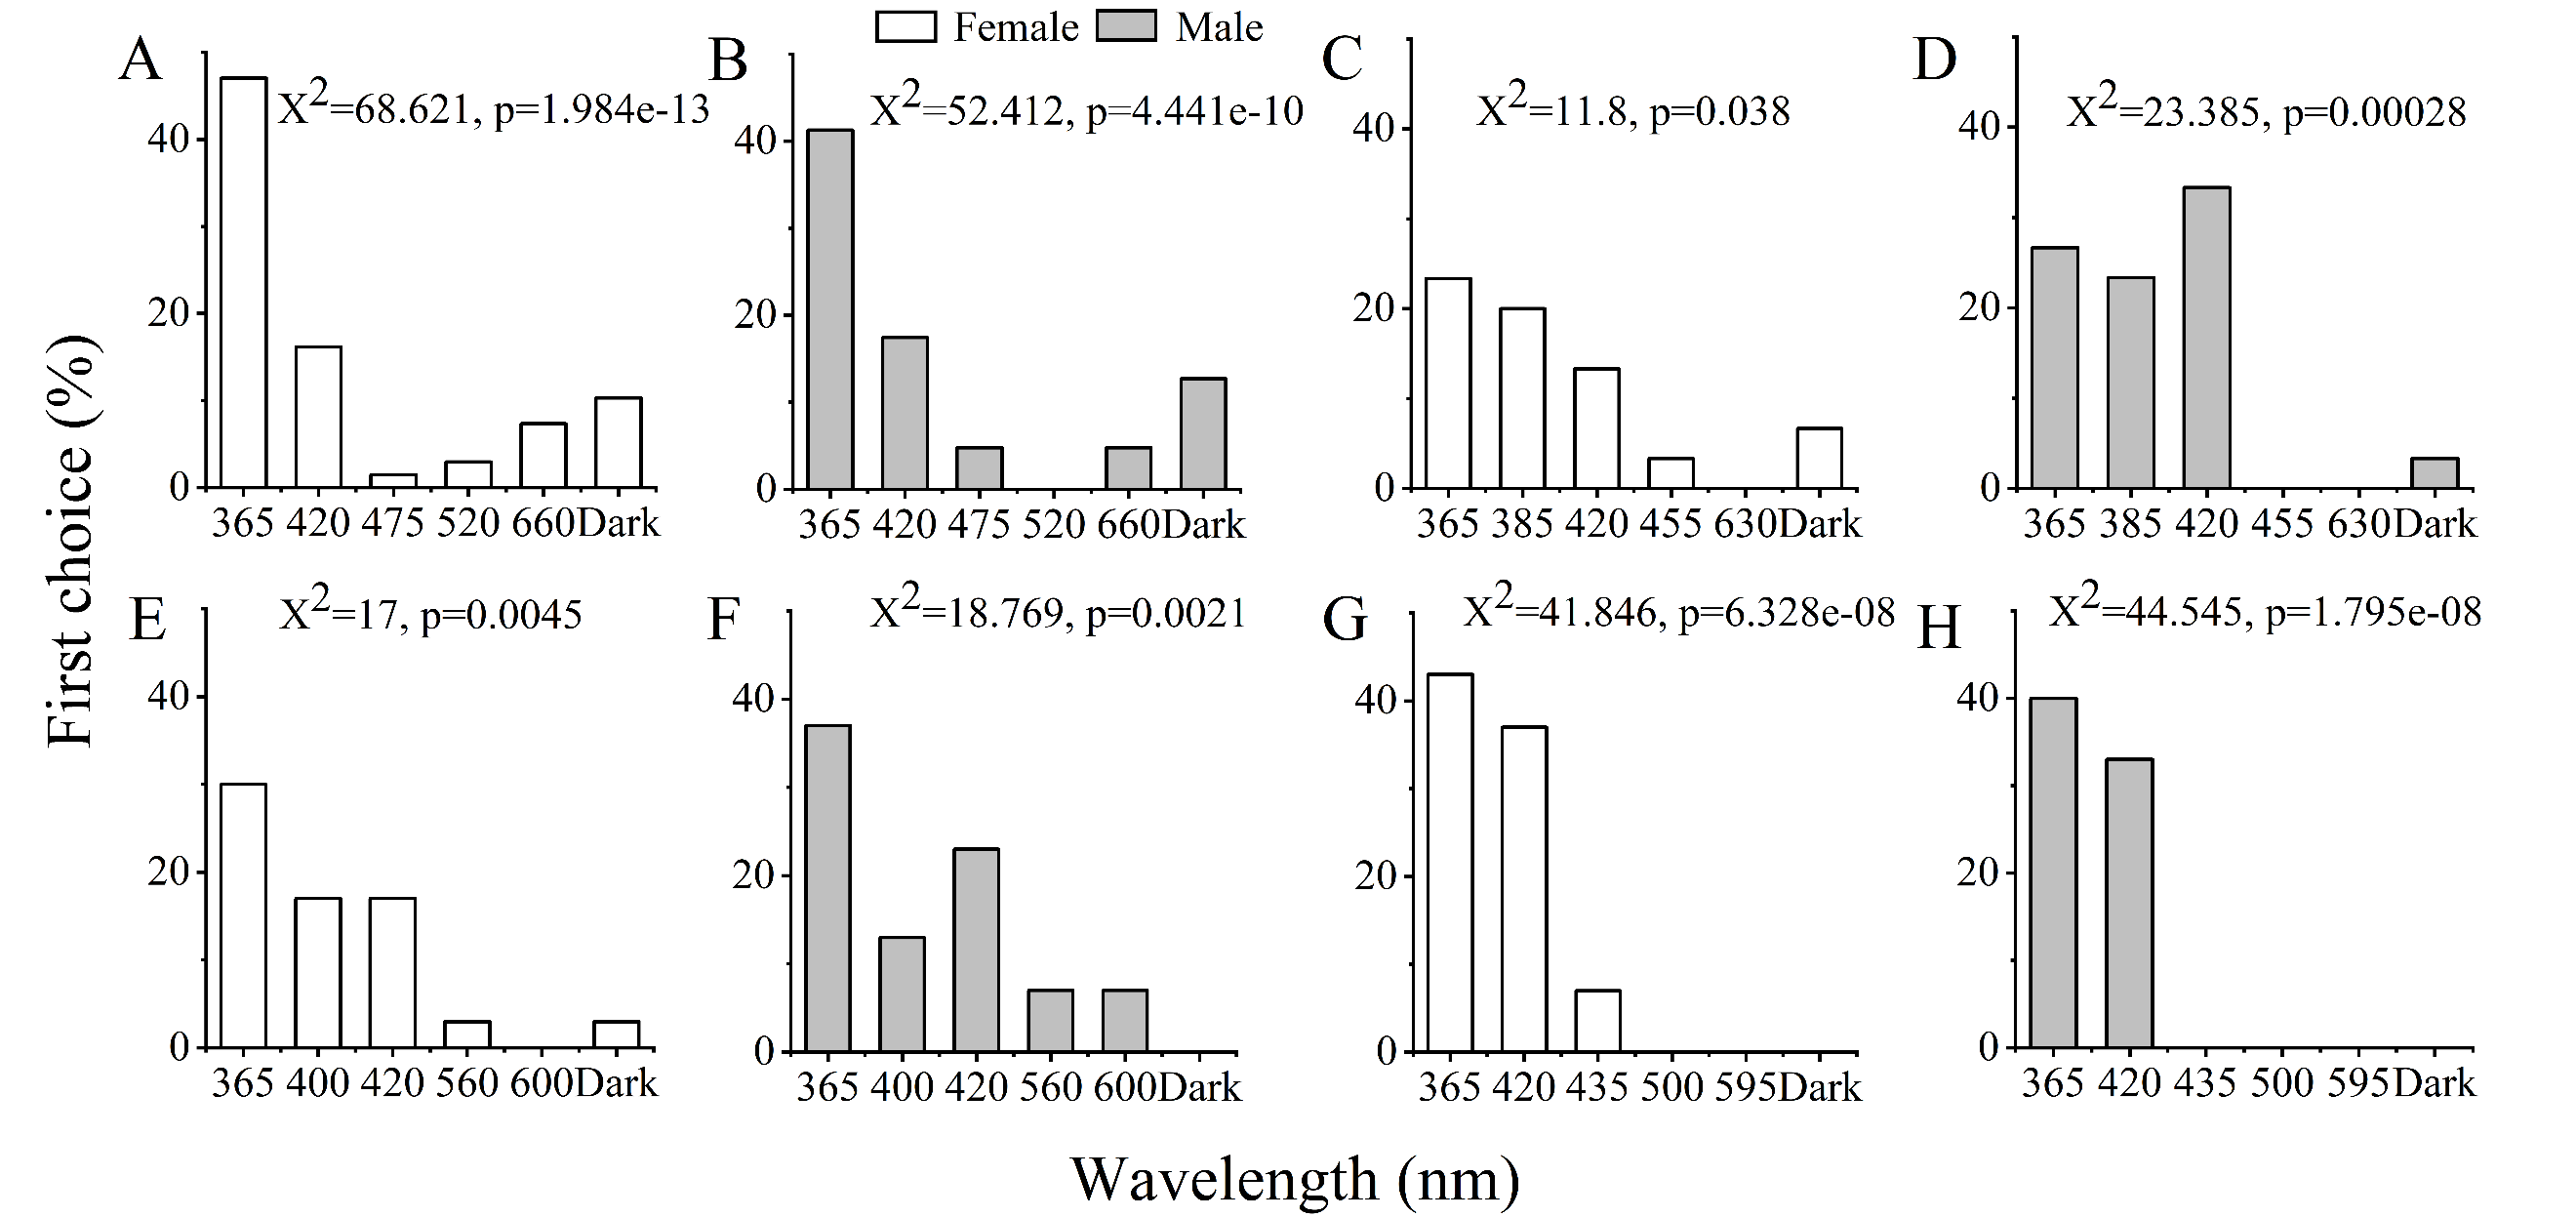


Fig. 3 Attraction rates of female and male *A. glabripennis* to three host plant volatiles (-) linalool (A), *D*-limonene (B) and *β*-caryophyllene (C) in a Y-tube olfactometer. Bioassays were conducted under white light or 365 nm UV LED illumination using 20 μL aliquots at concentrations of 0.1, 1, 10, or 100 μg/μL. For each combination of light regime and odor concentration, 50 males and 50 females were tested with linalool, while 30 males and 30 females were tested with *D*-limonene or *β*-caryophyllene. Asterisks denote significant response to treatments *vs.* controls (Chi-square tests, *p* < 0.05).


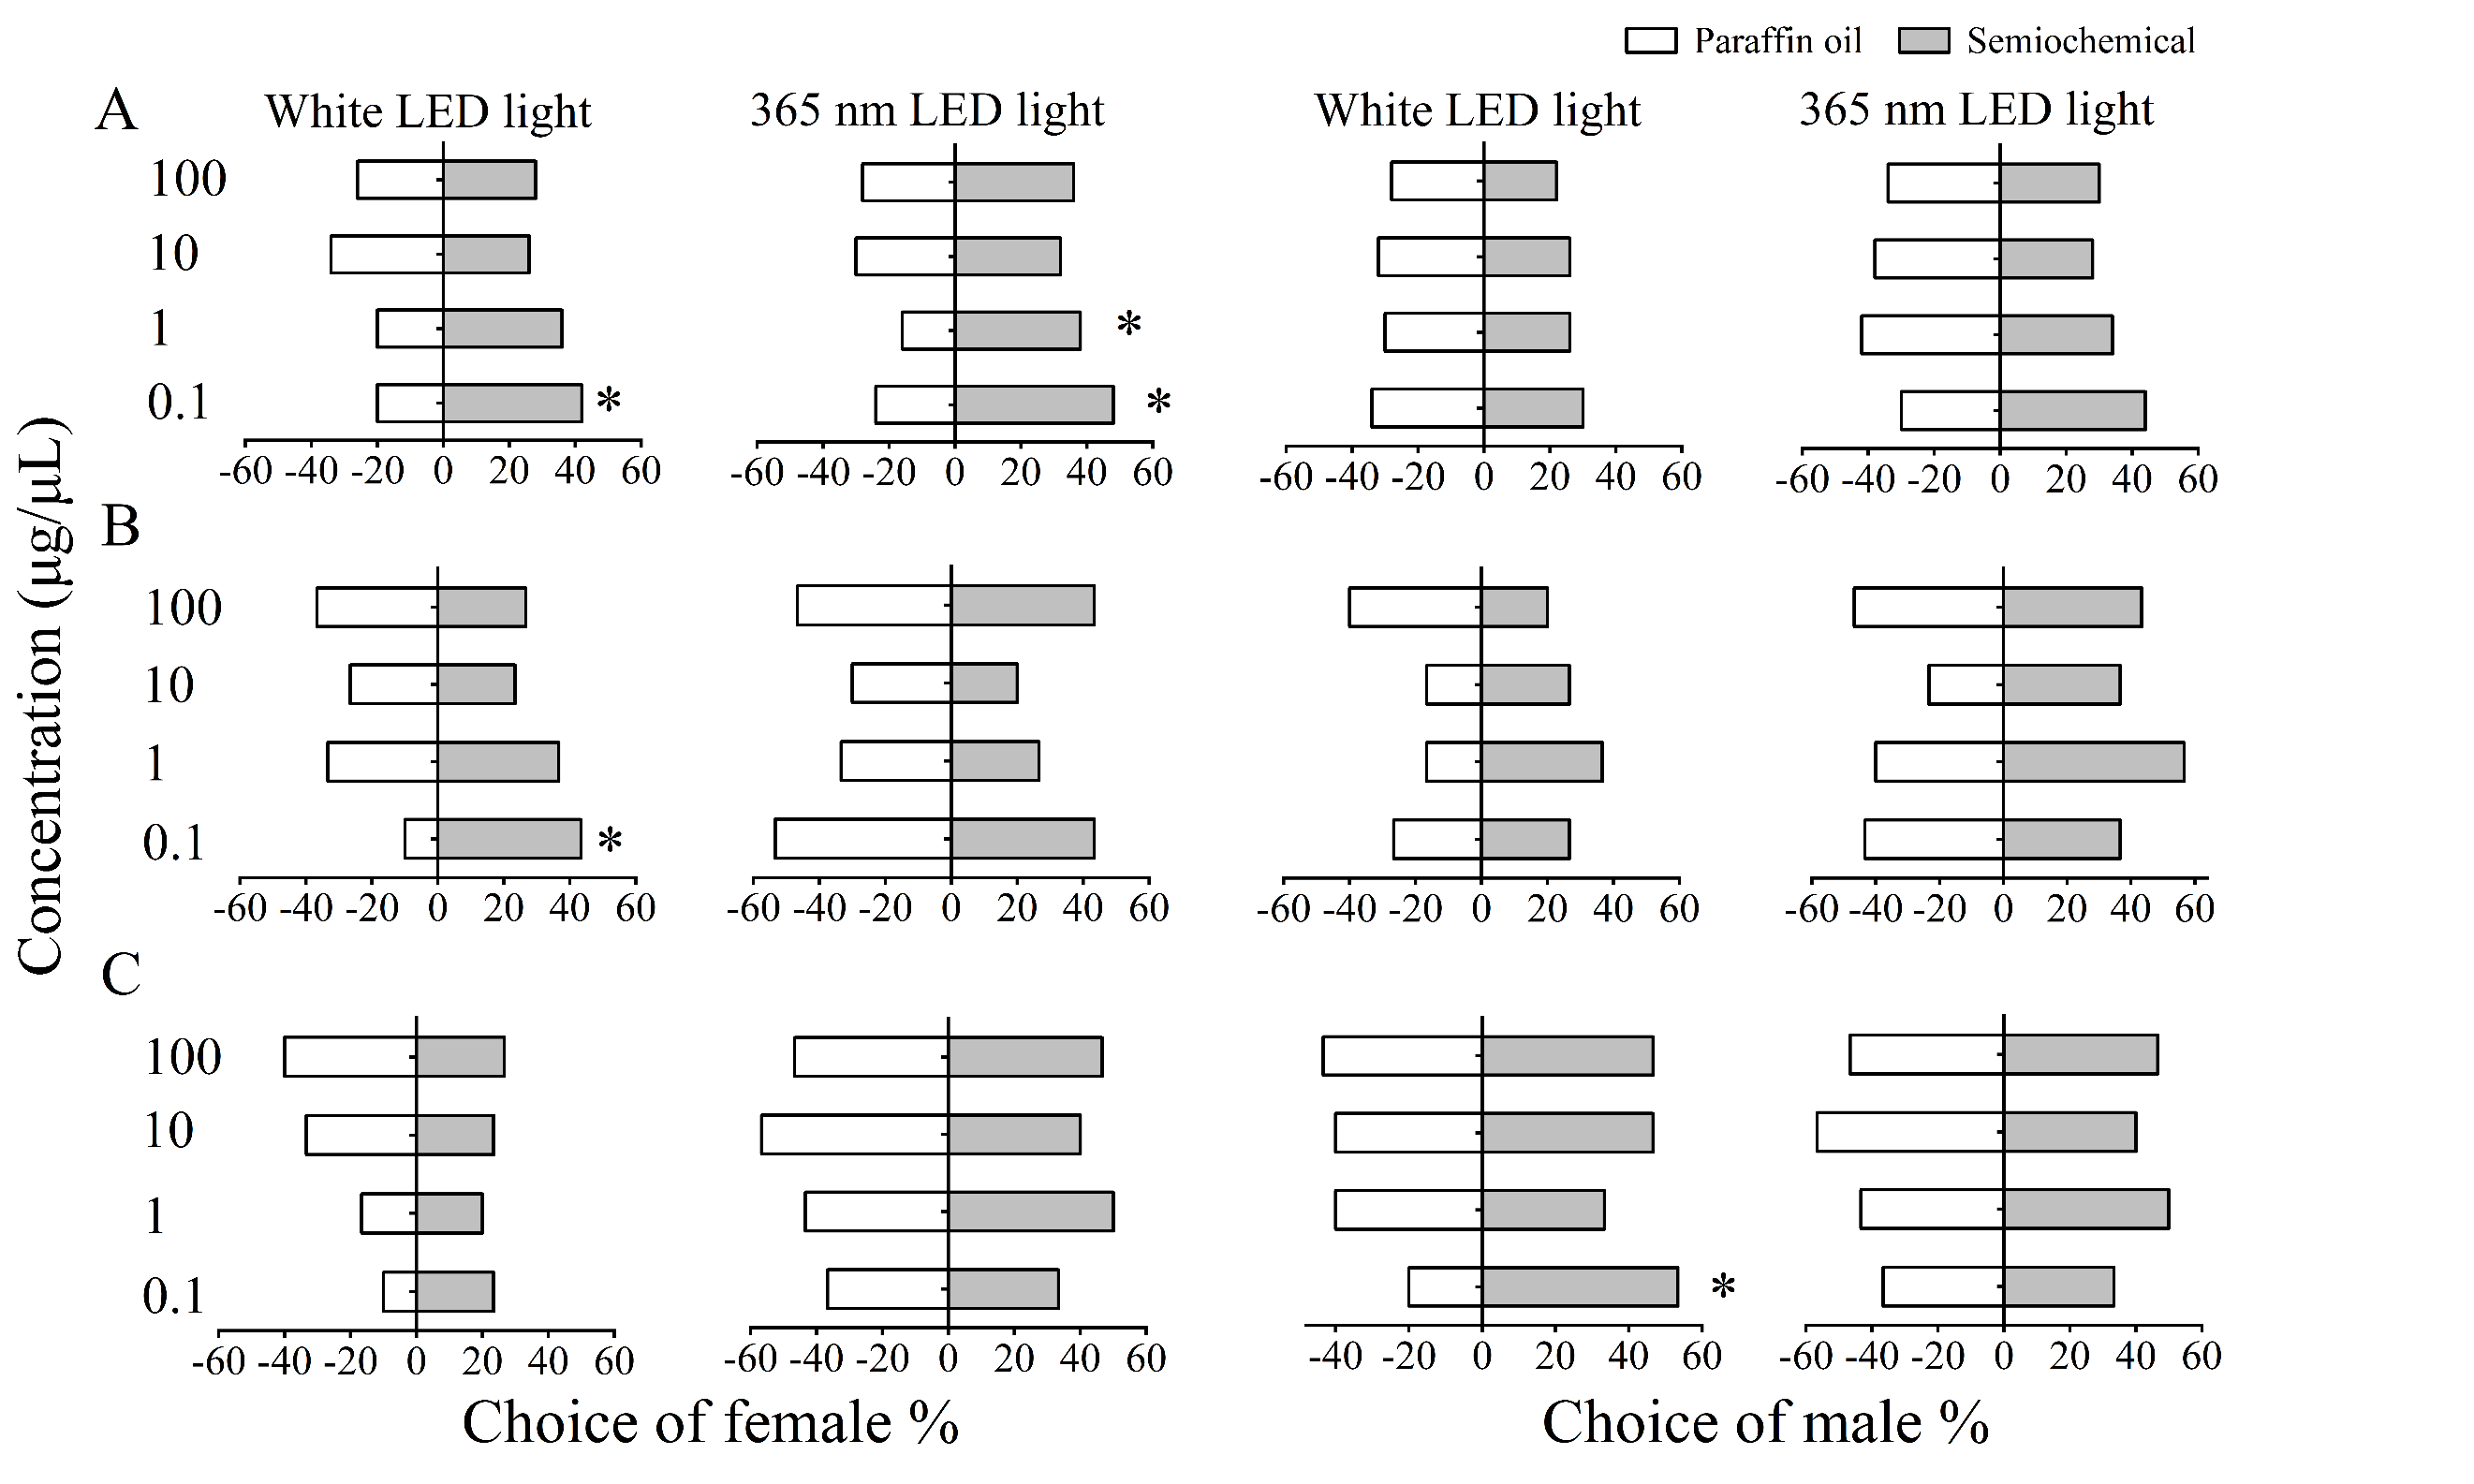


Fig. 4. The attraction rates of *A. glabripennis* females and males to sex pheromones and pheromone blends under different light conditions. Treatments included single compounds: (A) nonanal and (B) hexadecanal; and blends: (C) 4-(n-heptyloxy)butanol : 4-(n-heptyloxy)butanal (1:1), and (D) heptanal : nonanal : hexadecanal (1:7:1). Bioassays were conducted in a Y-tube olfactometer under white or 365 nm UV light using 20 μL loads at varying concentrations (0.1–100μg/μL). For each combination of concentration and light regime, sample sizes were n=30 per sex for single compounds (A, B) and n=50 per sex for pheromone blends (C, D). Asterisks denote significant response to treatments *vs.* controls (Chi-square tests, **p* < 0.05; ** *P <* 0.01, ***: *p* < 0.001).


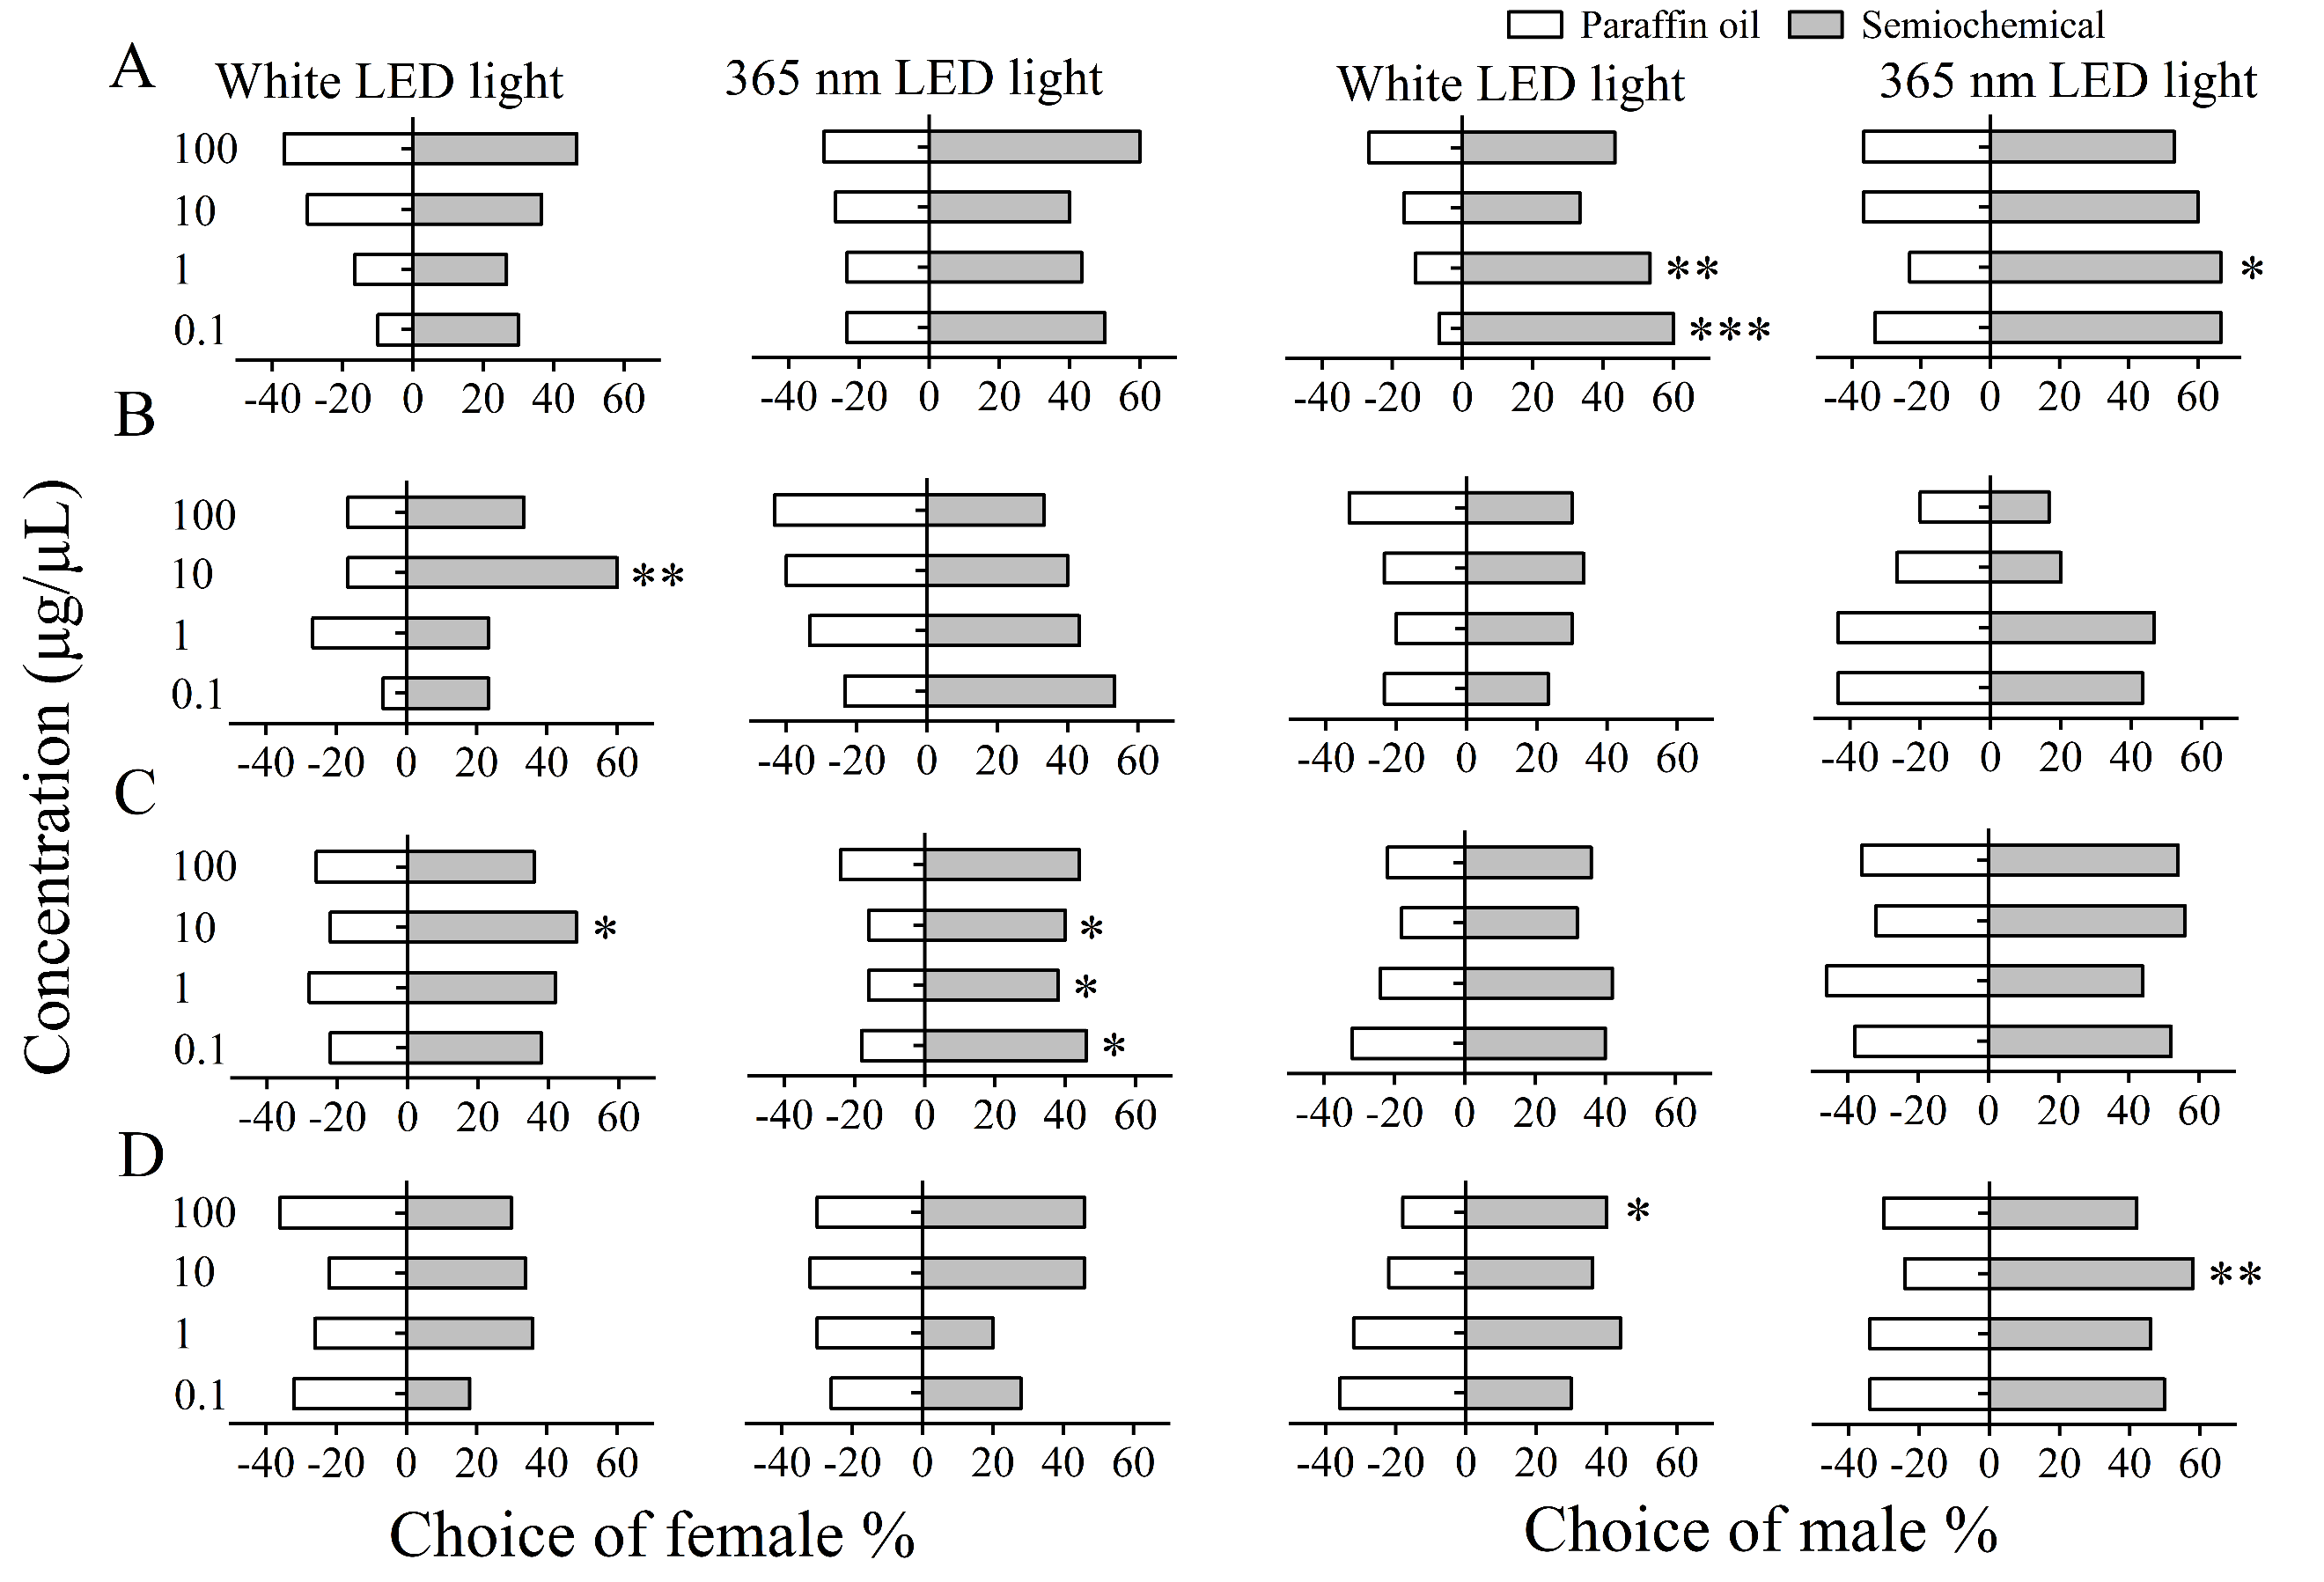


Fig. 5. Attraction responses of females (A) and males (B) to different semiochemicals under 365 nm LED light. MPP indicates male-produced pheromone blend of 4-(n-heptyloxy) butanal and 4-(n-heptyloxy)butanol (1:1), and FPP indicates female-produced pheromoneblend of heptanal, nonanal, and hexadecanal (1:7:1). P < 0.05 (*), P > 0.05 (ns) based on Chi-squared tests (n=30).


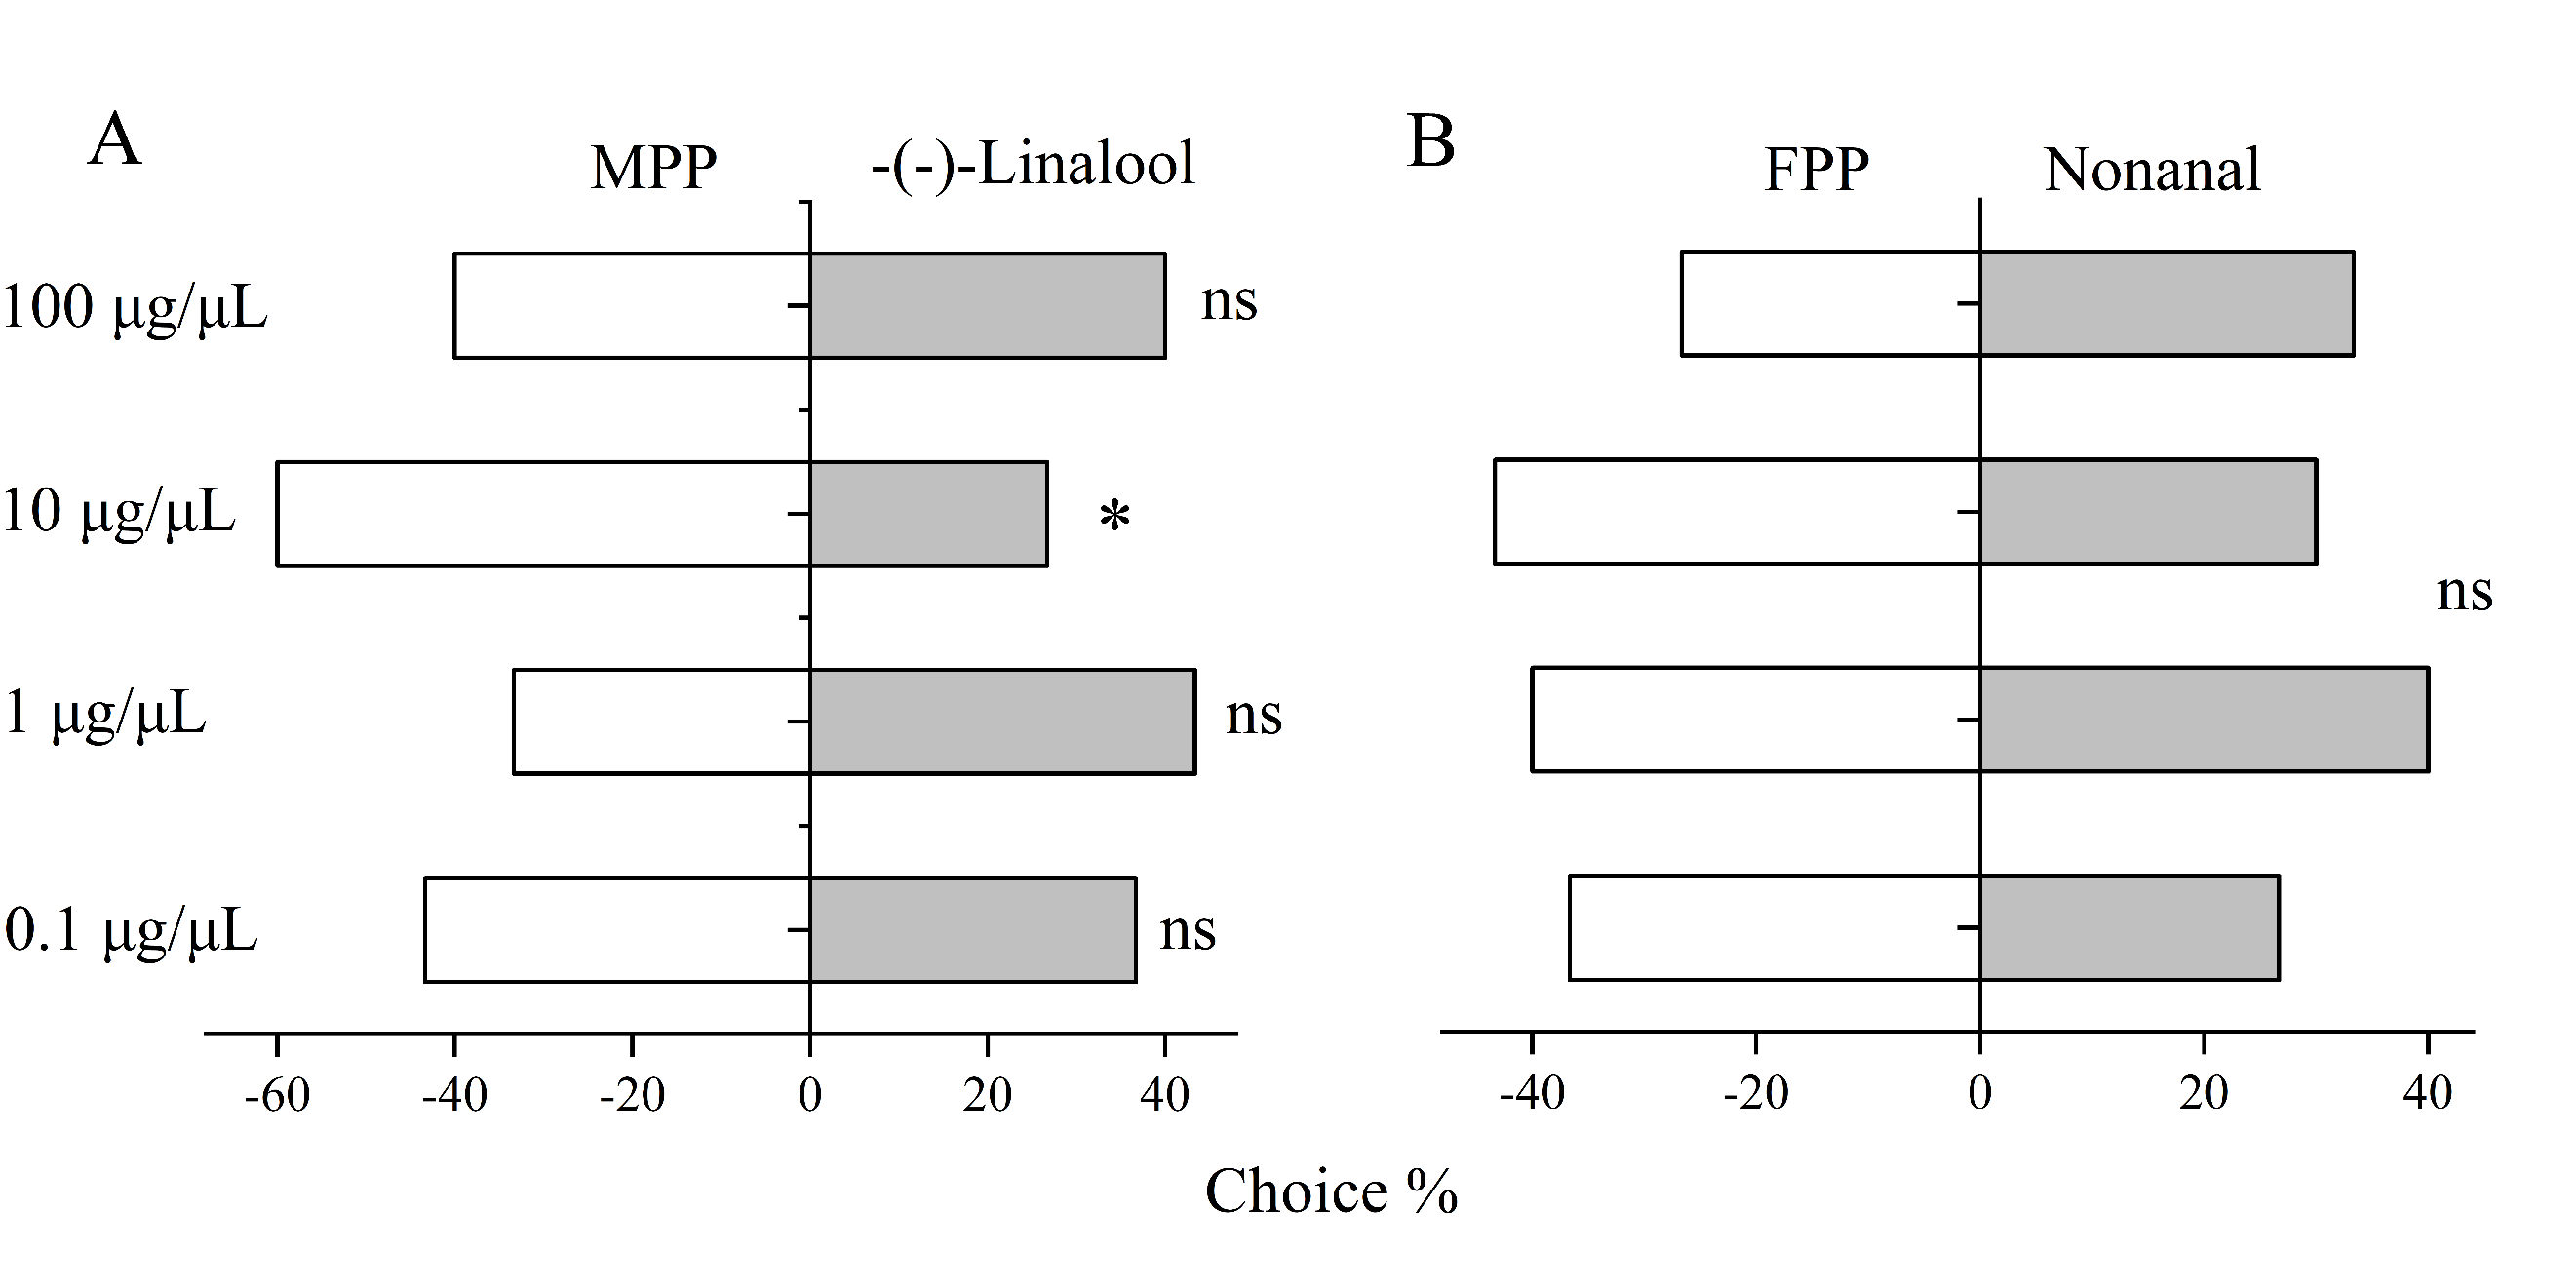


Fig. 6. Spatiotemporal dynamics of female *A. glabripennis* in different trapping treatments. (A) Activity trajectories and (B) spatial distribution recorded at 30-min intervals (30–180 min). MPP: Male-produced pheromone blend [4-(n-heptyloxy)butanal : 4-(n-heptyloxy)butanol, 1:1]. FPP: Female-produced pheromone blend [heptanal : nonanal : hexadecanal, 1:7:1]. Black dots represent the pooled positions of all tested individuals (n=100). Different letters above bars in Figure B indicate significant differences according to the GLM, followed by the Tukey-Kramer test (n=5).


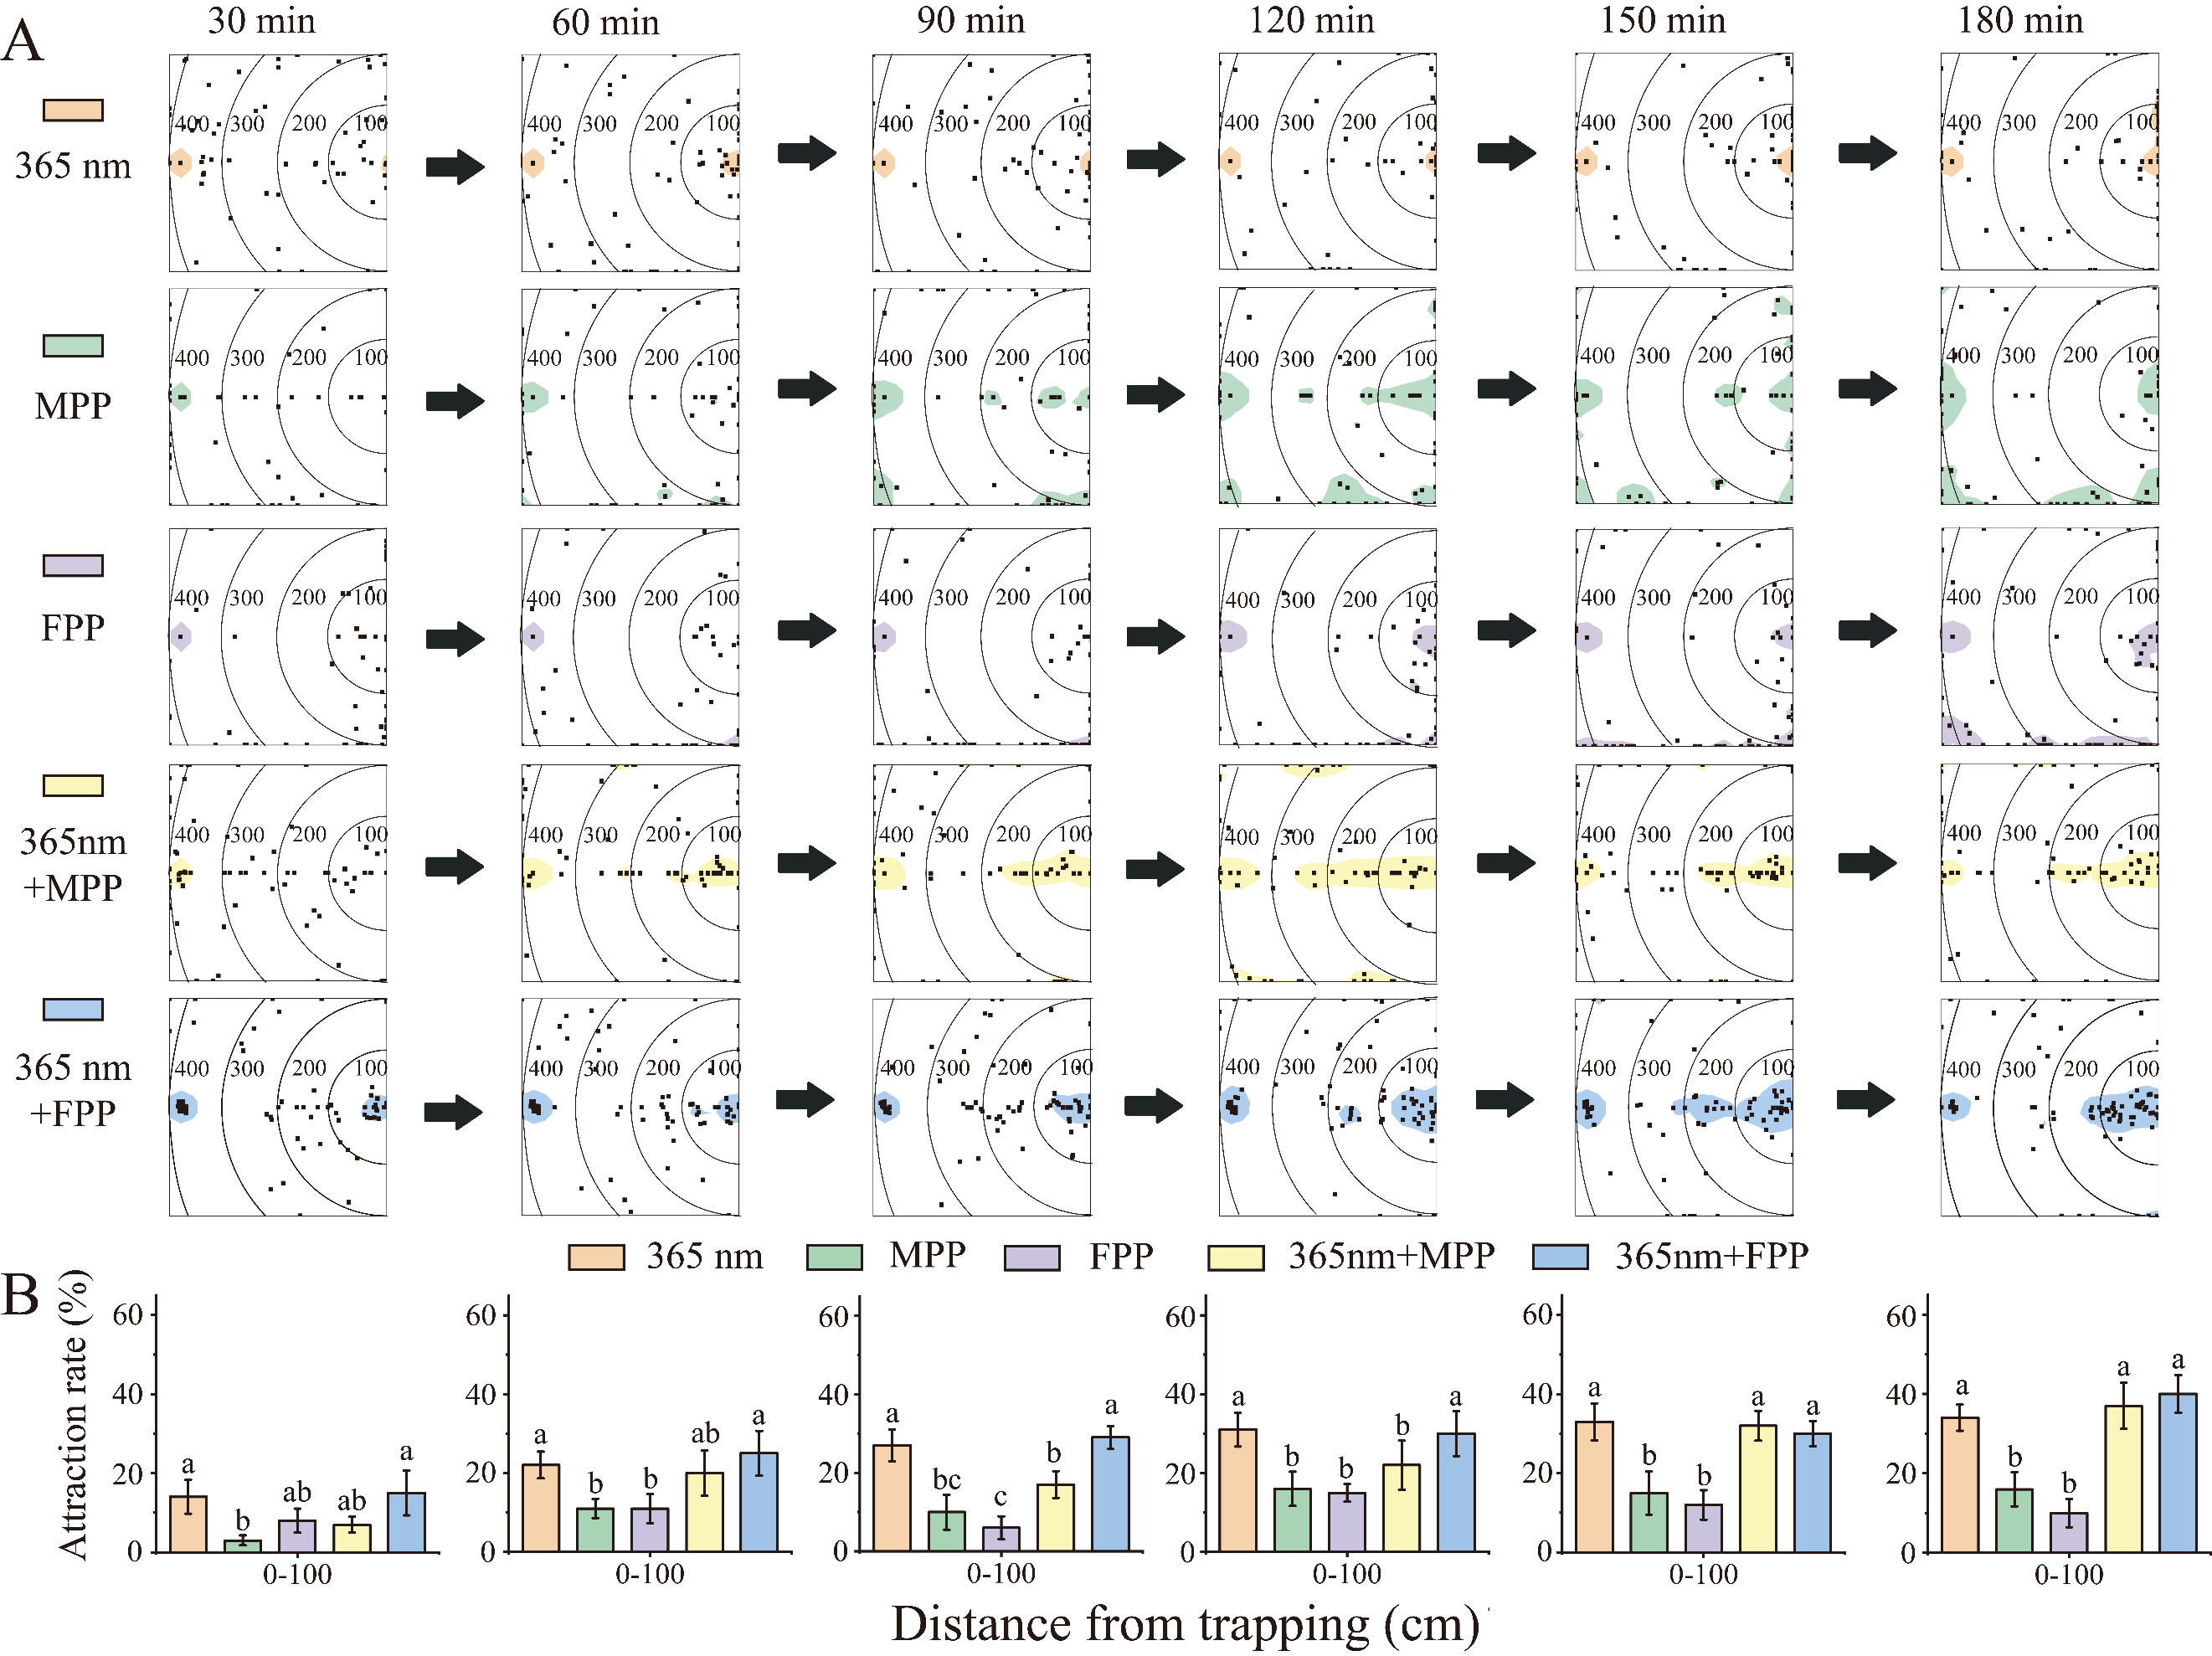


Fig. 7. Spatiotemporal dynamics of male *A. glabripennis* in different trapping treatments. (A) Activity trajectories and (B) spatial distribution recorded at 30-min intervals (30–180 min). MPP: Male-produced pheromone blend [4-(n-heptyloxy)butanal : 4-(n-heptyloxy)butanol, 1:1]. FPP: Female-produced pheromone blend [heptanal : nonanal : hexadecanal, 1:7:1]. Black dots represent the pooled positions of all tested individuals (n=100). Different letters above bars in Figure B indicate significant differences according to the GLM, followed by the Tukey-Kramer test (n=5).


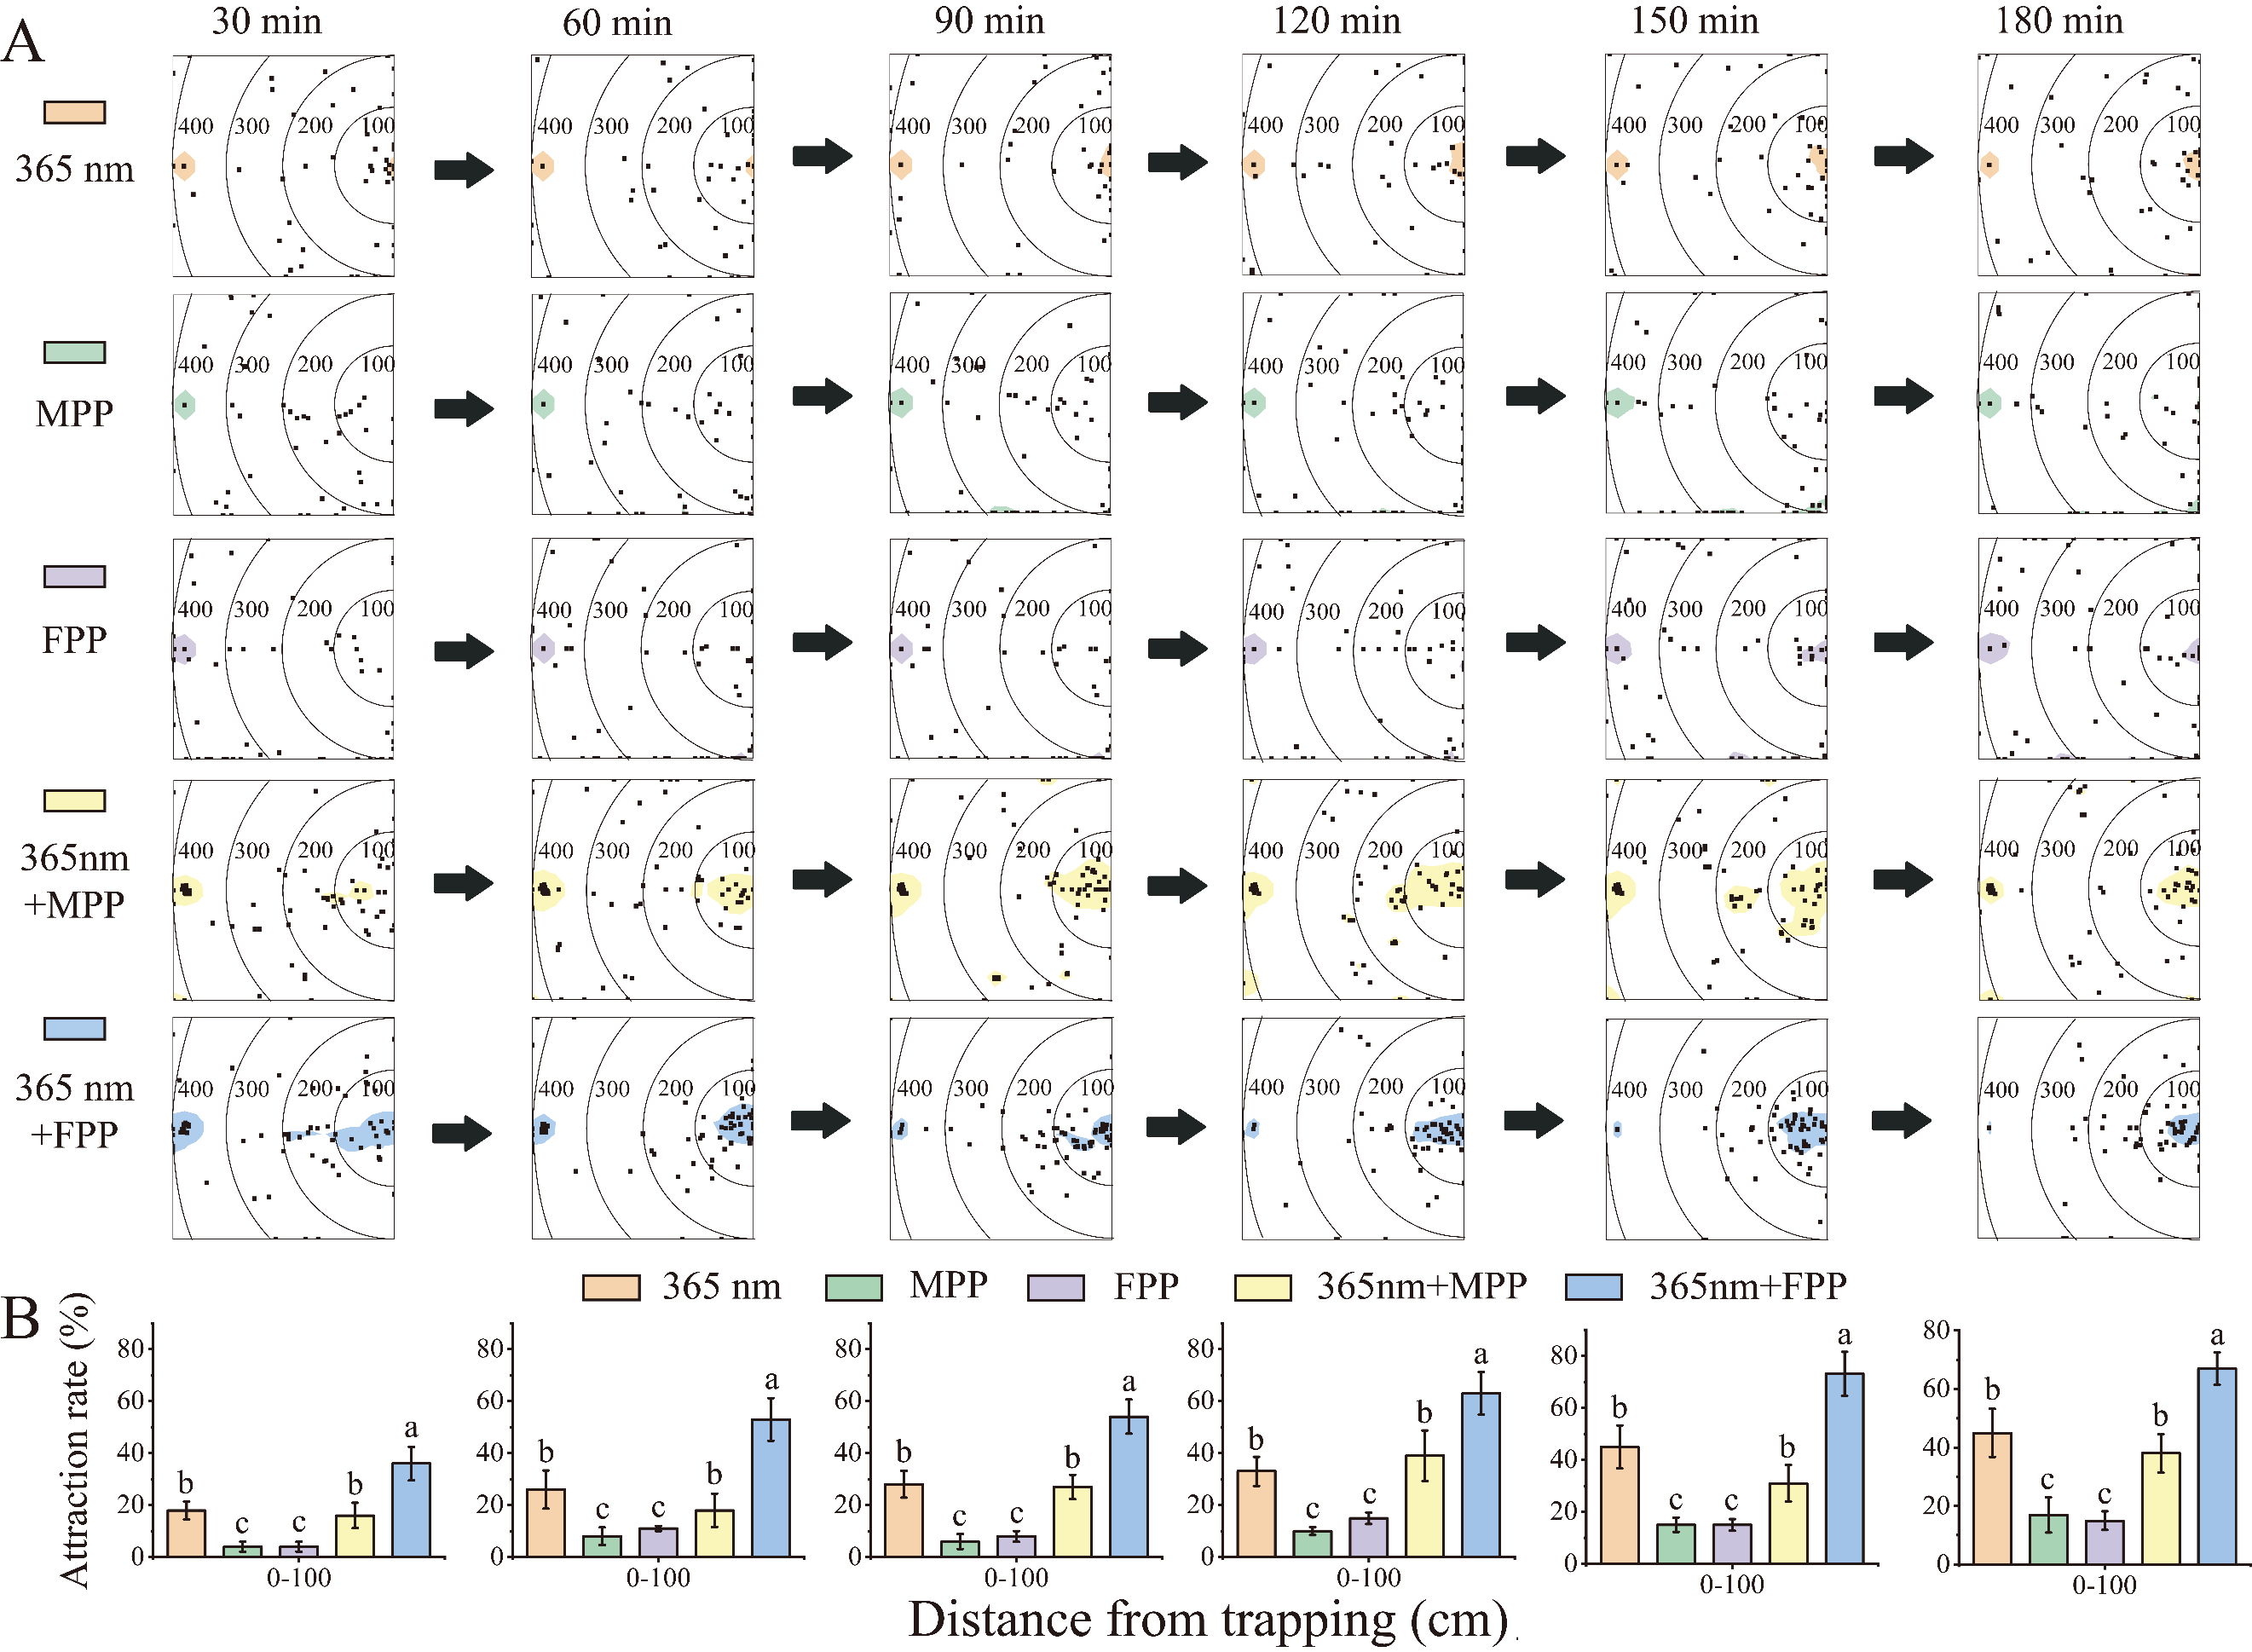


Fig. 8. Mean number of males and females captured under various treatments in semi-field trials at 30-min intervals (30–180 min). Panels A–F represent observations from 30 to 180 min, respectively (n=5). MPP：male-produced pheromone blend [ 4-(n-heptyloxy) butanal : 4-(n-heptyloxy)butanol [1:1], and FPP indicates female-produced pheromone blend of heptanal, nonanal, and hexadecanal (1:7:1). The different letters on the top of the bar indicate significant differences according to the GLM, followed by the Tukey-Kramer test (p<0.05).


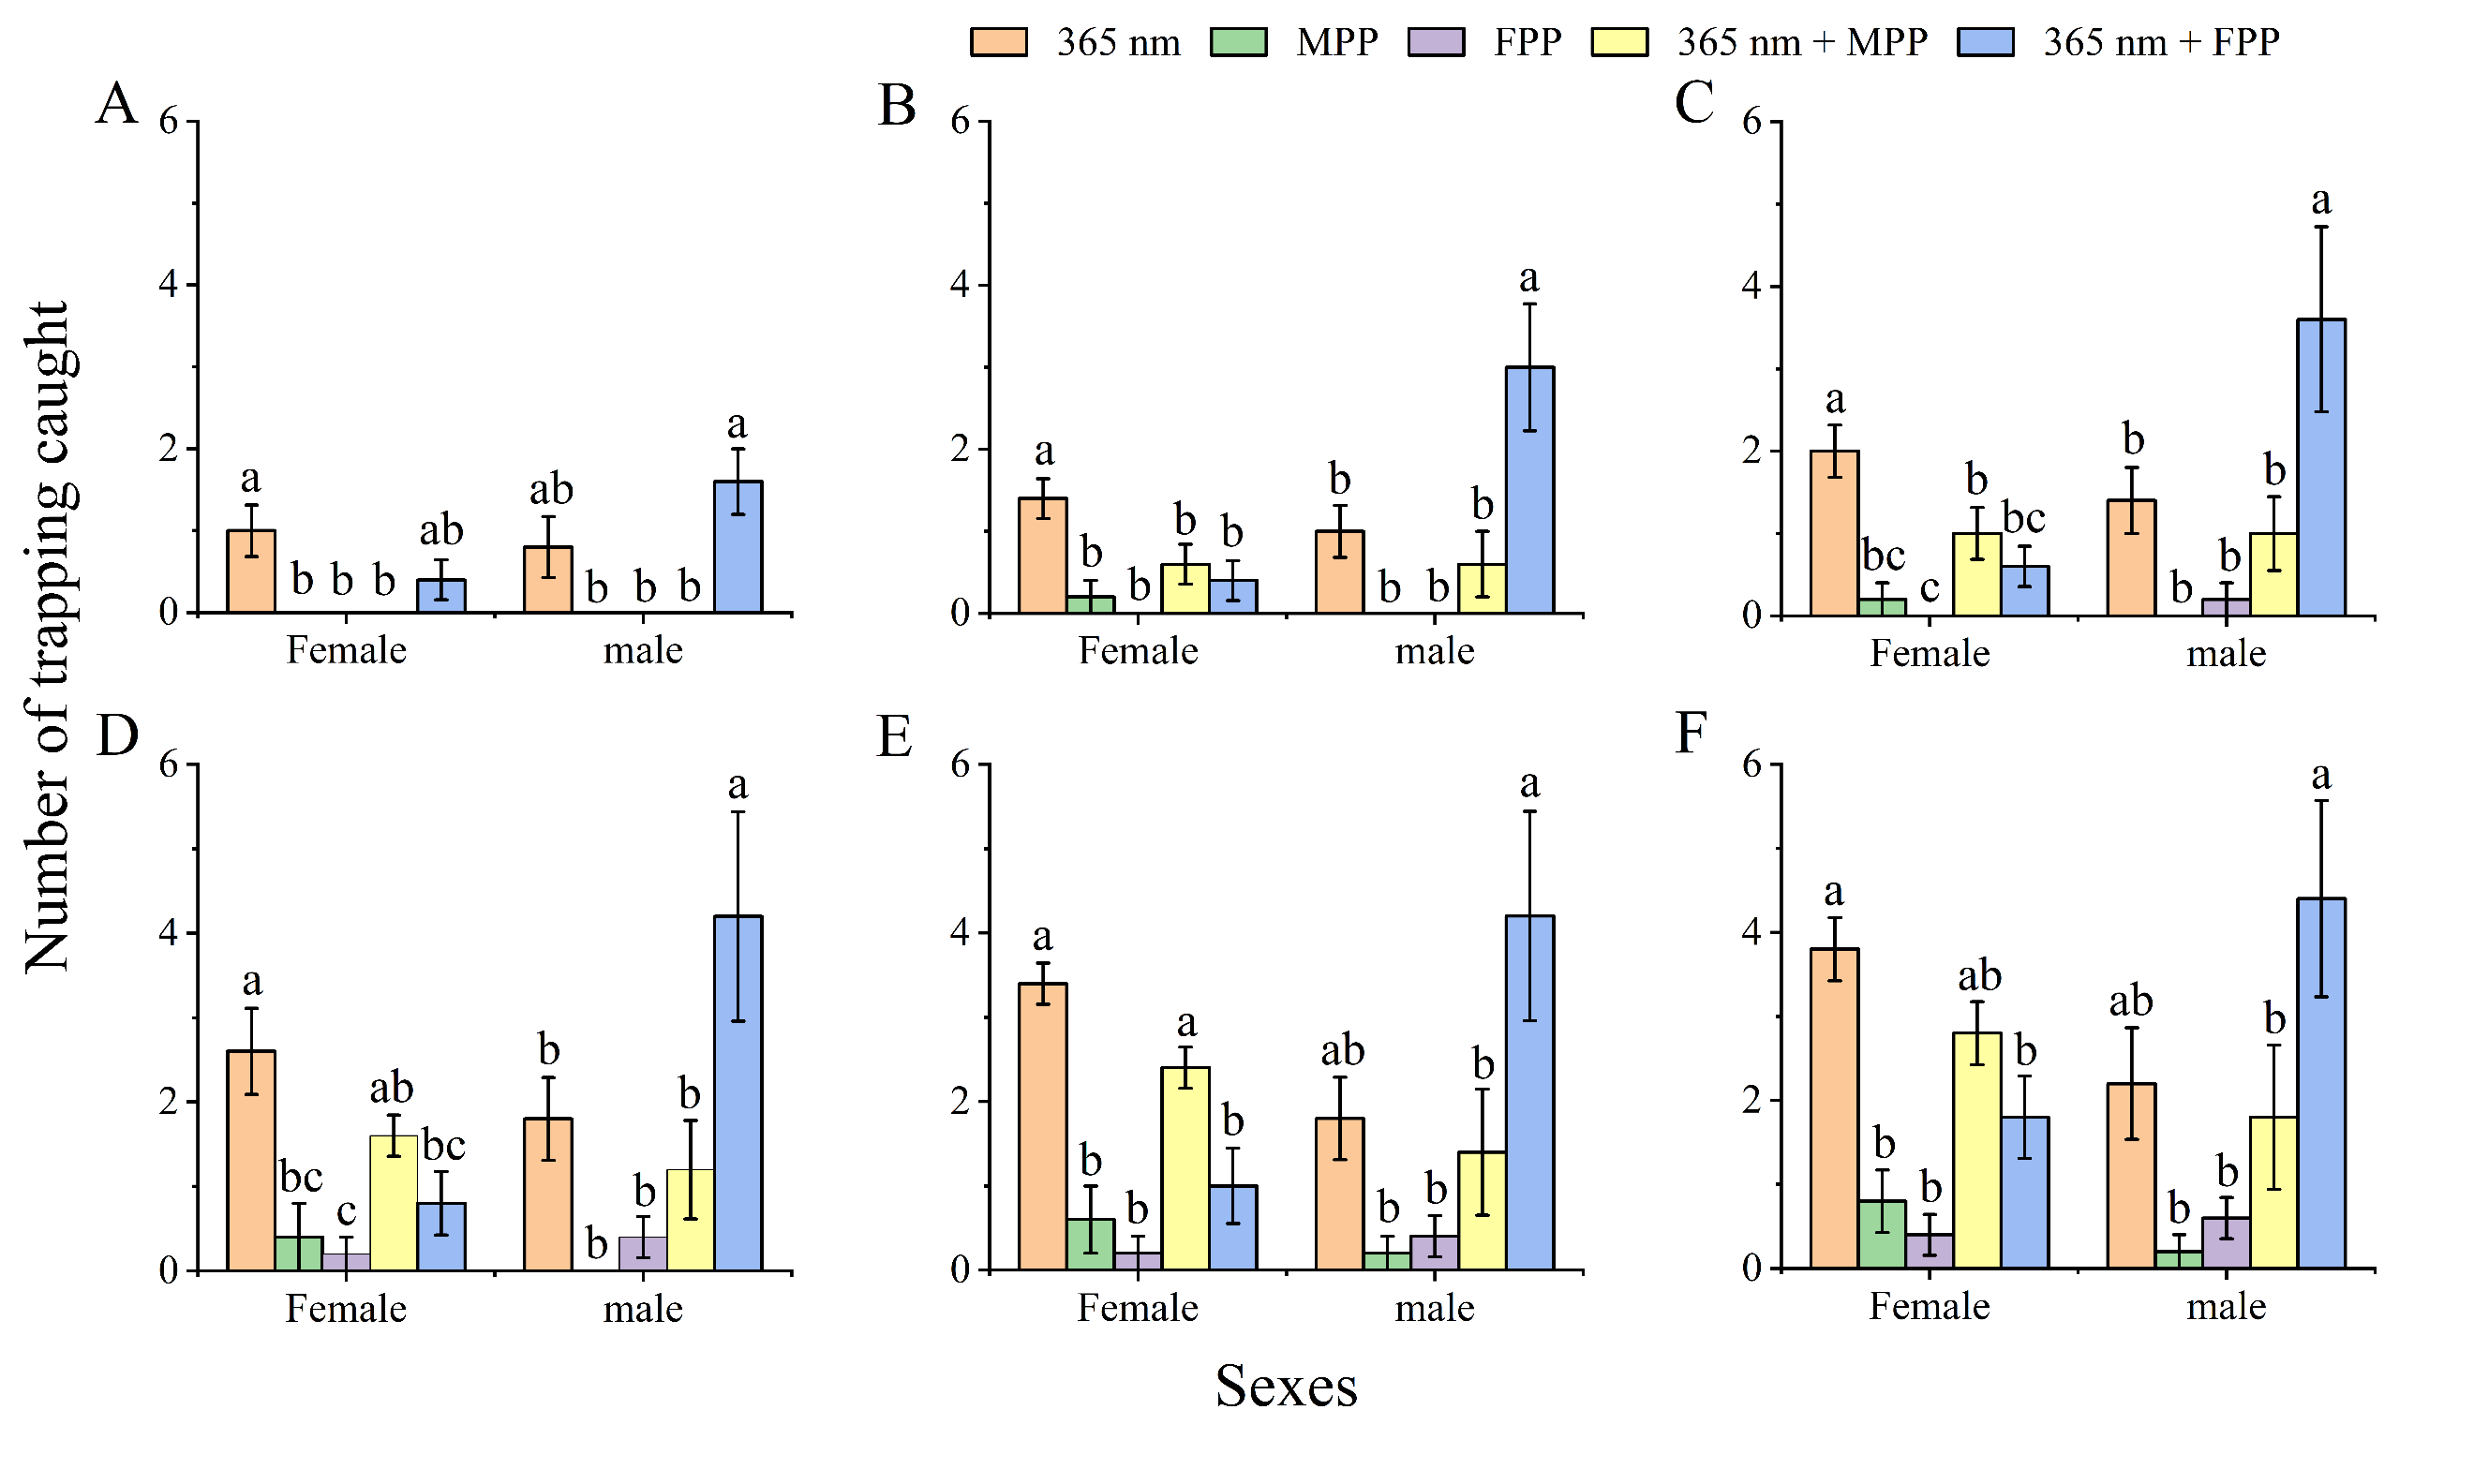


Fig.9 Field trapping efficacy of different treatments in the field experiments in Dingzhou (A) and Cangzhou (B). Data represent the mean number of adult *A. glabripennis* captured per trap. FPP indicates female-produced pheromones blend of heptanal, nonanal, and hexadecanal (1:7:1). Different letters above bars indicate significant differences among treatments (GLM followed by Tukey-Kramer test p<0.05; n=6).


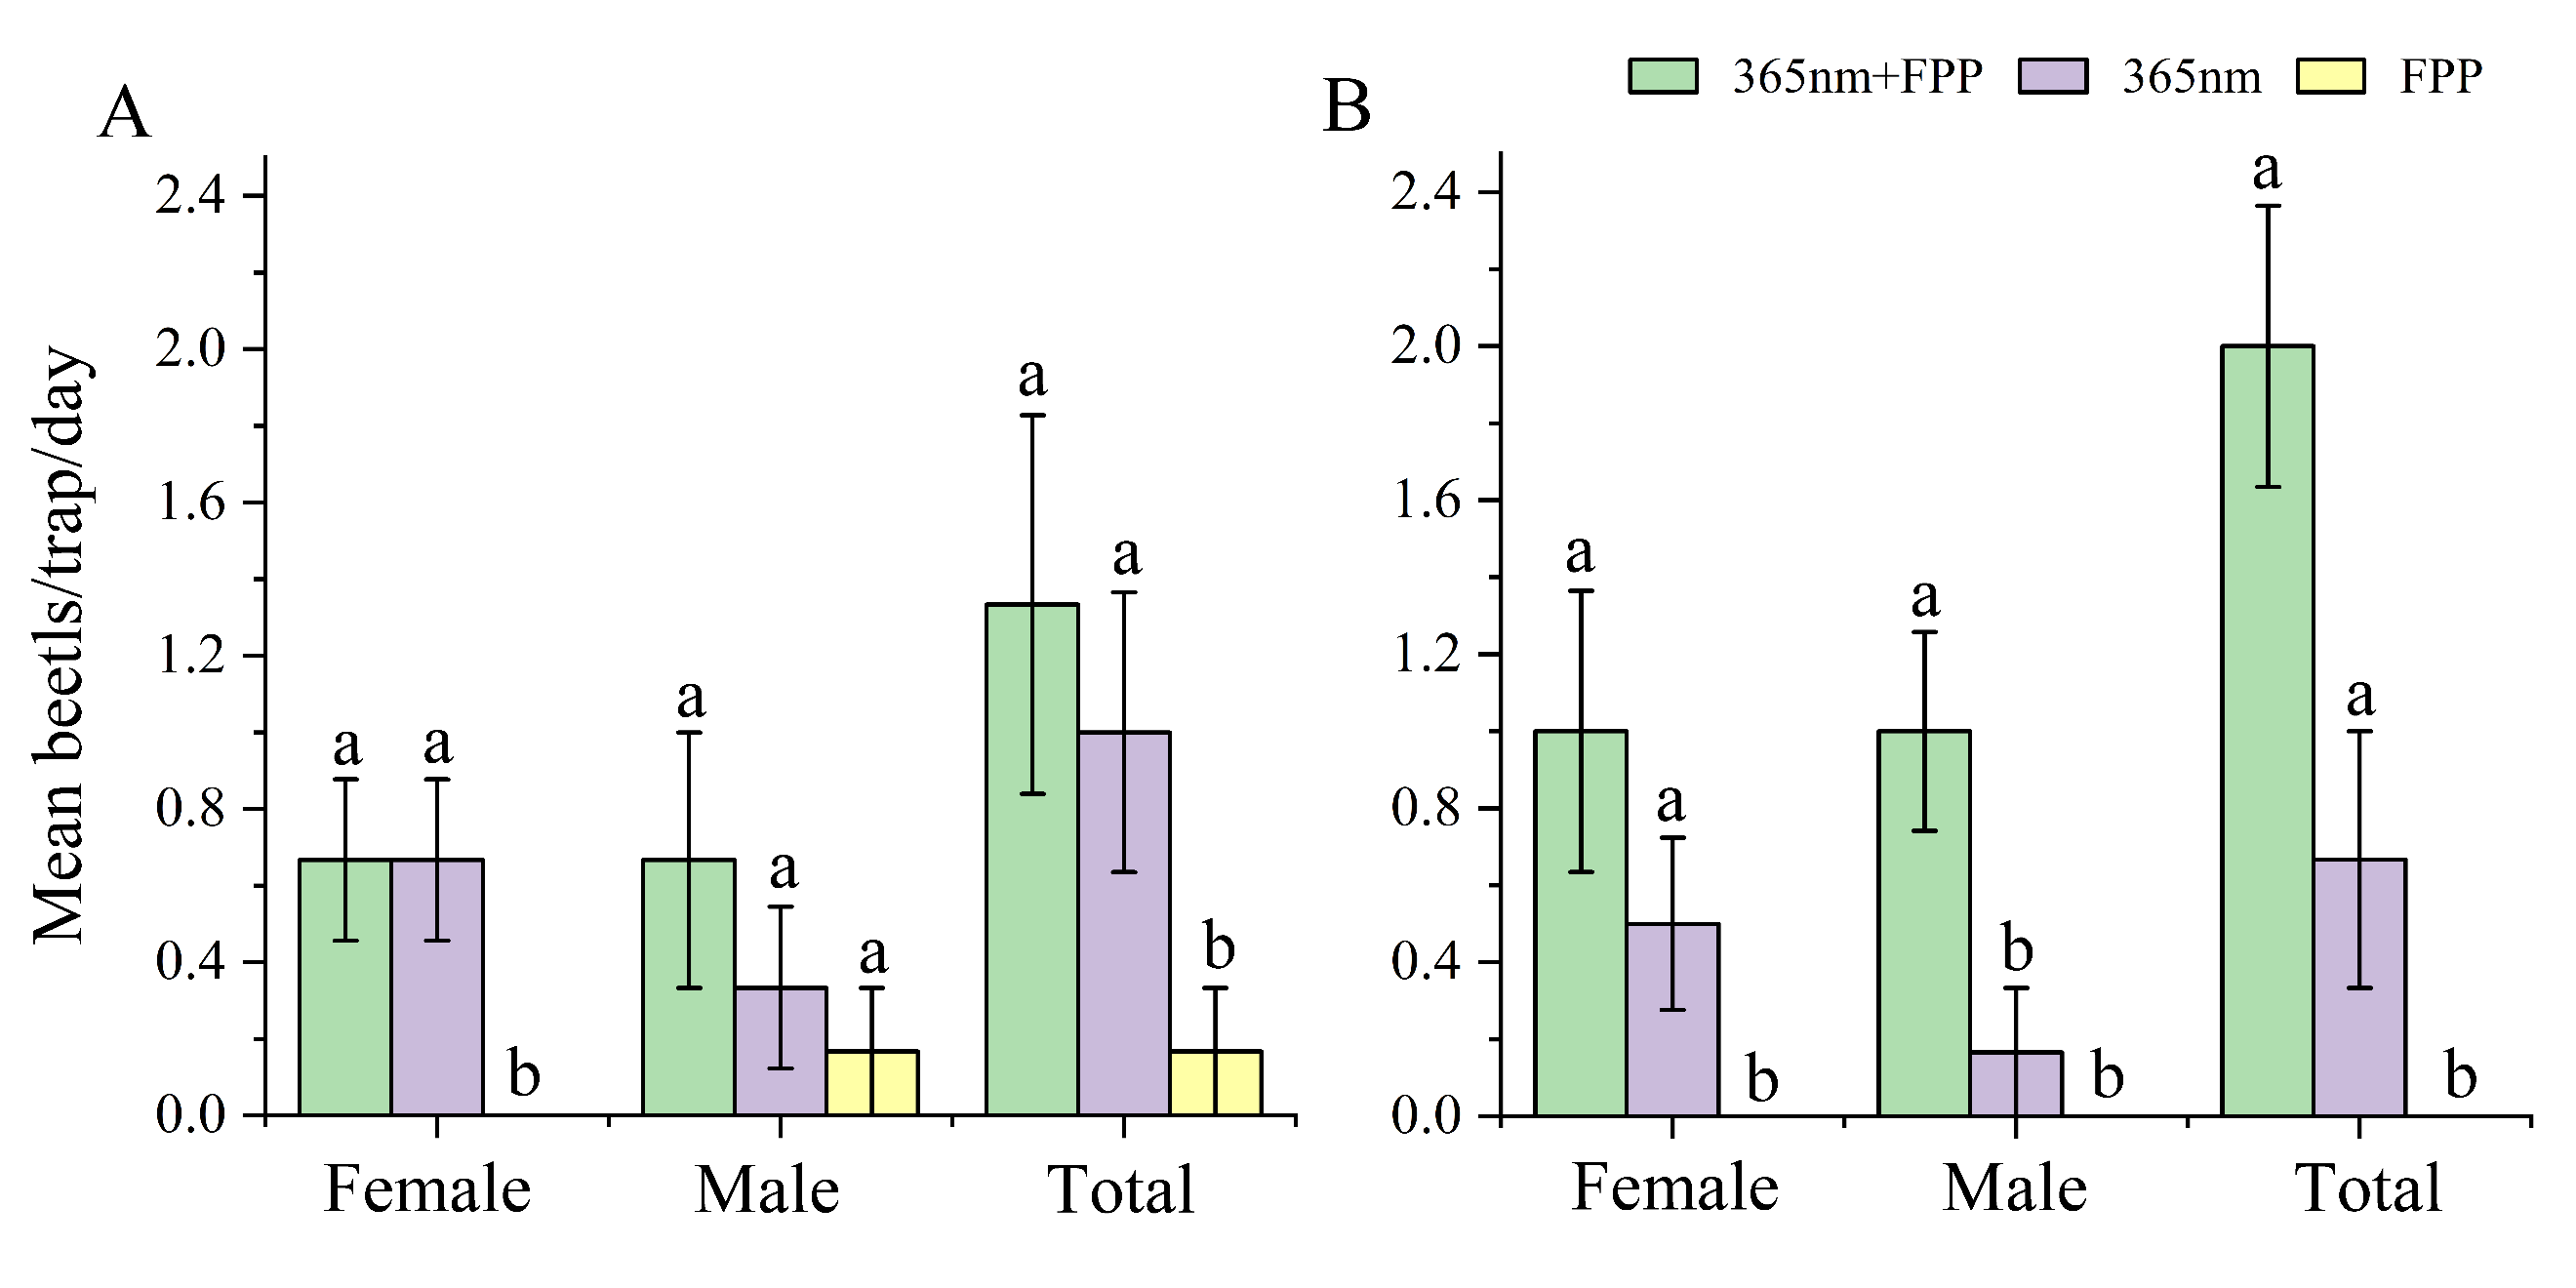


Fig. 10 A multimodal trapping strategy was developed, integrating 365 nm LED lights with semiochemicals. By providing simultaneous visual and olfactory signals, this method delivers both long-range and short-range cues to maximize the capture efficiency of adult *A. glabripennis*.


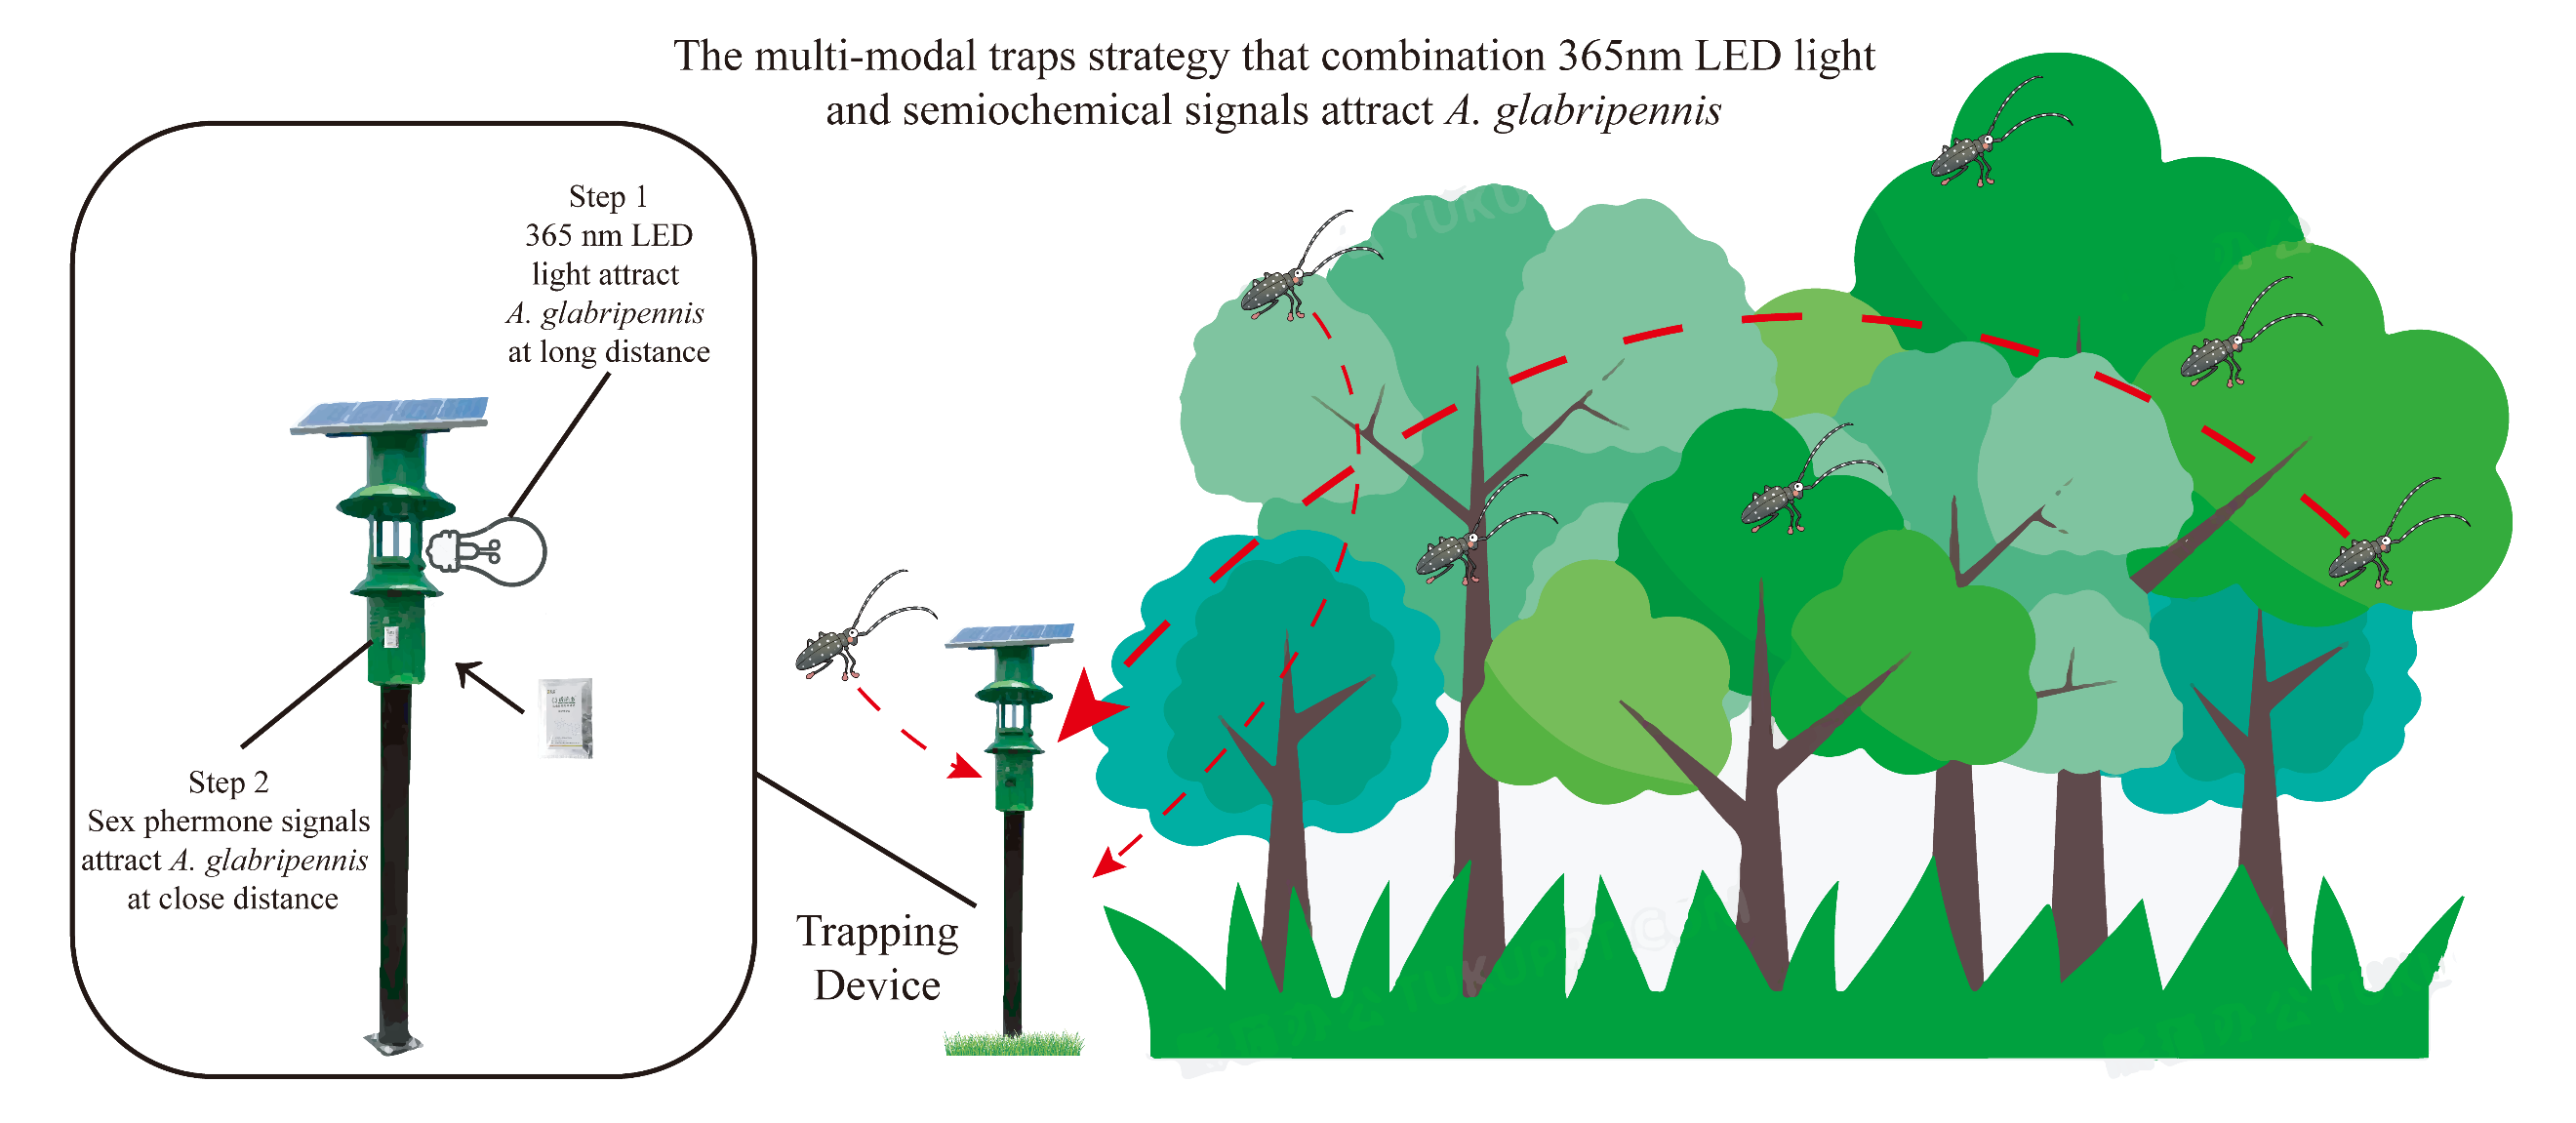


Fig. S1. Planar diagram (A) and stereoscopic diagram (B) of the chambers used for the six-way choice behavioral bioassays. Test insect release point (a). The entrance of the insect (b). In the six-choice chamber, one storage chamber was used, while the remaining storage chambers were omitted to enhance clarity in the stereoscopic diagram. LED: light emitting diode.
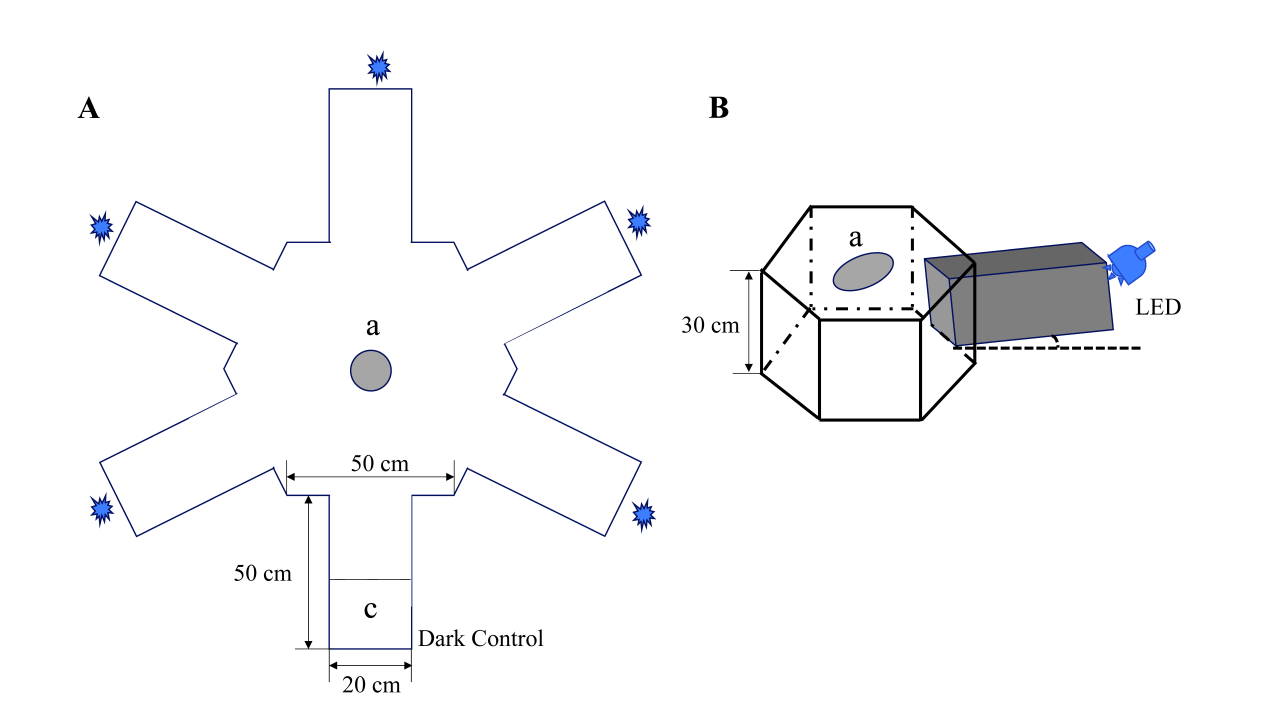


Fig. S2. Attraction rates of female and male *A. glabripennis* to (*Z*)-3-hexen-1-ol (A), 3-carene (B) and *α*-pinene (C) at different concentrations (20 μL of either 0.1, 1, 10, or 100 μg/μL on a filter paper strip) in a Y-tube olfactometer under either white or 365 nm LED (UV) light. 50 males and 50 females were tested with each combination of (*Z*)-3-hexen-1-ol concentration and light regime. 30 males and 30 females were tested with each combination of 3-carene and *α*-pinene concentration and light regime. According to Chi-squared tests, there was no significant difference in the attraction rates of adults between the two host kairomones (A: n=50, B, C: n=30).


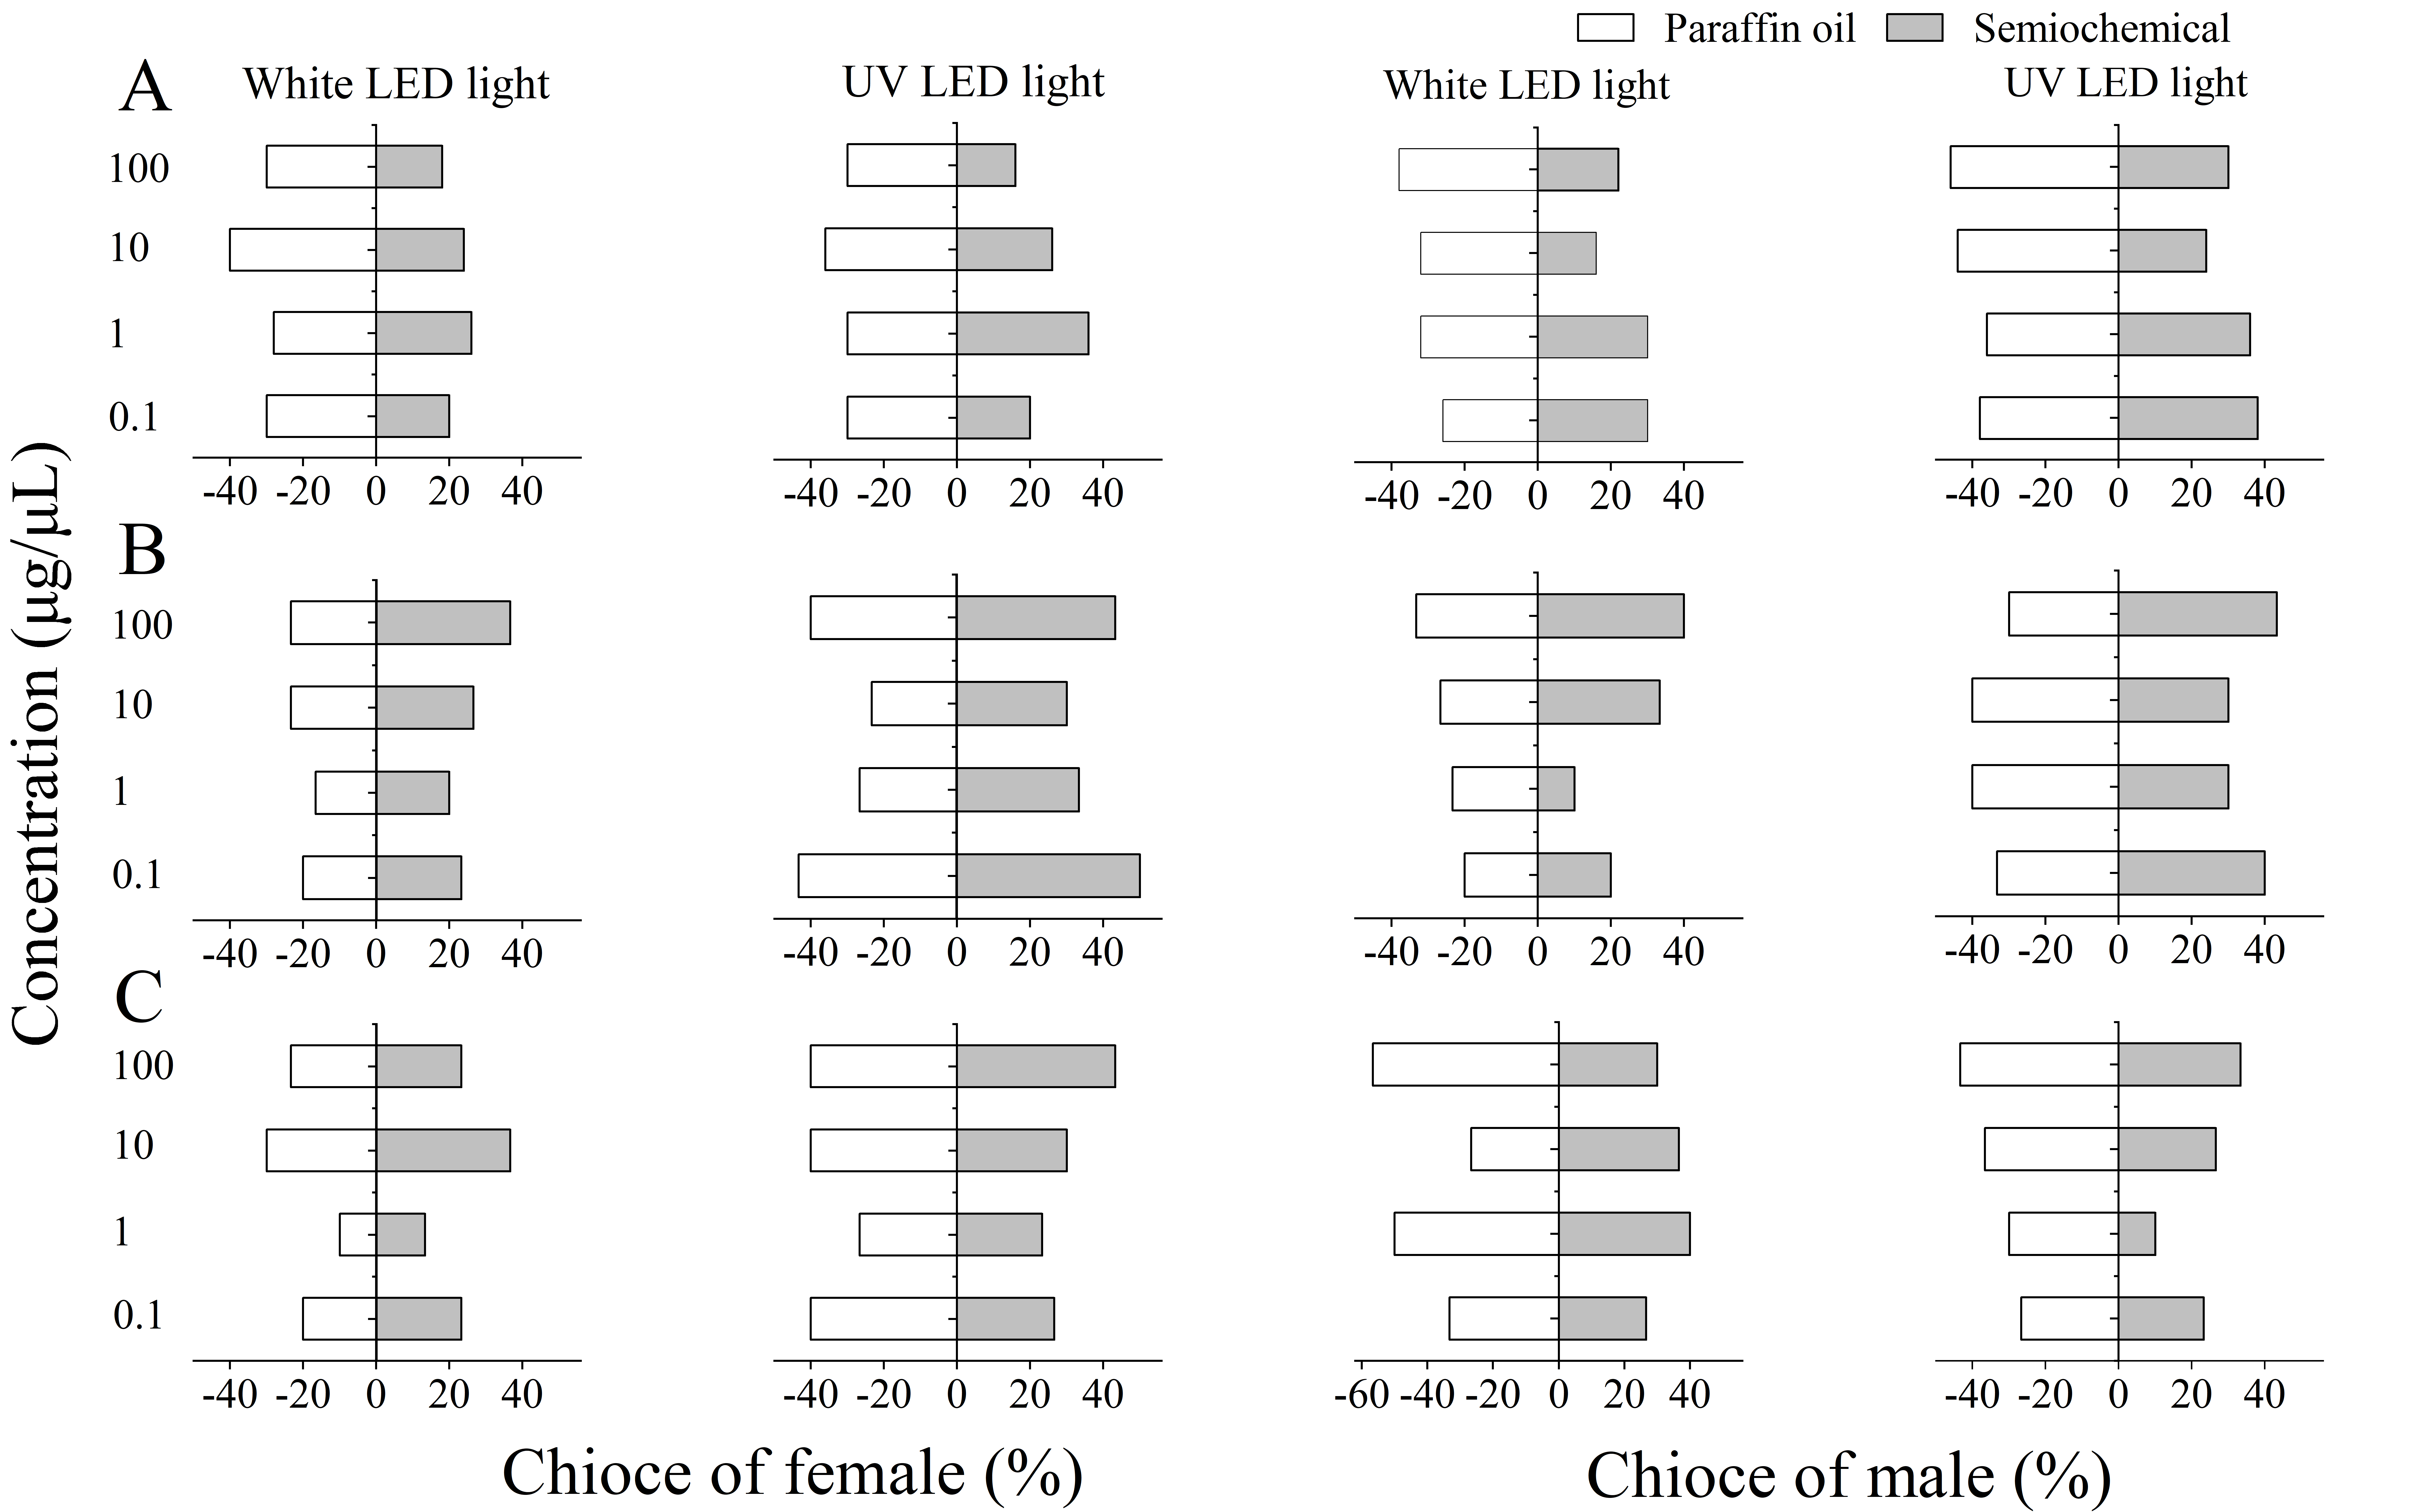


Fig. S3. The trapping efficacies of semiochemical lures for 43 species from Cerambycinae and Lamiinae. PV: blends of linalool, linalool oxide, *cis*-3-hexen-1-ol, camphene, *β*-caryophyllene, and *3*-carene; MPP: 4-(n-heptyloxy)butanal and 4-(n-heptyloxy)butanol; HK: *cis*-3-hexen-1-ol, camphene, linalool, *delta*-3-carene, and *trans*-caryophyllene; FPP indicates female-produced pheromones comprising a blend of heptanal, nonanal, and hexadecanal. (Nehme et al., 2010; Hanks and Millar, 2012; Ray et al., 2012; Wickham et al., 2012; 2014; 2016; Silva et al., 2016; Zhu et al., 2017; Xu et al., 2020).


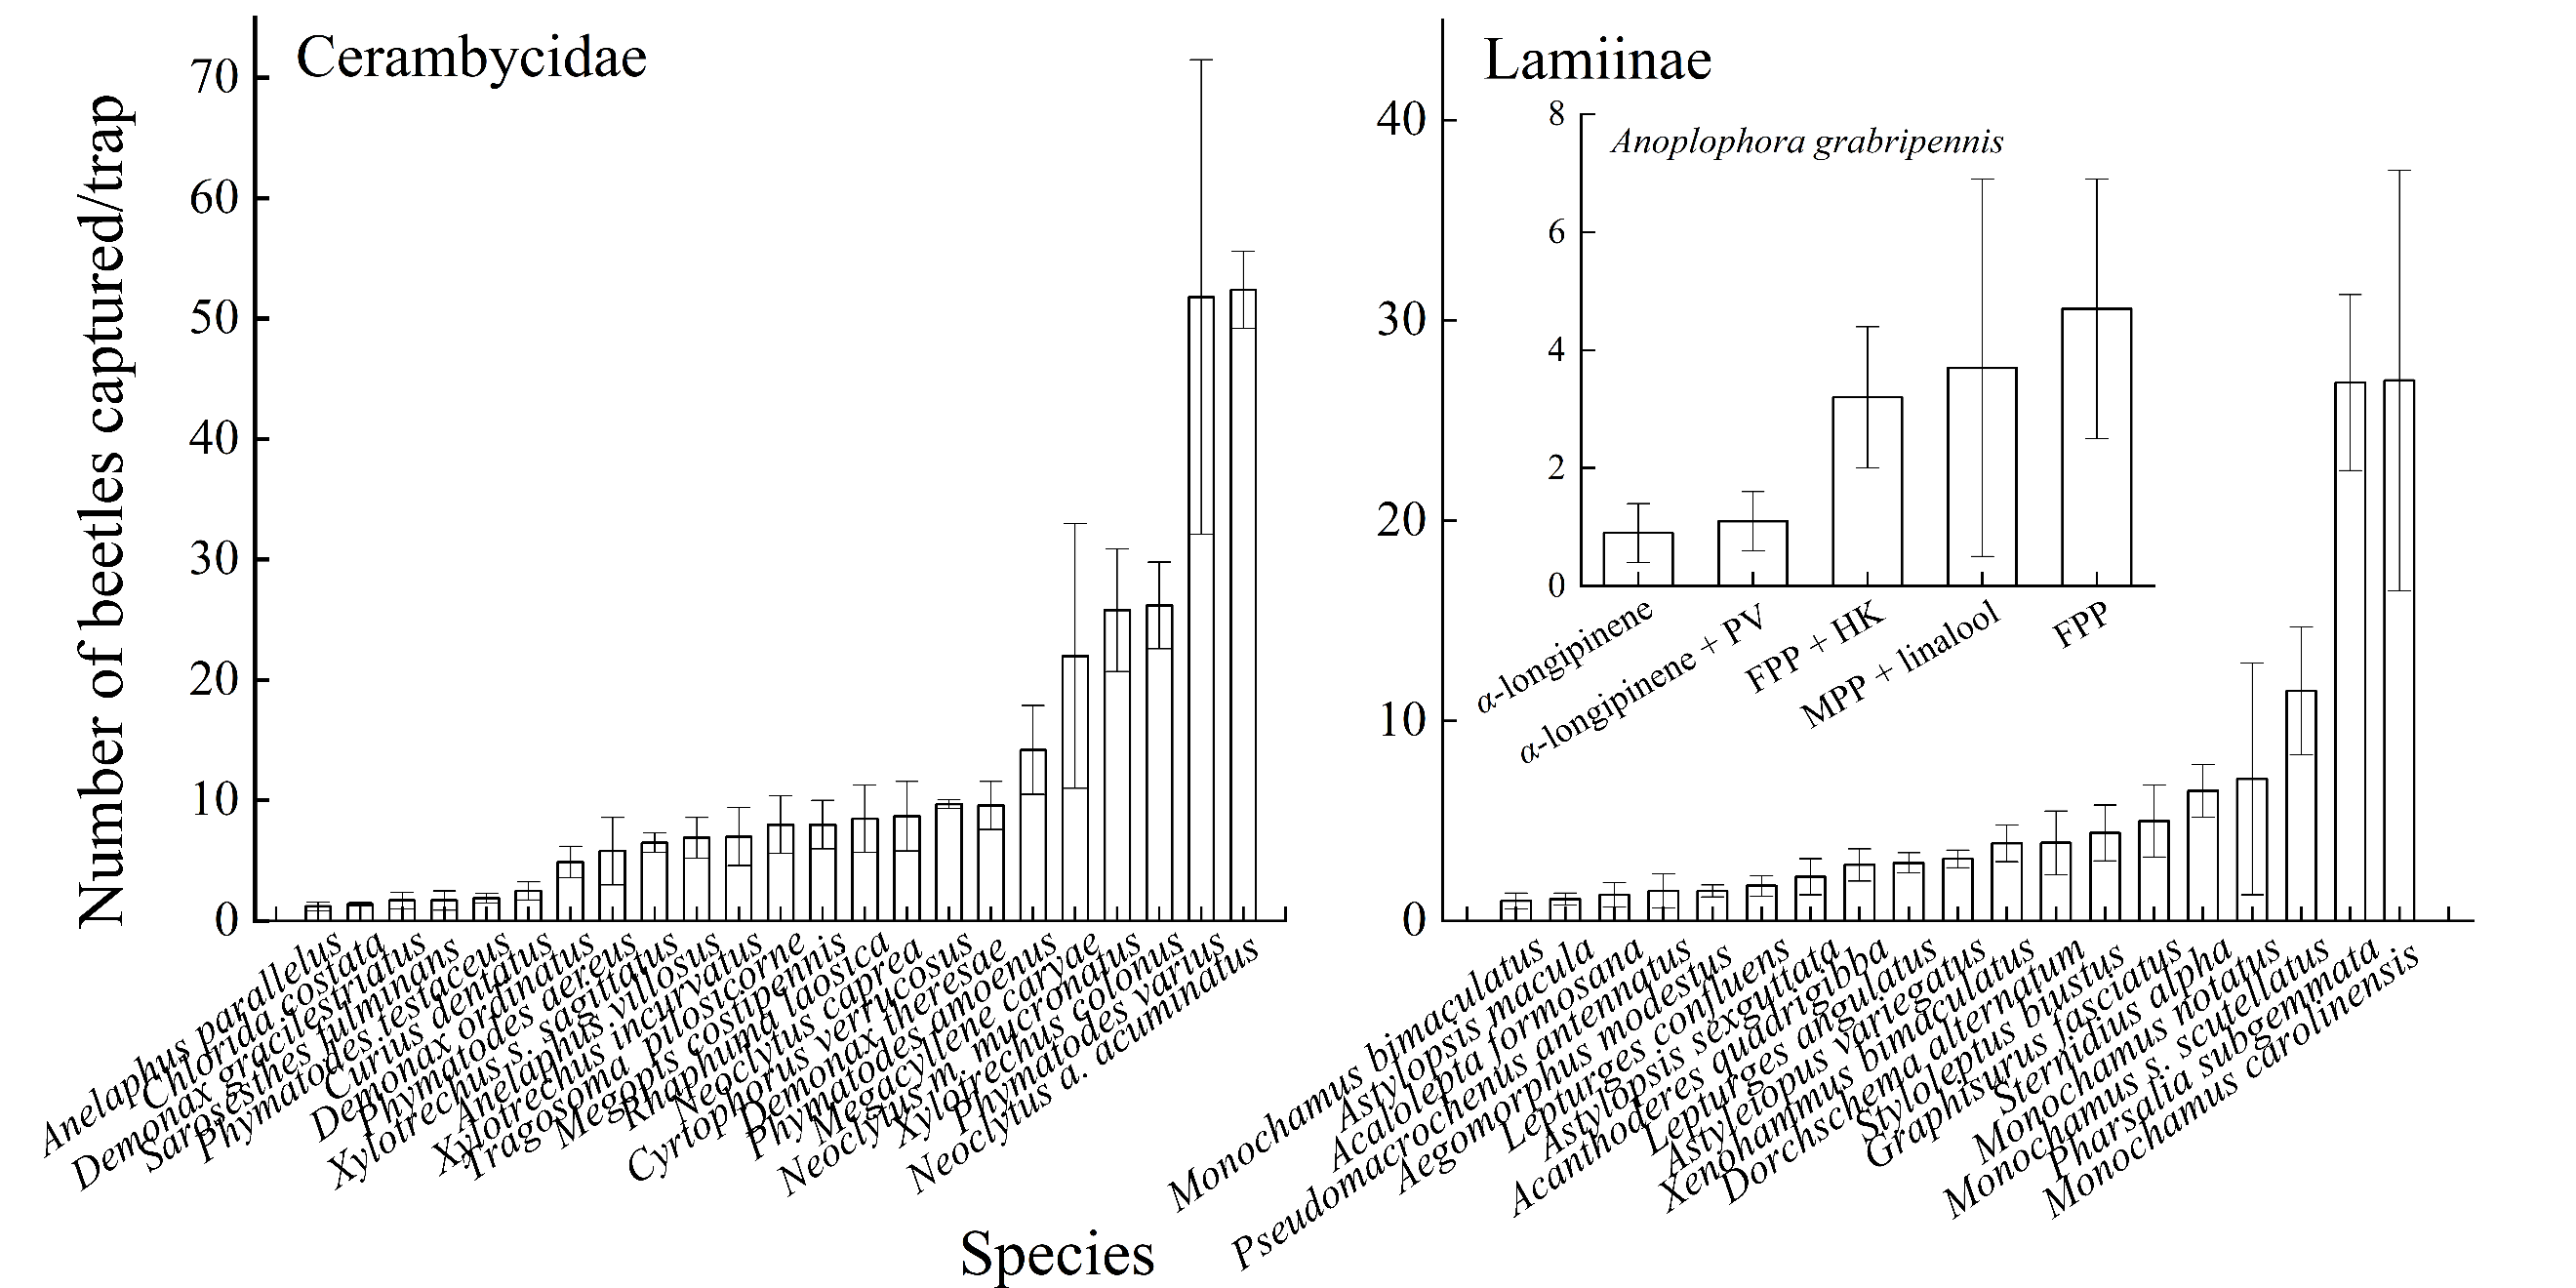


1.  Correspondence:Fei Lyu College of Forestry, Hebei Agricultural University, Baoding, Hebei Province 071000, P. R. China; Email: [haimolv@foxmail.com](mailto:haimolv@foxmail.com) (FL);Tel: +86 0312 7520216.

   †: Z Yang and H Wang contributed equally to this work. [↑](#footnote-ref-2)
