# Supplementary material
Source: Research Square preprint supplement (doi:10.21203/rs.3.rs-9256128/v1)
Supplement: Supplementary file 2 [file 8d29226092559ebe122b224f.docx]

Synergistic integration of LED illumination and sex pheromones: Advancing the trapping efficacy for *Anoplophora glabripennis*

Short title: Developing a multimodal trapping strategy for ALB

Zepeng Yang†, Huangling Wang†, Mengyao Wang, Juyun Yao, Xiaoxia Hai, Fei Lyu[[1]](#footnote-1)*

College of Forestry, Hebei Agricultural University, Baoding, Hebei, China

**Supplementary files**

Fig. S1. Planar diagram (A) and stereoscopic diagram (B) of the chambers used for the six-way choice behavioral bioassays. Test insect release point (a). The entrance of the insect (b). In the six-choice chamber, one storage chamber was used, while the remaining storage chambers were omitted to enhance clarity in the stereoscopic diagram. LED: light emitting diode.


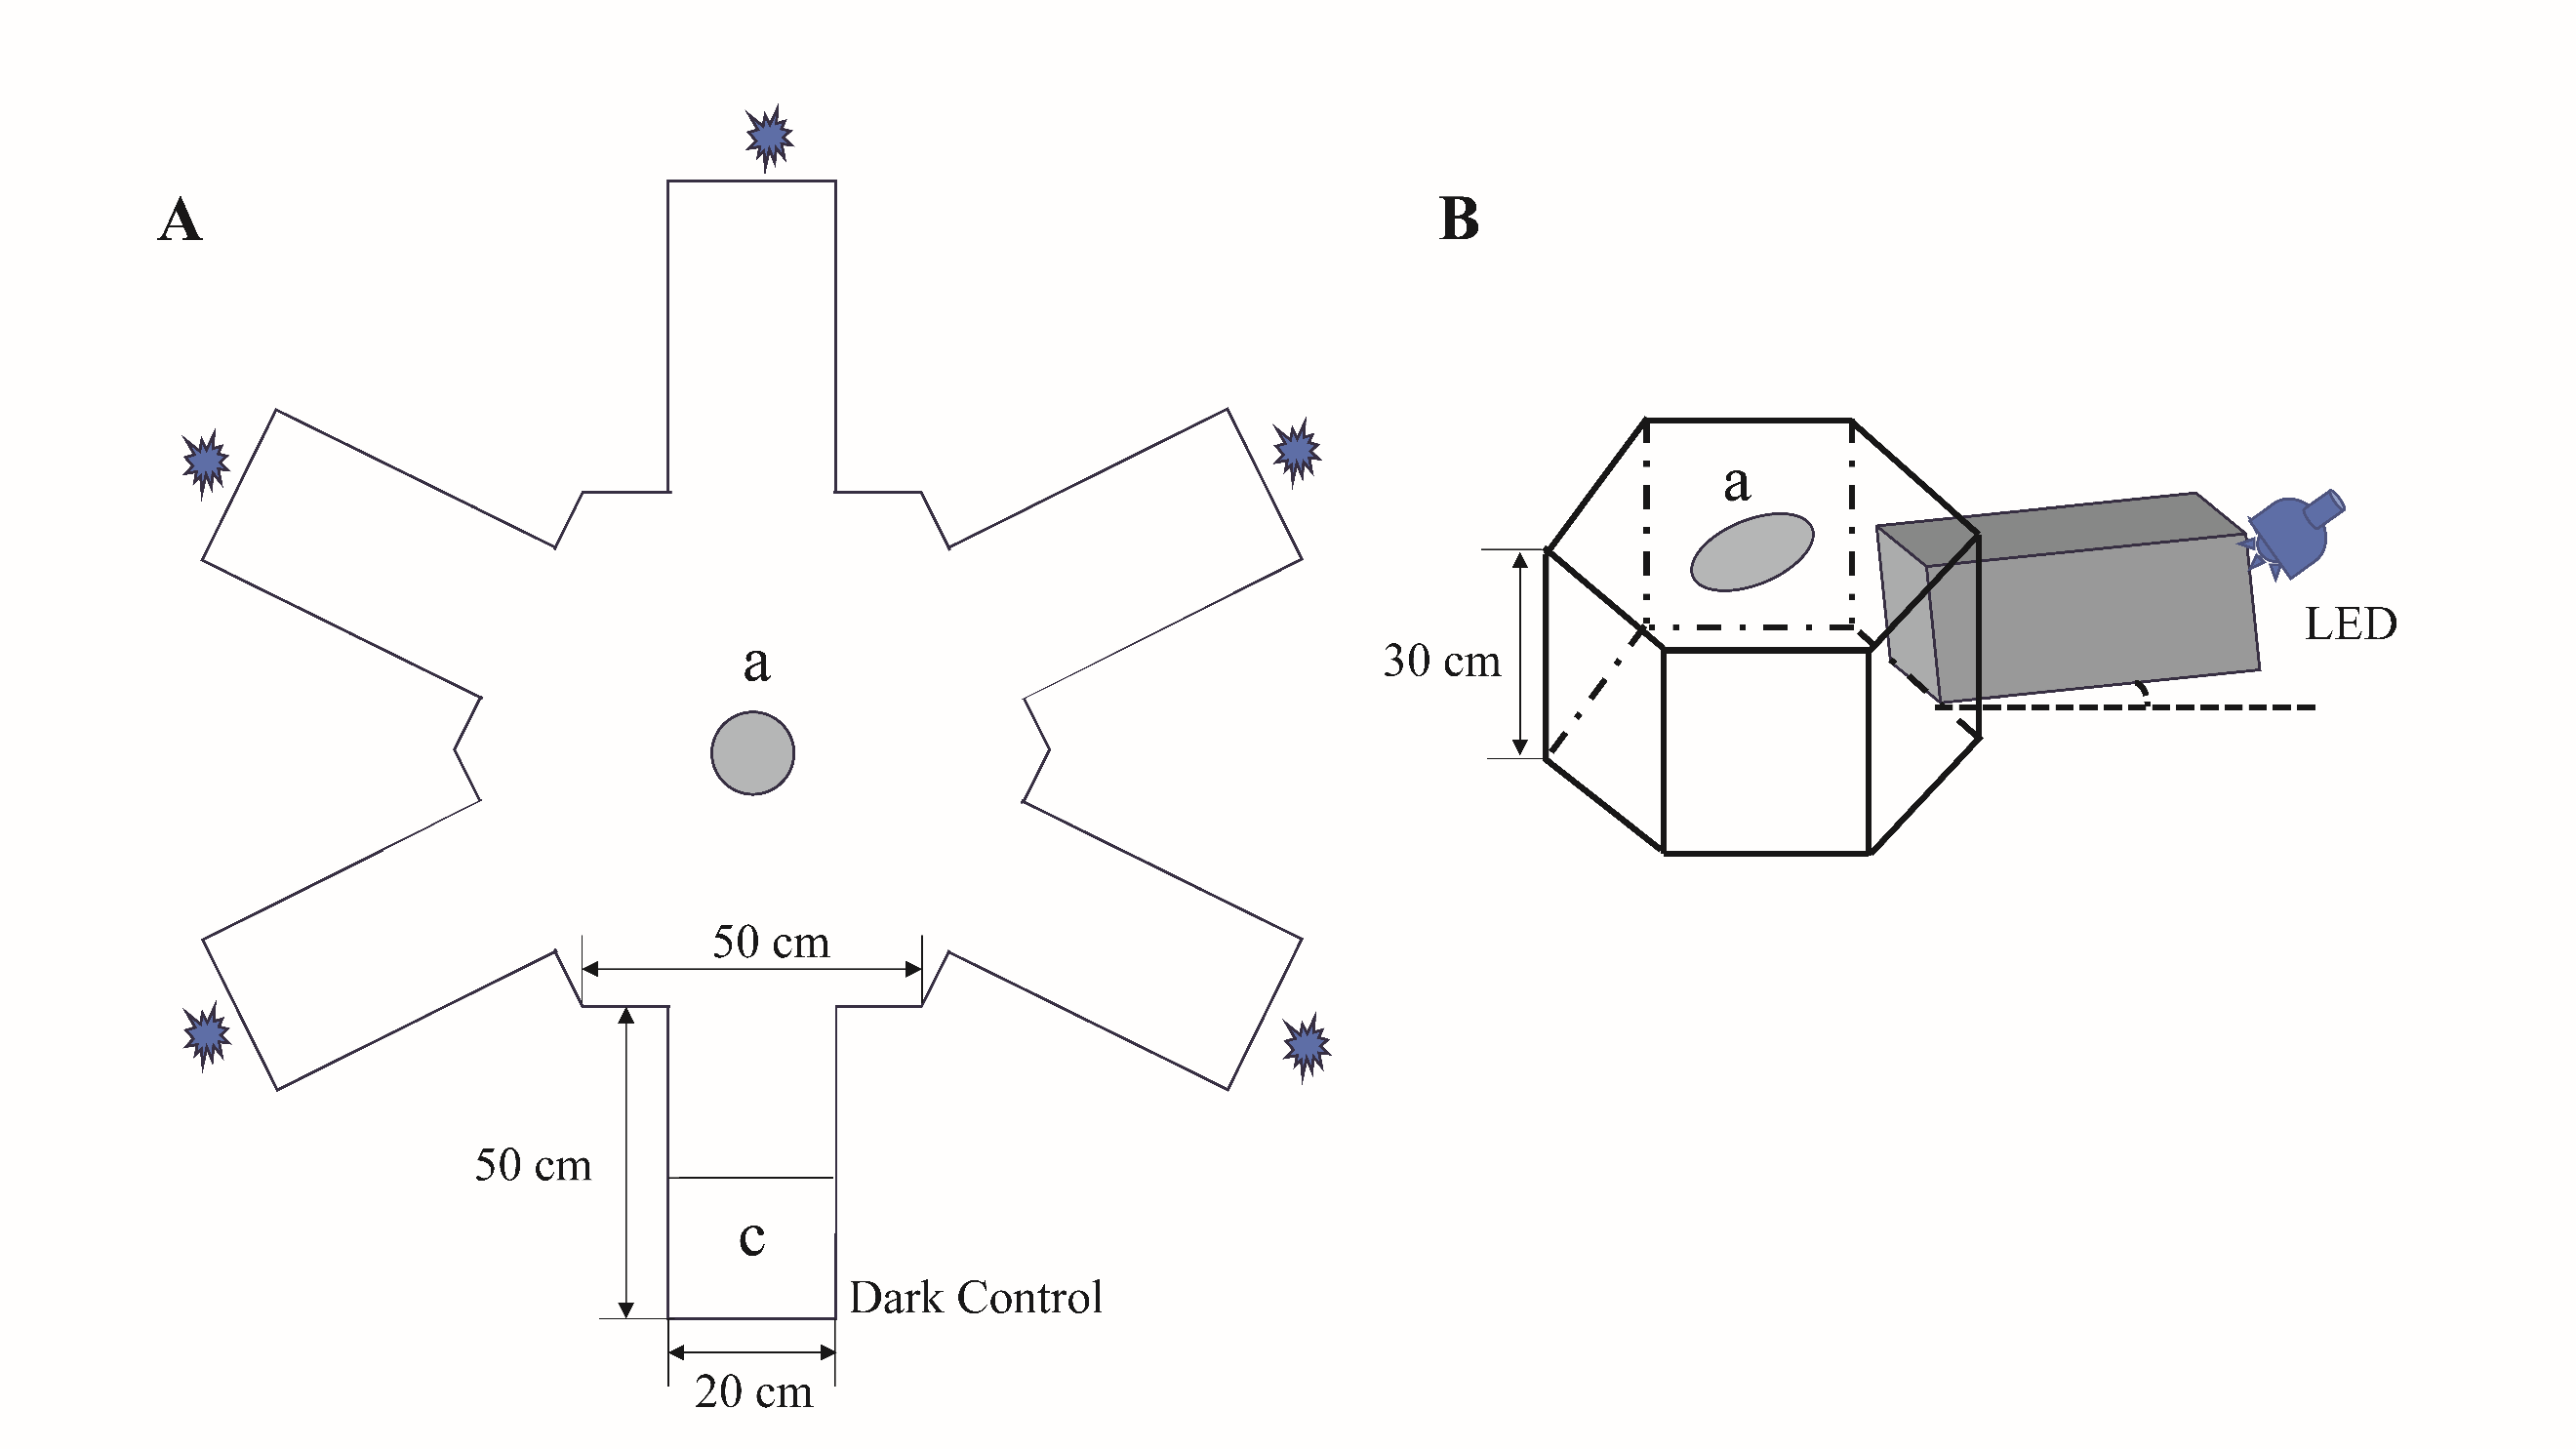


Fig. S2. Attraction rates of female and male *A. glabripennis* to (*Z*)-3-hexen-1-ol (A), 3-carene (B) and *α*-pinene (C) at different concentrations (20 μL of either 0.1, 1, 10, or 100 μg/μL on a filter paper strip) in a Y-tube olfactometer under either white or 365 nm LED light. 50 males and 50 females were tested with each combination of (*Z*)-3-hexen-1-ol concentration and light regime. 30 males and 30 females were tested with each combination of 3-carene and *α*-pinene concentration and light regime. According to Chi-squared tests, there was no significant difference in the attraction rates of adults between the two host kairomones (A: n=50, B, C: n=30).


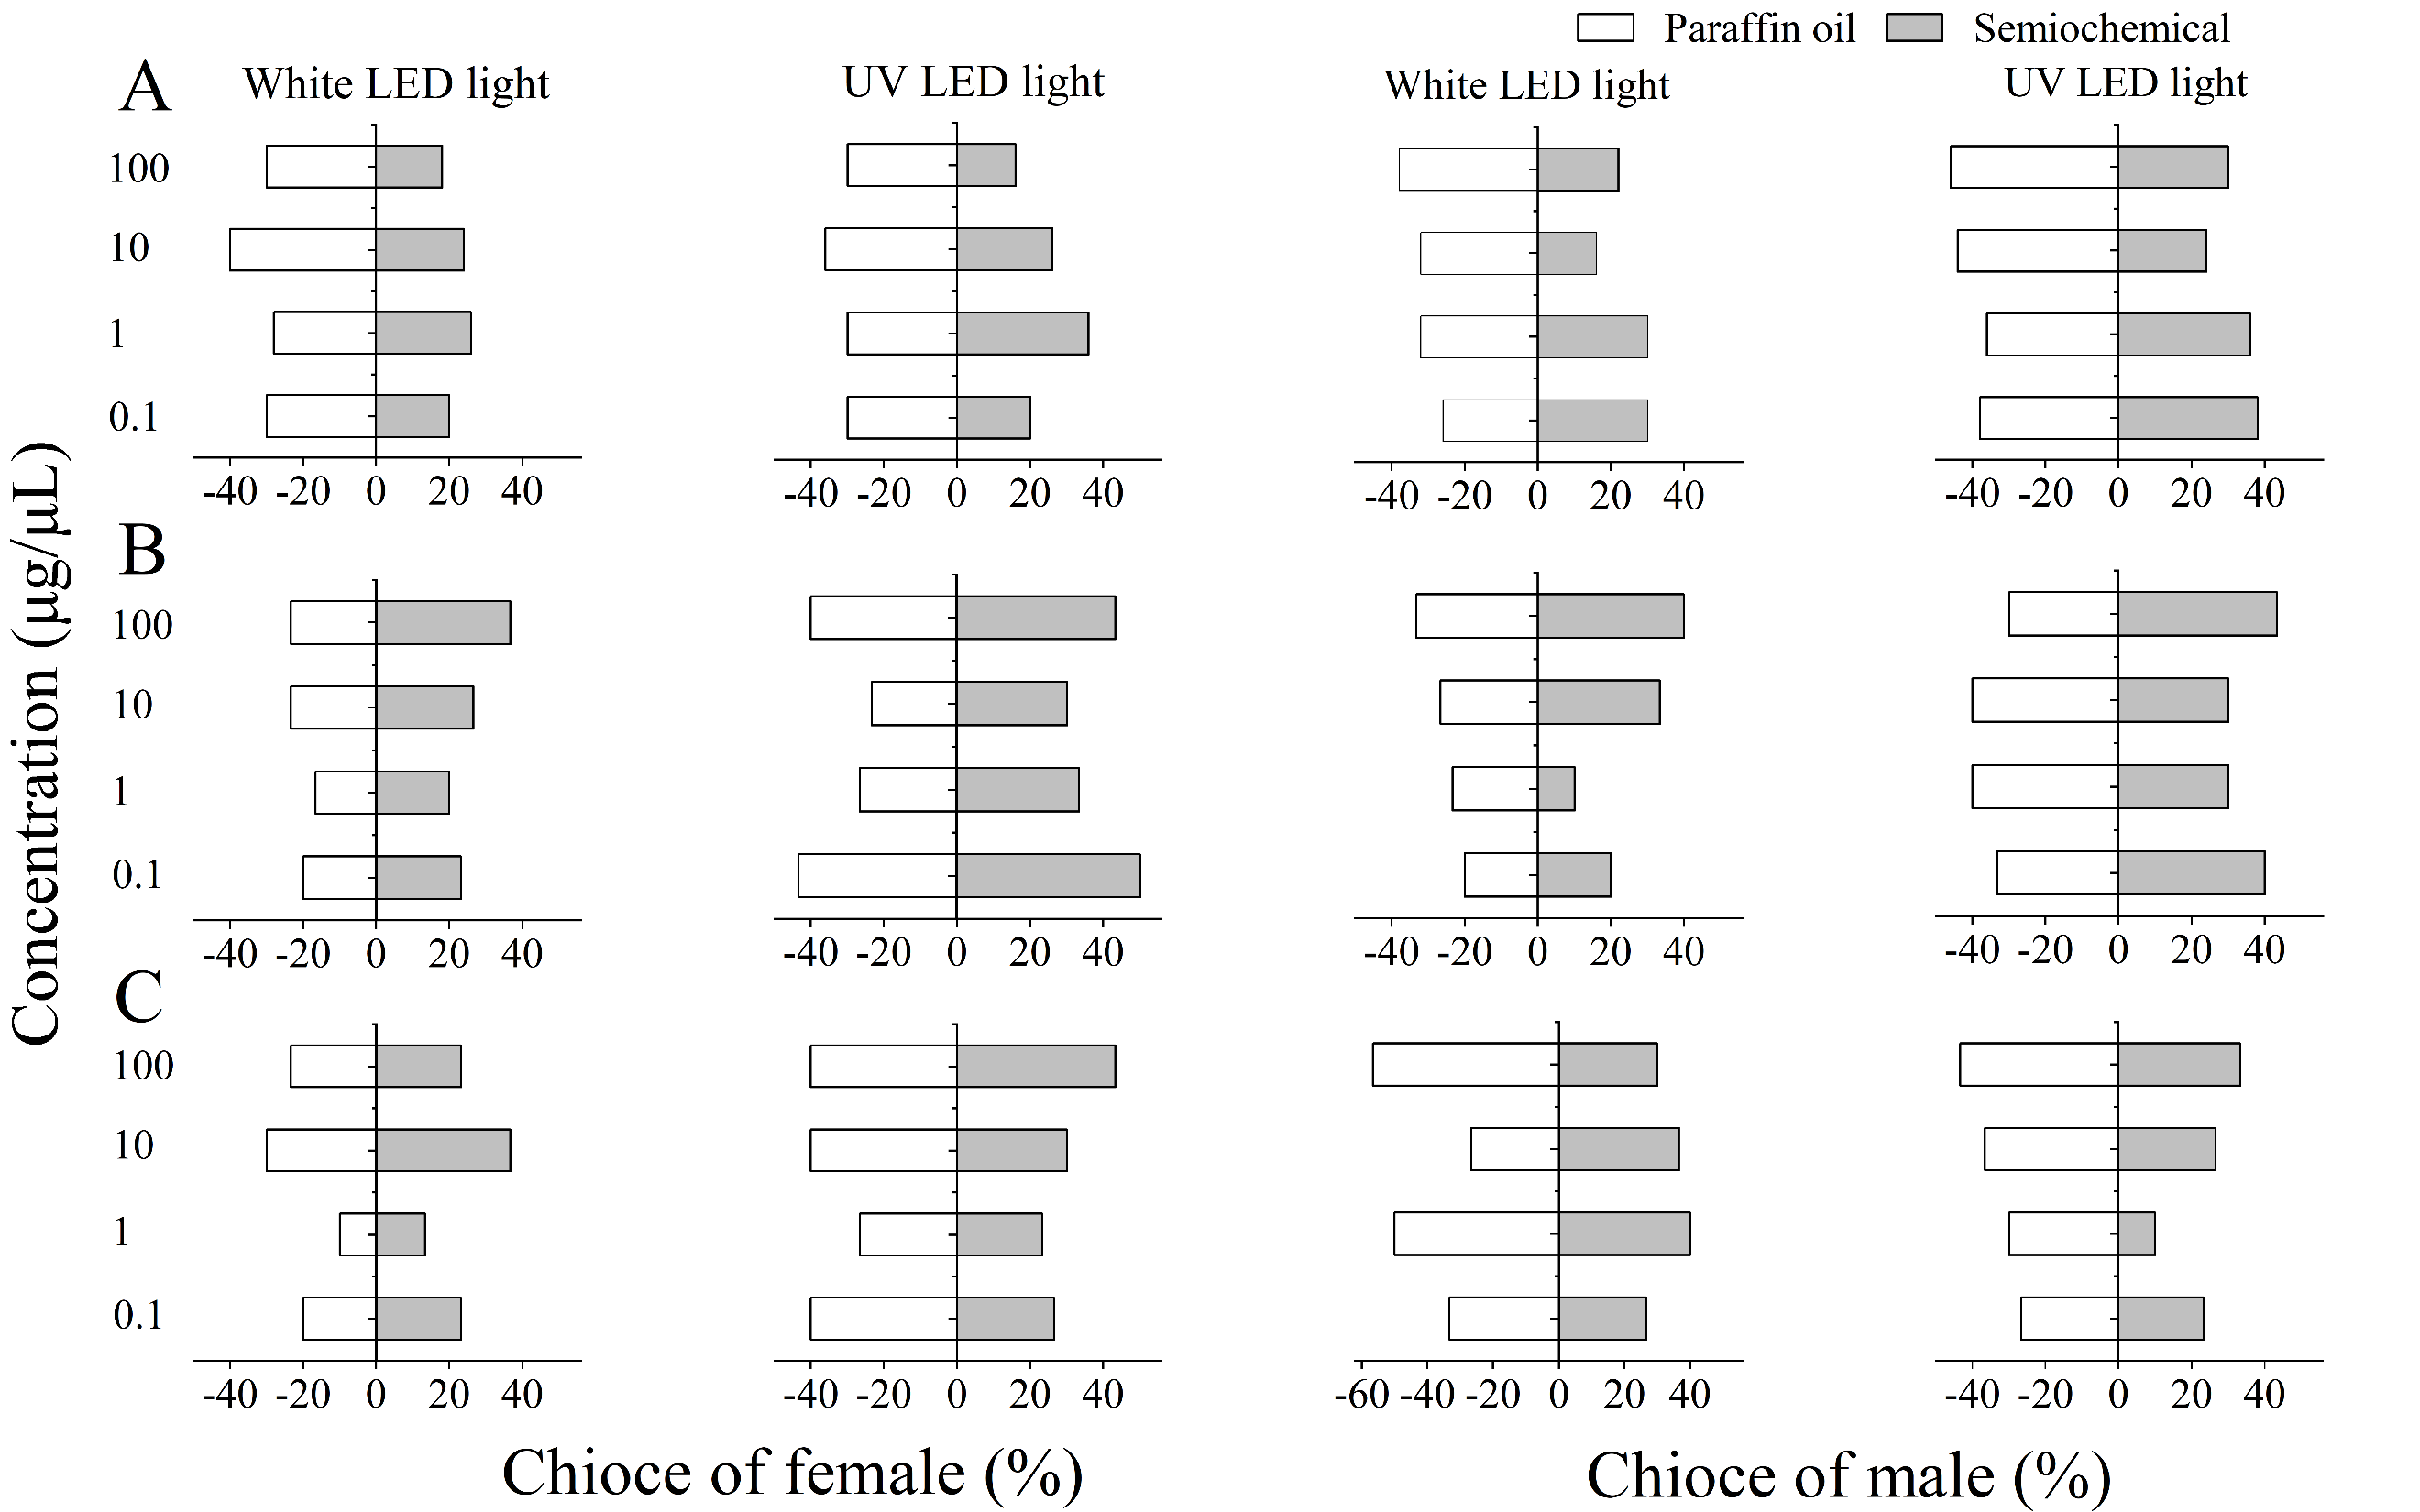


Fig. S3. The trapping efficacies of semiochemical lures for 43 species from Cerambycinae and Lamiinae. PV: blends of linalool, linalool oxide, *cis*-3-hexen-1-ol, camphene, *β*-caryophyllene, and *3*-carene; MPP: 4-(n-heptyloxy)butanal and 4-(n-heptyloxy)butanol; HK: *cis*-3-hexen-1-ol, camphene, linalool, *delta*-3-carene, and *trans*-caryophyllene; FPP indicates female-produced pheromones comprising a blend of heptanal, nonanal, and hexadecanal. (Nehme et al., 2010; Hanks and Millar, 2012; Ray et al., 2012; Wickham et al., 2012; 2014; 2016; Silva et al., 2016; Zhu et al., 2017; Xu et al., 2020).


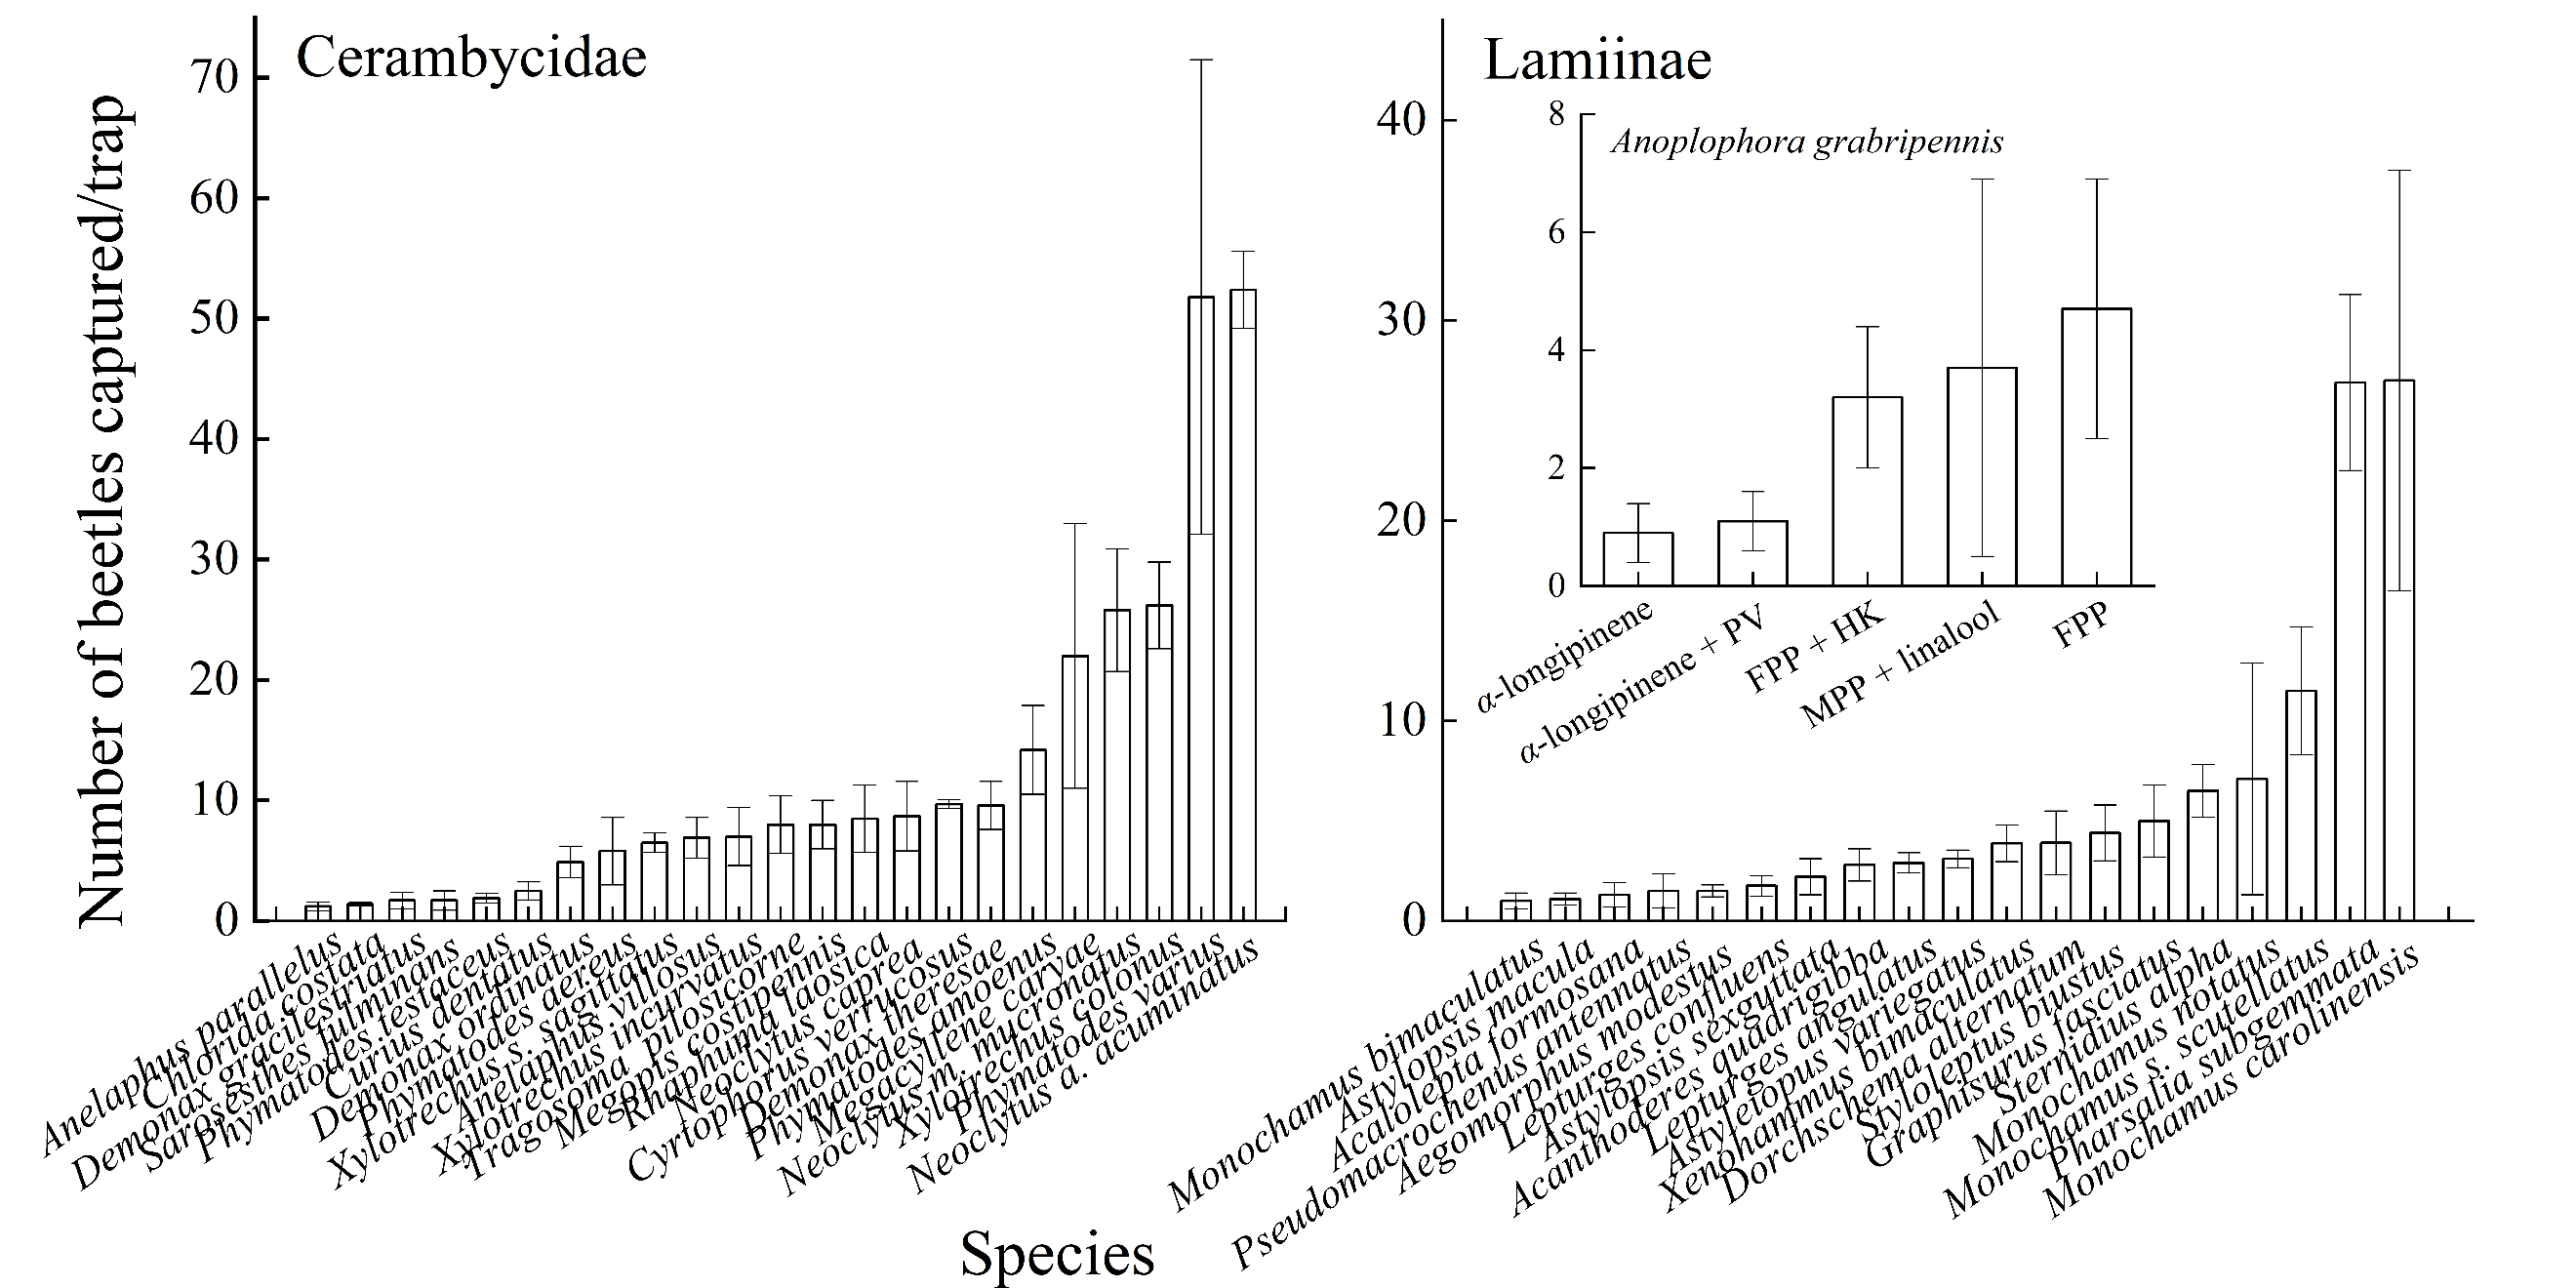


1. * Correspondence:Fei Lyu College of Forestry, Hebei Agricultural University, Baoding, Hebei Province 071000, P. R. China; Email: [haimolv@foxmail.com](mailto:haimolv@foxmail.com) (FL);Tel: +86 0312 7520216.

   †: Z Yang and H Wang contributed equally to this work. [↑](#footnote-ref-1)
