# Supplementary material
Source: Research Square preprint supplement (doi:10.21203/rs.3.rs-9256128/v1)
Supplement: Supplementary file 3 [file cc16cfef08611f033b886e17.docx]

Dear Editor,

Thank you for your constructive feedback and for the opportunity to resubmit our manuscript, "Multimodal trapping strategies with LED lights and sex pheromones for *Anoplophora glabripennis*: from laboratory, semi-field to field experiments" (Manuscript ID: JPS-2025-1271). We have renamed the manuscript to "Synergistic integration of LED illumination and sex pheromones: Advancing the trapping efficacy for *Anoplophora glabripennis*" to better reflect the bimodal sensory synergy and the practical management implications demonstrated in our multi-scale study.

We were encouraged by your assessment that our study on improving monitoring tools for *A. glabripennis* is highly relevant to the *Journal of Pest Science*. Following your initial screening, we have extensively revised the manuscript to address the "serious issues" raised.

We have addressed all of the reviewers’ comments point-by-point in the revised manuscript. In a separate document, we present our response to each of the comments and outline how we have addressed the reviewers’ comments. In the resubmission, in addition to a clean copy, we uploaded a revised version with changes highlighted. We believe that the reviewers’ comments have helped us to achieve a significant improvement of the manuscript, and we hope that this revised version is appropriate for evaluation.

We declare that none of the materials of this manuscript is published or under consideration elsewhere. All authors have agreed to this submission.

Thank you and we look forward to hearing from you soon.

Sincerely yours,

Dr. Fei Lyu

College of Forestry

Hebei Agricultural University

Baoding, Hebei, China

**JPS 2025-1271 Yang et al.** Multimodal trapping strategies with LED lights and sex pheromones for *Anoplophora glabripennis*: from laboratory, semi-field to field experiments.

This study investigated the effects of plant volatiles, male- and female-produced pheromones, and a range of monochromatic wavelengths of light emitted by LEDs, on behavioral responses of male and female *Anoplophora glabripennis.* The authors used a 6-choice arena to test adult attraction to various wavelengths of light and showed that more adults of both sexes were more attracted to wavelengths in the range of 365–420 nm than higher frequencies than would be expected by chance. They then conducted numerous y-tube 2-choice olfactometer bioassays testing response of individual males and females to various semiochemicals (each tested at a range of concentrations) under equal intensities of white light *vs.* a 365 nm LED light, and found that attraction of females and males to lower concentrations of certain volatiles were greater under the 365 nm light regime, i.e.:

- Females, but not males, responded positively to linalool at 1.0 μg/μL concentration under either white light or 365 nm LED light, but responded positively to the 0.1 μg/μL concentration of linalool only under the 365 nm light.
- Females also responded positively to a synthetic blend of male pheromones at 10 μg/μL under either white or 365 nm light but responded positively to the lower concentrations of 1.0 and 0.1 μg/μL only under the 365 nm light.
- Males responded positively to the blend of female pheromones (heptanal, nonanal, hexadecanal) at the concentration of 100 μg/μL under white light but not under the 365 nm light, Conversely, males responded positively to a lower concentration (10 μg/μL) of the same pheromone blend under the 365 nm LED but not under white light.

They also conducted a trapping study in a cage inside a greenhouse, releasing groups of 20 males or 20 females on one side of the cage with an intercept trap about 4 m away on the other side of the cage, and recorded the numbers of beetles that were captured in the trap or had moved within 100 cm of the trap at time intervals of 30, 60, 90, 120, 150, and 180 minutes after release. They found that more females were captured in (and attracted to within 100 cm of) a trap baited with 365 nm LED lights than in traps baited with synthetic blends of either male or female-produced pheromones, and that the mean number captured was reduced when female pheromones were added to traps baited with 365 nm LEDs. Results differed for males; Traps baited with 365 nm LEDS attracted more males within a 100 cm radius than did traps without the LED lights baited with either the male or female pheromones, but the mean number of males captured and attracted to within 100 cm of the trap was greatest when traps were baited with both the 365 nm LEDs and the female pheromones.

Finally, they ran a trapping experiment in two sites comparing mean catch of males, females and total *A. glabripennis* among traps baited with either: 1) female pheromones; 2) 365 nm LEDs, or 3) female pheromones plus 365 nm LEDs. They found: 1) traps baited with pheromones alone captured fewer females and fewer total beetles than traps baited with LEDs alone or LEDs plus pheromones; and 2) traps baited with both female pheromones and 365 nm LEDs captured more males than traps baited with either LEDs or pheromones alone, but at only one of two sites. The number of beetles captured was low overall.

The topic of the manuscript is certainly relevant to the Journal of Pest Science, as improvements in tools for monitoring and detecting *Anoplophora glabripennis* would be a significant contribution to the management of this species where it is invasive. However, there are several serious issues with the manuscript that must be addressed before sending it out for further peer review.

**1.The English grammar needs correcting in several places**. I have suggested edits to the wording in the first few pages of the manuscript, but the manuscript should be checked and corrected for proper English grammar throughout before being sent out for formal peer review.

Response: Thank you for your review and for the helpful edits. We have taken your advice seriously and performed a comprehensive linguistic and structural overhaul of the entire document. Rather than simple grammatical corrections, we have systematically rewritten all sections to ensure greater clarity. All technical terms and complex sentences have been carefully refined to avoid ambiguity. We hope the revised version now meets the high standards required for formal peer review.

**2.Some conclusions are not supported by the results or are overstated,** e.g., the statements on lines 11–12 “Combination 365-nm LED lights and female-produced pheromones caught more adults than single cues” and lines 32–35 “Semi-field and field experiments showed that caught number of combination 365-nm LED lights and mixture of heptanal, nonanal and hexadecanal for both female and male was significantly higher than single cues, especially semiochemical cues” are not supported by the data. An accurate statement, based on Figs. 7 & 8, would be “Traps baited with 365-nm LED lights captured more ALBadults than traps baited with synthetic female-produced pheromones. Traps baited with both 365 nm LEDs and female-produced pheromone captured more males than did traps baited with either stimulus alone, but in only one of two field sites.”

Response: Thank you for pointing out the overstatements regarding conclusions. We agree that the efficacy of the combined stimuli was more pronounced in male attraction and showed some site-specific variation. Accordingly, we have completely rewritten the key message (Lines 12-22, Pages 1-2) and Abstract (Lines 28-67, Pages 4-5) to strictly follow your suggestions regarding the accuracy of our conclusions. Specifically, we have moved away from generalized statements about synergy and instead detailed the specific conditions where the multimodal approach was most effective (e.g., male attraction and site-specific variations), as you correctly pointed out.

**3.In another example: Lines 281–286**, “Furthermore, both females and males also showed a preference for 420 nm, 385 nm and 400 nm LED lights (Fig. 2 C, D, E and F).” This statement is not strictly accurate because the chi square results simply indicate that first choice by the beetles was not independent of wavelength, i.e., response was not the same to each wavelength (P < 0.05). If you want to statistically determine whether the beetles responded significantly more to a one wavelength *versus* another you would have to run subdivided chi square analyses. I suggest instead “When comparing the relative attraction of different spectra to female and male *A. glabripennis* in the six-way choice bioassays, the first choice of both sexes differed significantly among the LED treatments (χ2 ≥11.8, P ≤0.05). Both sexes were more frequently observed orienting towards the sectors that contained LEDs in the range of 365–420 nm than to those with 435–660 nm LEDs or the dark control (Fig. 2 A–H).”

Response: Thank you for your rigorous and professional correction regarding the interpretation of the Chi-square results. We agree that the Chi-square test indicates the non-independence of response and wavelength, rather than a direct pairwise preference. Following your excellent suggestion, we have revised the text to more accurately describe the behavioral responses as suggested (Lines 446-455, page 24 in the marked-up version).

**4.The Methods have not been described in sufficient detail** **to understand exactly how bioassays were conducted, whether individual beetles were used more than once, and whether or not there was pseudoreplication.** For example, on lines 202–203, the authors state that in the y-tube olfactometer bioassays: “Females and males were tested separately. Thirty-fifty biological replicates were measured for each group.” I interpret this to mean 30 (or 50) different males and 30 (or 50) different females were tested in each 2-choice comparison between the paraffin control and a semiochemical concentration, and if so, then within each comparison there were 30 or 50 independent replicates and the chi square test results are valid. However, it is not clear whether an individual beetle used in one comparison was subsequently used in another two-choice comparison. Judging by the very large number of 2-choice tests conducted, it is likely that individual beetles may have been used more than once, otherwise more than 3500 different beetles would have been needed just to complete the bioassays shown in Fig. 3. If beetles were used in more than one 2-choice comparison, then the replicates among the different 2-choice bioassays are not independent of each other, and that may have affected the results. For example, prior exposure to a high concentration of a semiochemical could affect its response to a lower concentration of the same compound in a subsequent bioassay. Or if the same beetle was tested for its response to a particular semiochemical and light regime one day and then tested for response to a different semiochemical/light regime one or several days later, its response may have been affected by age. The authors need to state exactly how many different beetles in total they tested and if beetles were used in more than one bioassay. If beetles were used more than once, then they need to explain how they reduced possible effects of prior experience or beetle age on behavioral responses.

I had similar concerns in the semi-field greenhouse cage trapping study, where the authors state they released 20 males or 20 females on one side of the cage and had “Five biological replicates … measured for each treatment”. It’s not clear whether “biological replicate” means that a different group of 20 males or 20 females was used for each replicate (in which case, a total of 100 different males and 100 different females would have been released) or whether the same set of 20 males and 20 females were tested with each of the 5 different trapping treatments? If the latter, then the replicates are not independent and the design was a sort of repeated measures experiment, testing the attraction of different treatments to the same set of beetles. If so, the repeated measures aspect would have to be incorporated into the GLM to account for this. If some beetles were re-used and not others, i.e., a mix of some new beetles and some re-used beetles in the five replicates, then your replicates are neither truly independent nor a kind of a repeated measures. The authors must please clarify whether any beetles were re-used and if so, how they justify or account for this in the analysis.

Response: Thank you for raising this important point regarding the independence of our biological replicates. We fully agree that reusing beetles in different bioassays could lead to pseudoreplication and bias the results due to prior exposure or age effects. We would like to clarify that each adult beetle was used only once in all bioassays including Y-tube, six-way choice, and cage trapping experiments. To ensure a sufficient supply, we conducted extensive field collections across multiple sites from 2023 to 2025. As shown in Table 1, a total of 4,411 males and 4,807 females were captured and maintained during the study period. This large population allowed us to use a unique group of beetles for every treatment and replicate. We have now explicitly stated this in the revised manuscript (Lines 214-215, Page 12).

**Table 1. The numbers of captured males and females in 2023-2025.**

| **Year** | **2023** | | | **2024** | | | | **2025** | | | |
| --- | --- | --- | --- | --- | --- | --- | --- | --- | --- | --- | --- |
| **Date** | **Sites** | **Number of captured** | | **Date** | **Sites** | **Number of captured** | | **Date** | **Sites** | **Number of captured** | |
|  |  | **Male** | **Female** |  |  | **Male** | **Female** |  |  | **Male** | **Female** |
| 6.21 | Mancheng | 120 | 110 | 6.16 | Dingzhou | 63 | 81 | 6.11 | Baigou | 37 | 49 |
| 6.24 | Dingzhou | 50 | 60 | 6.21 | Gaocheng+Dingzhou | 49 | 43 | 6.12 | Mancheng | 20 | 22 |
| 6.27 | Gaocheng | 30 | 30 | 6.28 | Mancheng | 19 | 27 | 6.21 | Dingzhou | 52 | 65 |
| 6.30 | Qingyuan | 110 | 120 | 7.1 | Gaocheng+Dingzhou | 77 | 86 | 7.3 | Gaobeidian | 27 | 29 |
| 7.6 | Gaocheng+Dingzhou | 190 | 160 | 7.6 | Mancheng | 22 | 19 | 7.6 | Cangzhou | 108 | 101 |
| 7.9 | Mancheng | 106 | 110 | 7.9 | Dingzhou | 56 | 42 | 7.12 | Dingzhou | 79 | 83 |
| 7.14 | Qingyuan | 38 | 32 | 7.15 | Gaobeidian | 89 | 72 | 7.17 | Cangzhou | 99 | 62 |
| 7.15 | Gaocheng | 27 | 32 | 7.23 | Dingzhou | 82 | 85 | 7.18 | Dingzhou | 130 | 117 |
| 7.17 | Mancheng | 39 | 47 | 7.29 | Baigou | 138 | 115 | 7.23 | Cangzhou | 92 | 81 |
| 7.18 | Qingyuan | 33 | 41 | 8.3 | Baigou | 142 | 110 | 7.27 | Cangzhou | 52 | 37 |
| 7.20 | Dingzhou | 66 | 26 | 8.8 | Gaobeidian + Baigou | 127 | 136 | 8.3 | Dingzhou | 96 | 117 |
| 7.25 | Qingyuan | 45 | 29 | 8.11 | Baigou | 60 | 159 | 8.10 | Cangzhou | 49 | 50 |
| 8.3 | Gaocheng+Dingzhou | 41 | 36 | 8.15 | Baigou | 119 | 109 | 8.13 | Dingzhou | 67 | 55 |
| 8.9 | Mancheng | 55 | 69 | 8.19 | Baigou | 93 | 137 | 8.16 | Mancheng | 24 | 32 |
| 8.13 | Dingzhou | 79 | 112 | 8.24 | Baigou | 108 | 133 | 8.18 | Cangzhou | 43 | 55 |
| 8.16 | Mancheng | 44 | 56 | 8.28 | Gaobeidian + Baigou | 173 | 225 | 8.22 | Dingzhou | 37 | 52 |
| 8.17 | Dingzhou | 51 | 59 | 9.3 | Baigou | 198 | 237 | 8.27 | Baigou | 59 | 61 |
| 8.22 | Gaocheng+Dingzhou | 60 | 63 | 9.7 | Gaobeidian + Baigou | 156 | 207 | 9.4 | Dingzhou | 33 | 51 |
| 8.25 | Dingzhou | 60 | 93 | 9.12 | Baigou | 104 | 118 |  |  |  |  |
| 8.29 | Dingzhou | 46 | 70 |  |  |  |  |  |  |  |  |
| 9.1 | Mancheng | 33 | 47 |  |  |  |  |  |  |  |  |
| 9.4 | Gaocheng | 39 | 51 |  |  |  |  |  |  |  |  |
| 9.8 | Qingyuan | 27 | 39 |  |  |  |  |  |  |  |  |
| 9.12 | Dingzhou | 43 | 55 |  |  |  |  |  |  |  |  |
|  |  | **1432** | **1547** |  |  | **1875** | **2141** |  |  | **1104** | **1119** |
| **Total** | **The numbers of captured males and females were 4411 and 4807, respectively.** | | | | | | | | | | |

**5.There is insufficient detail in the description of statistical analyses**. E.g., Lines 274–275 “the differences in attraction rates and trapping catch numbers of females and males between treatments were measured using generalized linear models (GLMs), followed by the Bonferroni correction.” Did you test whether the residuals departed significantly from normality, or did you assume the residuals were normal? Trap catch count data are often not normal and are fit better with a Poisson or negative binomial distribution. What kind of post-hoc means comparison test was used? The Bonferroni correction suggests you compared means among treatments with multiple t-tests but if so, please state this explicitly. Using the Tukey-Kramer test would avoid the need to use the Bonferroni correction because it controls the experiment-wise error rate at 0.05.

Response: Thank you for your professional suggestions regarding the statistical analysis. Since trap catch data often follow a non-normal distribution, we did not assume normality for the residuals. Instead, we analyzed the differences in attraction rates and catch numbers using Generalized Linear Models (GLMs) with a Poisson distribution and a log link function, which is more appropriate for count data. Following your advice, we have also replaced the Bonferroni correction with the Tukey-Kramer test to more effectively control the experiment-wise error rate at 0.05. These changes have been updated in Section 2.7 and the corresponding figure captions (Lines 437-438, Page 22; Lines 1070-1071, Page 59; Lines 1083-1084, Page 60; Lines 1097-1102, Page 61; Lines 1111-1112, Page 62 in the revised version).

**6.Some of the results** in sections 3.1 and 3.2 (e.g. greater attraction of *A. glabripennis* to LEDs at wavelengths in the range of 365-420 nm *vs.* the dark orwavelengths 435 nm or greater) are not novel but **simply confirm those previously published by the same authors.**

Response: Thank you for your insightful comments regarding the novelty of the results in Sections 3.1 and 3.2. While the preference for the 365–420 nm range is consistent with our previous observations, the present study is not a simple confirmation but a multidimensional advancement in terms of experimental design, behavioral mechanism, and data precision:

1. Our previous work (e.g., Fig. 1 & 2) focused on the temporal dynamics of attraction, assessing how attraction rates for 14 single wavelengths changed over long exposure times (up to 30 min). In contrast, this study (Fig. 3) captures the "First Choice" response of beetles within a competitive spectral environment. By presenting 8 different sub-group combinations (Groups A–H), we evaluated the beetle’s instantaneous behavioral priority. Our results show that 365 nm acts as a primary 'anchor' wavelength, consistently outperforming other attractive signals (e.g., 420 nm) in a competitive environment. This study identifies a stable visual preference that was not addressed in our previous research, which focused more on temporal attraction rather than competitive choice.

2. Previous group-based assays (e.g., 20 beetles per group) could be influenced by inter-individual interference or social cues (follow-on behavior). In this study, we tracked a significantly larger sample of independent individuals. This transition from collective response to individual physiological tracking ensures that the observed phototaxis is a robust, innate visual response, providing a more reliable scientific basis for physical control strategies. The corresponding details have been incorporated into the revised manuscript (see Lines 267–274, Page 15; Lines 328-333, Pages 17-18).

7.The Figures could be greatly improved. I found it very difficult to interpret the current Figures; for me at least, there was very little contrast between the colors for males and females in Fig. 2 or between Controls and Treatments in Figs. 3 and 4. I’ve provided detailed comments below.

Response: Thank you for your instructive suggestions. We have revised relative figures as suggested. (Lines 1007-1014, page 52; Line 1017-1032, pages 53-54; Lines 1143-1151, page 66; Lines 1035-1051, pages 55-56 in the marked-up version)

Fig. 2 Please order the X-axes in ascending wavelength, e.g., In Fig. 2C the order of wavelengths on the x axis should be 365 385 420 455 630 dark. Please also increase the contrast in colors or shades between the bars for % choice by males and females. Red-green color blindness is fairly common in men (1 in 12). I am slightly red-green color blind and find it difficult to see the difference in color between the light green and light tan in Figs. 2, 3, 4 and 8.

Response: Thank you for your instructive suggestions. We have revised Fig. 2 as suggested. (Lines 1007-1014, page 52 in the marked-up version)

Fig. 3 This is a large and busy Figure and the only significant responses were in response to linalool. I suggest you show only the responses to linalool here and report the nonsignificant results for the other host volatiles (Fig. 3C–L) in a supplementary figure. Also, please change the labels from “A” and “B” to “Females” and “Males” and delete “ns” throughout; retain just the asterisks to denote the significant differences between treatments. The caption to the revised Fig. 3 would then be: “Attraction rates of female and male *A. glabripennis* to (-) linalool at different concentrations (20 μL of either 0.1, 1, 10, or 100 μg/μL on a filter paper strip) in a y-tube olfactometer under either white (CK) or 365 nm LED (UV) light. Fifty males and females were tested with each combination of linalool concentration and light regime. Asterisks denote significant response to treatments *vs.* controls (Chi-square tests, *p* < 0.05).” Note: in the Discussion, you should mention that the power of your chi square tests was greater for the linalool and Z-3-hexen-1-ol tests (Fig. 3A-D) than for the other semiochemicals tested (Figs 3E-H) because your sample sizes were 1.7X greater (50 vs. 30 beetles). Just eyeballing Figs 3E and 3L, it looks like you might have concluded a significant response of females to 0.1 ug/ul of limonene and males to β-caryophyllene under white light, if you had used 50 beetles instead of 30.

Response: Thank you for your instructive suggestions. We sincerely apologize for the mistake. We carefully checked date analysis and revised relative content. (Line 1017-1032, pages 53-54; Lines 1143-1151, page 66 in the marked-up version)

Fig. 4 This Fig. would be easier to read and interpret with the following changes: 1) increase the contrast between the treatment and control percent response bars, e.g., clear or white for control and a dark shade or any darker color for treatment. 2) delete “ns” throughout -only the asterisks are needed to denote significance. 3) Insert “FEMALES” above the left-hand column and “MALES” above the right-hand column and then just label each set of female and male responses A, B, C and D on the left side of the Fig. The caption would then read: “The attraction rates of *A. glabripennis* females and males to different concentrations of sex pheromones (20 μL of either 0.1, 1, 10, or 100 μg/μL on a filter paper strip) in a y-tube olfactometer under either white (CK) or 365 nm LED (UV) light: A: nonanal; B: hexadecanal; C: [4-(n-heptyloxy) butanol: 4-(n-heptyloxy) butanal = 1:1]; and D: [heptanal: nonanal: hexadecanal = 1:7:1]. For each concentration-light regime combination, 30 males and 30 females were tested in response to the single compounds (A, B) and 50 males and 50 females were tested in response to the pheromone blends (C, D). Asterisks denote significant response to treatments *vs.* controls (Chi-square tests, **p* < 0.05; ** *P <* 0.01, ***: *p* < 0.001) (A-D, n=30; E-H, n=50).

Response: Thank you for your instructive suggestions. We have revised Fig. 3, Fig. 4, Fig. S2 as suggested. (Line 1017-1032, pages 53-54; Lines 1143-1151, page 66; Lines 1035-1051, pages 55-56 in the marked-up version)

Fig. 5. I assume the black dots represent the position of individual beetles, summed over all 5 replicates but please confirm.

Response: Thank you for your instructive suggestions. We have revised relative content as suggested. (Line 1069, page 59; Lines 1081-1082, page 60 in the marked-up version)

**Additional comments**

**8. Lines 198–201** “10 μL of semiochemicals at concentrations of 0.1, 1, 10, and 100 μg/μL were dropped onto filter paper (30 mm × 30 mm) and introduced randomly into one of arms of the olfactometer, and the other arm was placed into filter paper with 10 μL of paraffin oil as a control.”

Did you test in order of increasing concentration, or in random order? If the latter, and individual beetles were re-used, I am concerned about potential habituation or desensitization of individuals to lower concentrations of a semiochemical after exposure to a higher concentration.

Response: Thank you for your instructive suggestions. To avoid potential habituation or desensitization, each beetle was used only once in the Y-tube olfactometer bioassays. Consequently, the testing order of different concentrations did not affect the physiological response of the individuals. For each concentration, fresh beetles were introduced, and the sequence of concentrations tested was arranged randomly to ensure the independence of each treatment.

**9. Lines 221–225** “Similarly, no significant differences were observed in the attractive response of males to nonanal, blends of nonanal, heptanal, and hexadecanal at any of the concentrations tested. However, the relative attractive rate of semiochemical blends for adults was higher than that of (-)-linalool and nonanal (Fig. S2).”

I did not see any mention of these 2-choice bioassays in the Methods of section 2.5.

Response: Thank you for your instructive suggestions. We have removed Fig. S2 to Section 2.4 (formerly Section 2.5 in the original version), and added the corresponding methodologies as requested. (Lines 340-343, page 18, Lines 488-495, page 26, and Lines 1053-1058, page 57, in the marked-up version)

**10.Lines 227–230** “Semi-field bioassays in an insect cage were conducted in the greenhouse between July and August 2024 and 2025. The volume of the insect cage is 32 m3 (L = 4 m × W = 4 m × H = 2 m), which is made of stainless-steel frame and nylon screening (Fig. 1 A).”

Beetles, like moths, have been shown to orient upwind to attractive semiochemicals using optomotor anemotaxis. Was a fan used to generate airflow from the trap towards the beetle release point? If not, how confident are you that you provided the beetles with conditions conducive to testing their response to the semiochemicals?

Response: Thank you for your instructive comments. We did not employ fans to generate artificial airflow, following the established semi-field bioassay protocols described by Nehme et al. (2009) (Lines 359-362, Page 19). In a relatively large-volume enclosure (32 m³), although active "upwind" anemotaxis is restricted due to the lack of forced airflow, beetles can still locate semiochemical sources through random searching or localized volatile gradients created by natural air convection within the greenhouse. Most importantly, our data showed a significant synergistic effect: “Traps baited with 365-nm LED lights captured more ALB adults than traps baited with synthetic female-produced pheromones. Traps baited with both 365 nm LEDs and female-produced pheromone captured more males than did traps baited with either stimulus alone (see below figure).” This distinct behavioral response confirms that even in the absence of forced airflow, the beetles were able to perceive and respond to the semiochemical cues within the experimental setup.


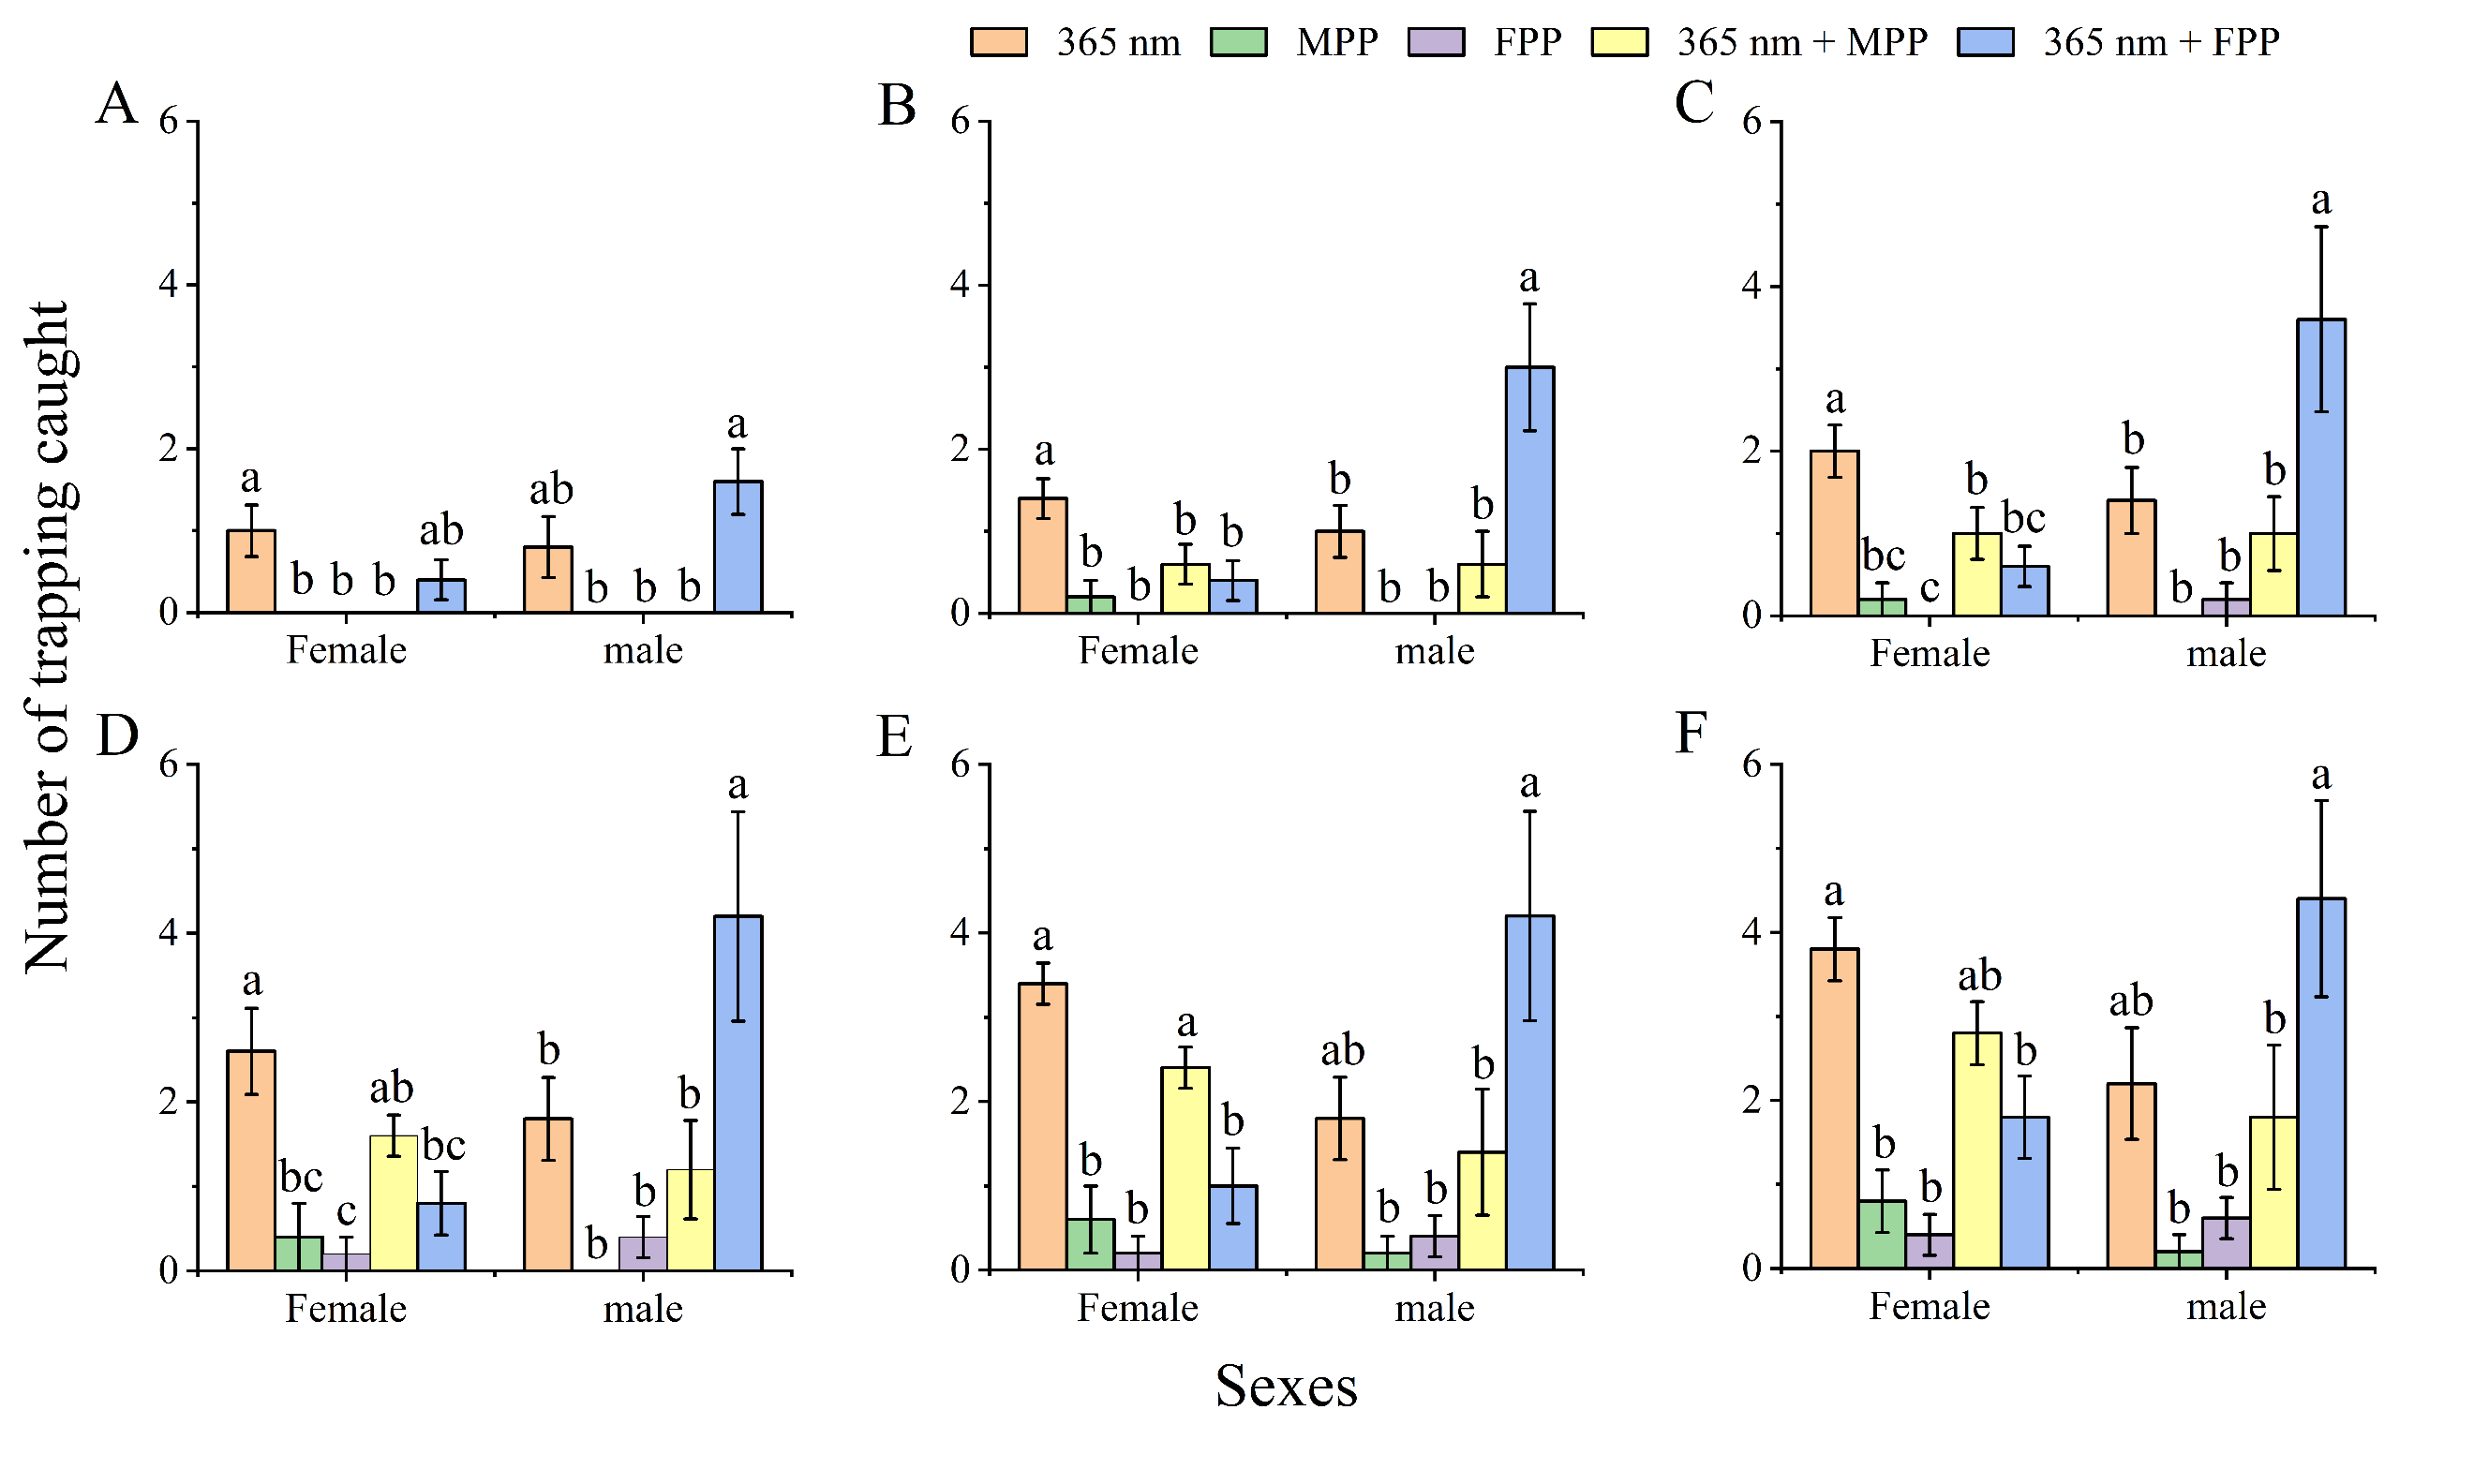


Nehme ME, Keena MA, Zhang A, Baker TC, Hoover K. (2009) Attraction of *Anoplophora glabripennis* to male-produced pheromone and plant volatiles. Environmental Entomology 38 (6):1745-1755.

**11.Lines 261–263** “Captured *A. glabripennis* individuals were collected and recorded during the night (8:00 PM-8:00 AM the following day).”

For how many days was the trapping experiment run? Did the collecting cup of the trap contain a wet preservative such as propylene glycol in water or, if dry, an insecticide to kill captured beetles? If beetles were live trapped, were they released in the field or collected and taken to the lab?

Response: Thank you for your insightful questions regarding the field trial protocols. We have clarified these details in the revised manuscript (Lines 396–407, page 21) as follows: (1) The trapping experiments were conducted for six consecutive days at each study site. (2) To eliminate potential cross-interference between light and chemical stimuli, traps were spaced at a horizontal distance of at least 100 m. Given the linear arrangement of border trees at the sites (approx. 600 m ×5 m), this spacing ensured the independence of each treatment (LED-only, semiochemical-only, and the bimodal combination). (3) The collection cups were kept dry without insecticides or preservatives. To ensure the accuracy of the daily catch records and prevent escape, beetles were live-captured and immediately transported to the laboratory for further observation or other independent studies. No captured beetles were released back into the field sites.

**12.Lines 374–375** “However, to date, trapping with semiochemical lures has not achieved operational efficacy in the eradication of cerambycids, particularly *A. glabripennis…”*

It’s highly doubtful that mass trapping with semiochemicals would ever be operationally efficacious in eradicating any cerambycid. I suggest you may want to change “eradication” to “monitoring and surveillance of *A. glabripennis”.*

Response: Thank you. We have changed “eradication” to “monitoring and surveillance of *A. glabripennis*” as suggested. (Line 582, page 30 in the marked-up version)

13. Okay, but from the differences in total length of the bars in many of the comparisons in Fig. 3, I assume that the number of responders varied among the different tests and that the percentages were calculated based on the total number of beetles tested (i.e., 50 for the linalool and Z-3-hexen-1-ol tests, and 30 for the others) and not based on the total number of responding beetles. I agree with your approach, since the chi square test is run on counts rather than proportions, but it would be good to explicitly state that’s how the percentages were calculated for the Figs.

Response: Thank you for your insightful observation. We confirm that the percentages displayed in Figure 3 were indeed calculated based on the total number of beetles tested per bioassay, rather than solely on the responding individuals. This approach ensures that the non-responding portion of the population is represented. As suggested, we have stated this calculation method and provided the formula in the revised manuscript to avoid any ambiguity. (Lines 431-434, pages 22 in the marked-up version).
